# Supplementary material for: Tyramine induces dynamic RNP granule remodeling and translation activation in the Drosophila brain
Source: eLife journal article supplement (doi:10.7554/elife.65742), 2021-04-23

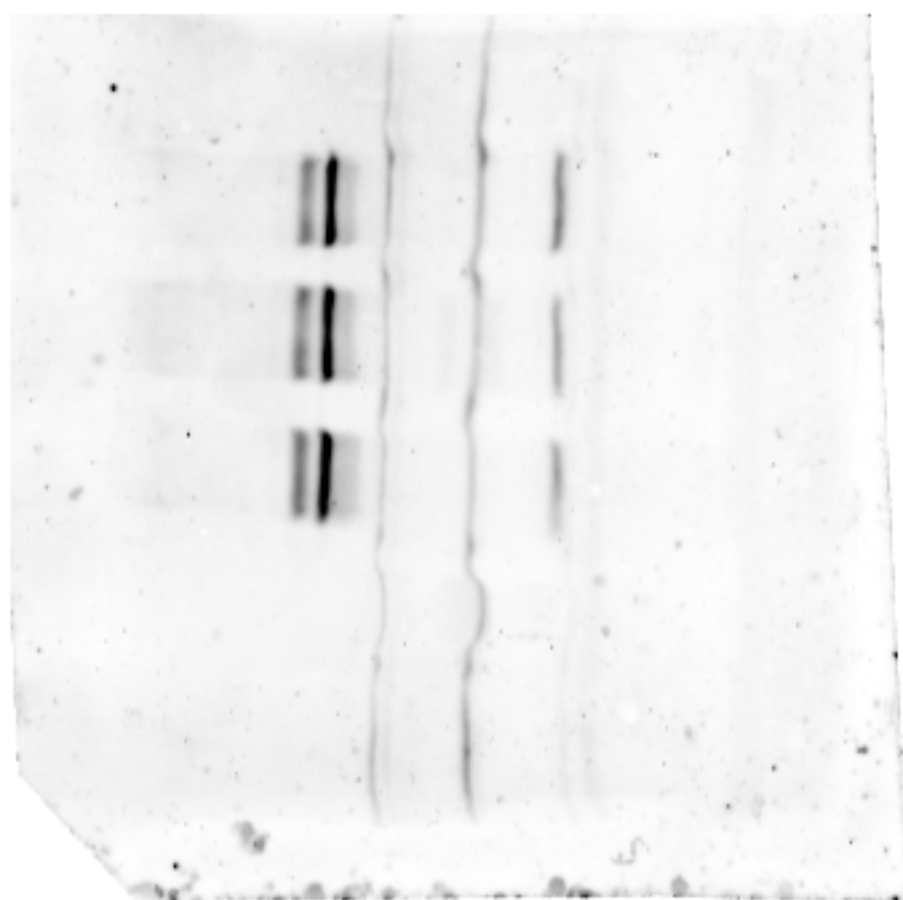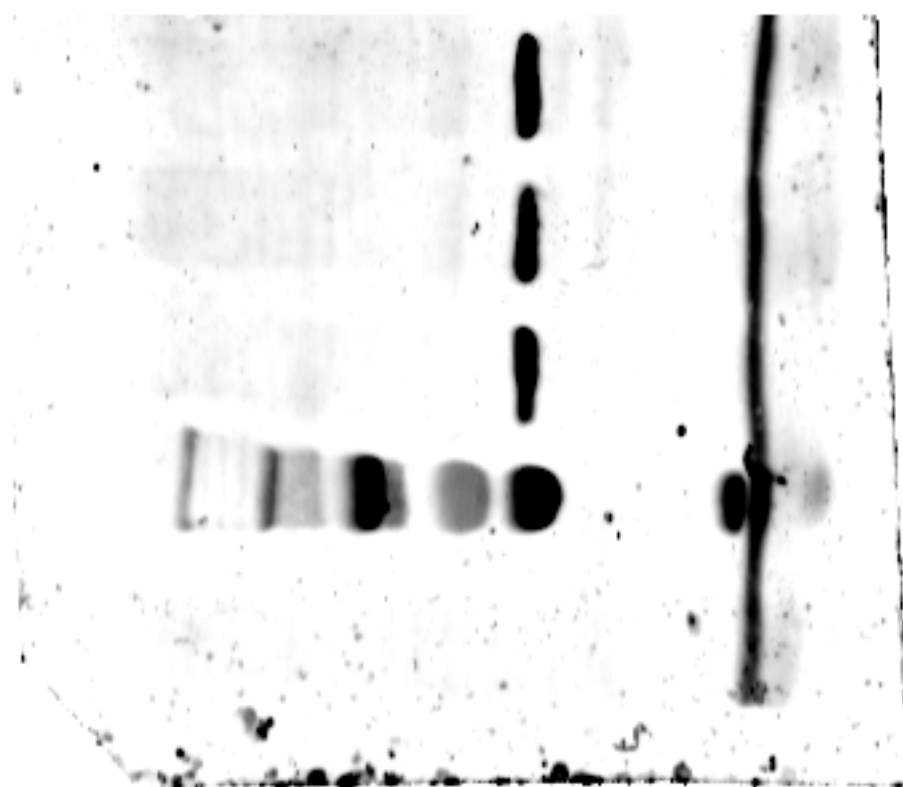

Supplement: fig1-figsupp2-data2 [file elife-65742-fig1-figsupp2-data2-v1.pdf]
