# Supplementary material for: Tyramine induces dynamic RNP granule remodeling and translation activation in the Drosophila brain
Source: eLife journal article supplement (doi:10.7554/elife.65742), 2021-04-23
Supplement: fig4-data2 [file elife-65742-fig4-data2-v2.pdf]

**bound**

**input**

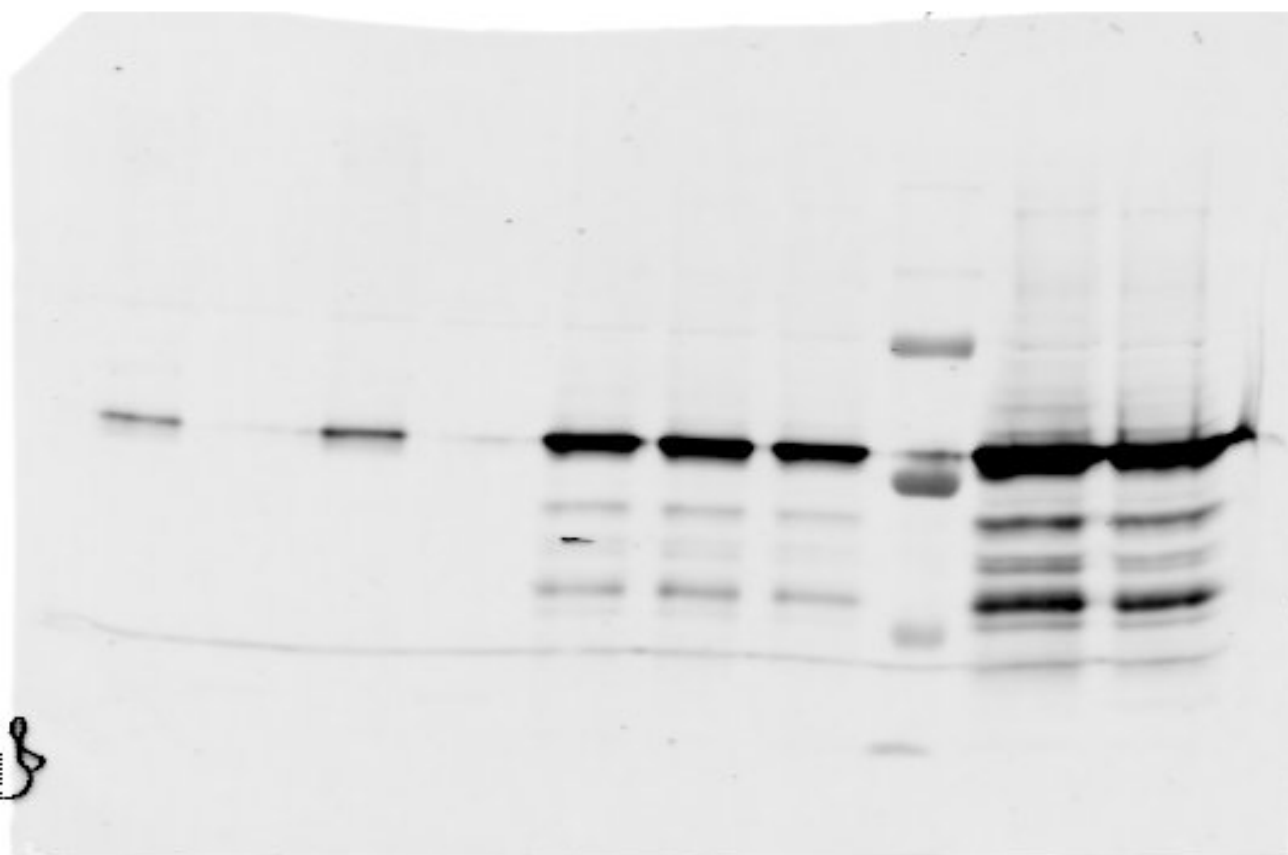

**$\alpha$ -Flag**

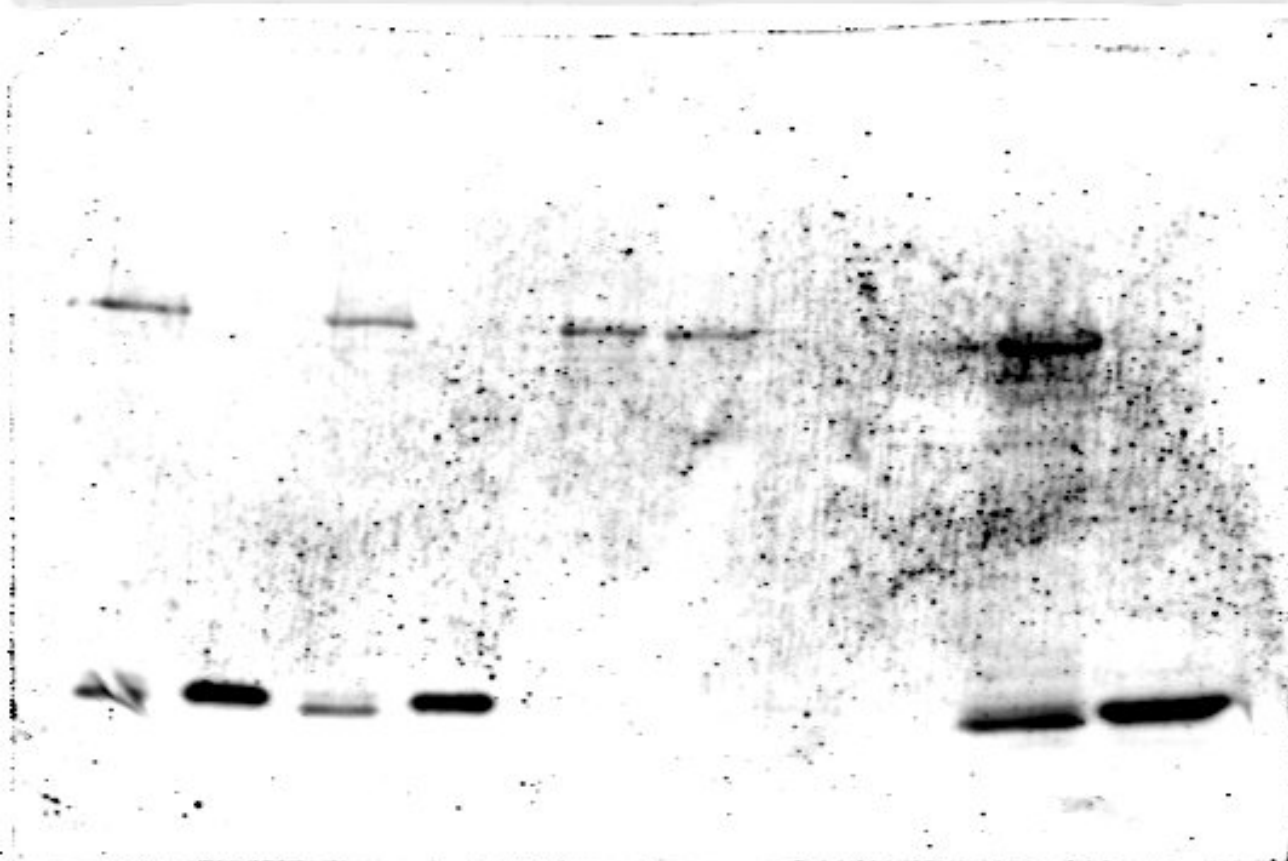

**$\alpha$ -GFP**
