# Supplementary material for: Tyramine induces dynamic RNP granule remodeling and translation activation in the Drosophila brain
Source: eLife. 2021 Apr 23;10:e65742. doi: 10.7554/eLife.65742 (PMC8064753; doi:10.7554/eLife.65742)
Supplement: Figure 1—figure supplement 1—source data 1. [file elife-65742-fig1-figsupp1-data1.xlsx]

## Sheet: A
	B
	number of Imp+ granules
	ctrl	Ach	Dopa	Oct	Tyr
Repl 1	101.559	130.958	74.833	66.8151	37.4165
	122.94	138.976	112.249	77.5056	34.7439
	130.958	136.303	82.8508	61.4699	58.7973
	128.285	88.196	88.196	32.0713	69.4878
	85.5234	114.922	56.1247	32.0713	48.1069
	58.7973	106.904	80.1782	37.4165	50.7795
	93.5412	88.196	50.7795	37.4165	56.1247
	74.833	98.8864	40.0891	24.0535	61.4699
	96.2138		61.4699	58.7973	32.0713
	82.8508		56.1247	56.1247	21.3808
	104.232			66.8151	42.7617
	120.267			64.1425	58.7973
Repl 2	85.7809	96.9697	70.8625	82.0513	78.3217
	108.159	82.0513	67.1329	100.699	63.4033
	78.3217	70.8625	85.7809	74.5921	100.699
	111.888	70.8625	111.888	55.9441	115.618
	115.618	85.7809	115.618	85.7809	89.5105
	130.536	89.5105	104.429	74.5921	78.3217
	108.159	74.5921	119.347	96.9697	130.536
	82.0513	104.429	141.725	70.8625	108.159
	119.347	137.995	108.159	96.9697	67.1329
	78.3217	134.266	115.618	115.618	67.1329
	123.077	108.159	108.159	108.159	70.8625
	104.429	115.618	149.184	82.0513	59.6737
	74.5921	29.8368	108.159	78.3217	37.296
	82.0513	48.4848	115.618	85.7809	70.8625
	119.347	123.077	115.618	74.5921
	78.3217	93.2401	141.725	89.5105
		104.429	82.0513
		93.2401	74.5921
			119.347
			96.9697
Repl 3	95.2	103.6	92.4	98	92.4
	92.4	95.2	89.6	95.2	75.6
	84	100.8	89.6	70	61.6
	112	117.6	84	56	70
	89.6	106.4	67.2	81.2	72.8
	98	103.6	64.4	106.4	92.4
	75.6	92.4	120.4	92.4	39.2
	64.4	109.2	100.8	106.4	33.6
	128.8	95.2	92.4	123.2	78.4
	123.2	120.4	86.8	128.8	109.2
	98	95.2	58.8	109.2	78.4
	120.4	75.6	58.8	100.8	81.2
	106.4	92.4	92.4	128.8	81.2
	112	95.2	72.8	126	75.6
		98		75.6
		103.6		67.2
				98
				109.2

## Sheet: C
	C
	# Imp granules (normalized means)					Me31B partition coefficient (normalized means)
	control	Tyramine	Tyramine + recovery			control	Tyramine	Tyramine + recovery
	100	79.22	94.99			100	79.276	88.7755
	100	46.85	98.54			100	81.9275	119.74
	100	51.76	90.12

## Sheet: D
	D
	number of Imp+ granules
	ctrl	kir2.1	ctrl + Tyramine	kir2.1 + Tyramine
repl1	101.124	30.3371	91.0112	40.4494
	131.461	40.4494	60.6742	30.3371
	60.6742	40.4494	70.7865	91.0112
	40.4494	10.1124	121.348	101.124
	60.6742	50.5618	101.124	101.124
	60.6742	50.5618	80.8989	50.5618
	182.022	30.3371	151.685	50.5618
	121.348	40.4494	131.461	70.7865
	131.461	10.1124	70.7865	50.5618
	111.236	30.3371		50.5618
	80.8989	50.5618		50.5618
	80.8989	70.7865		30.3371
	101.124	30.3371		91.0112
	111.236	20.2247		40.4494
	80.8989	40.4494		80.8989
	50.5618	91.0112		50.5618
	131.461	60.6742		91.0112
	161.798			50.5618
repl2	53.2258	17.7419	97.5806	97.5806
	106.452	70.9677	141.935	115.323
	106.452	17.7419	70.9677	106.452
	124.194	79.8387	97.5806	79.8387
	79.8387	44.3548	106.452	106.452
	124.194	35.4839	70.9677	115.323
	62.0968	44.3548	168.548	195.161
	97.5806	53.2258	70.9677	106.452
	62.0968	53.2258	88.7097	133.065
	44.3548	115.323	106.452	115.323
	150.806	70.9677	97.5806	62.0968
	62.0968	53.2258	124.194	53.2258
	124.194	35.4839	106.452	26.6129
	150.806		106.452	124.194
	79.8387		44.3548	88.7097
	97.5806		106.452	124.194
	212.903		115.323	133.065
	124.194		141.935
	115.323		115.323
	106.452
	53.2258
	62.0968
repl3	69.2308	61.5385	153.846	115.385
	169.231	61.5385	107.692	100
	92.3077	92.3077	61.5385	115.385
	61.5385	92.3077	153.846	84.6154
	61.5385	53.8462	130.769	84.6154
	115.385	107.692	84.6154	46.1538
	153.846	53.8462	84.6154	53.8462
	130.769	15.3846	107.692	123.077
	107.692	38.4615	107.692	107.692
	130.769	100	53.8462	46.1538
	69.2308	123.077	30.7692	61.5385
	69.2308			69.2308
	69.2308			30.7692
	115.385			84.6154
	84.6154			76.9231
repl4	133.779	46.8227	53.5117	66.8896
	140.468	46.8227	20.0669	53.5117
	86.9565	73.5786	73.5786	86.9565
	93.6455	107.023	80.2676	93.6455
	33.4448	80.2676	120.401	60.2007
	33.4448	53.5117	120.401	66.8896
	93.6455	107.023	66.8896	147.157
	120.401	33.4448	100.334	73.5786
	80.2676	60.2007	86.9565	46.8227
	60.2007		80.2676	60.2007
	160.535		80.2676
	180.602
	127.09
	140.468
	127.09
	100.334
	60.2007
	53.5117
	80.2676
	93.6455
