# Supplementary material for: Tyramine induces dynamic RNP granule remodeling and translation activation in the Drosophila brain
Source: eLife. 2021 Apr 23;10:e65742. doi: 10.7554/eLife.65742 (PMC8064753; doi:10.7554/eLife.65742)
Supplement: Figure 1—figure supplement 2—source data 1. [file elife-65742-fig1-figsupp2-data1.xlsx]

## Sheet: B
	B
	protein levels (normalized)
	Me31B		Imp
	t=0	t=32	t=0	t=32
	1	1.07638	1	1.03205
	1	1.09387	1	1.375
	1	0.986021	1	1.1831
	1	0.87667	1	0.958333
	1	0.987692	1	0.987952
	1	0.949195	1	0.95
	1	0.81236	1	1.16901
	1	0.859893	1	1.08333
	1	1	1	0.967742
	1	1.0864	1	1
	1	1.09497	1	1.44199
	1	1.10671	1	1.03285
	1	1.20524	1	1.064
	1	1.14919	1	1.15625
	1	1.24538
	1	1.91705
	1	1.15355
	1	1.20882
	1	1.09059
	1	1.11921
	1	0.780795
	1	0.806316
