# Supplementary material for: Tyramine induces dynamic RNP granule remodeling and translation activation in the Drosophila brain
Source: eLife. 2021 Apr 23;10:e65742. doi: 10.7554/eLife.65742 (PMC8064753; doi:10.7554/eLife.65742)
Supplement: Figure 1—source data 1. [file elife-65742-fig1-data1.xlsx]

## Sheet: D
	D
	number of Imp+ granules
		control	Tyramine
	Repl 1	94.8905	77.193
		97.2628	72.5146
		104.38	11.6959
		106.752	98.2456
		123.358	74.8538
		99.635	107.602
		125.73	58.4795
		71.1679	128.655
		118.613	60.8187
		83.0292	105.263
		154.197	32.7485
		113.869	67.8363
		68.7956	130.994
		80.6569	42.1053
		75.9124	51.462
		71.1679	9.35673
		113.869	67.8363
		73.5401	32.7485
		75.9124	49.1228
		125.73	60.8187
		120.985
		106.752
		149.453
		78.2847
		64.0511
		102.007
	Repl 2	70.8286	39.0977
		103.292	54.1353
		118.048	66.1654
		103.292	33.0827
		112.145	27.0677
		109.194	69.1729
		64.9262	39.0977
		115.096	54.1353
		129.852	36.0902
		112.145	42.1053
		94.4381	48.1203
		70.8286	57.1429
		159.364	45.1128
		126.901	3.00752
		79.6822	9.02256
		132.804	21.0526
		82.6334	9.02256
		97.3893	30.0752
		47.2191	9.02256
		67.8774	24.0602
		91.4869
		115.096
		94.4381
		56.0726
		115.096
		129.852
	Repl 3	134.003	46.0637
		146.566	12.5628
		54.4389	25.1256
		146.566	100.503
		113.065	41.876
		117.253	25.1256
		83.7521	46.0637
		138.191	87.9397
		75.3769	16.7504
		79.5645	12.5628
		79.5645	37.6884
		100.503	83.7521
		146.566	16.7504
		79.5645	20.938
		96.3149	75.3769
		104.69	92.1273
		75.3769	58.6265
		142.379	83.7521
		71.1893	58.6265
		54.4389	46.0637
		67.0017	37.6884
		62.8141	113.065
		58.6265	37.6884
		150.754	62.8141
		121.441
		132.331

## Sheet: E
	E
	number of Me31B+ granules
		control	Tyramine
	Repl 1	69.7466	118.033
		80.4769	91.2072
		88.5246	139.493
		83.1595	136.811
		99.2548	80.4769
		118.033	123.398
		85.842	163.636
		77.7943	136.811
		115.35	112.668
		115.35	131.446
		112.668	112.668
		91.2072	101.937
		126.08	126.08
		131.446	104.62
		109.985	150.224
		123.398	118.033
		91.2072	123.398
		80.4769	101.937
	Repl 2	92.9461	119.087
		116.183	90.0415
		95.8506	124.896
		113.278	95.8506
		90.0415	69.7095
		92.9461	104.564
		90.0415	55.1867
		104.564	66.805
		104.564	90.0415
		113.278	84.2324
		81.3278	84.2324
		136.515	58.0913
		72.6141	60.9959
		95.8506	75.5187
	Repl 3	109.328	56.6161
		91.757	56.6161
		119.089	99.5662
		146.421	87.8525
		97.6139	46.8547
		95.6616	52.7115
		70.282	93.7093
		81.9957	109.328
		95.6616	85.9002
		91.757	85.9002
		101.518	97.6139
		93.7093	99.5662
		91.757	107.375
		115.184	87.8525
		85.9002
		95.6616
		107.375
		109.328
	Repl 4	93.0818	105.66
		91.8239	104.403
		109.434	105.66
		95.5975	118.239
		89.3082	120.755
		105.66	120.755
		105.66	83.0189
		100.629	85.5346
		99.3711	100.629
		85.5346	99.3711
		127.044	74.2138
		106.918	80.5031
		106.918
		96.8553
		91.8239
		98.1132
		93.0818
		103.145

## Sheet: F
	F
	Me31B partition coefficients						Mean
		control	Tyramine				control	Tyramine
	Repl 1	2.61692	1.73771			Repl 1	3.86	3.376
		3.21393	2.37705			Repl 2	6.027	5.619
		2.97512	2.19672			Repl 3	3.346	2.994
		2.95522	2
		2.80597	3.08197
		3.24378	2.08197
		3.54726	2.42623
		3.39801	2.29508
		3.75124	2.88525
		3.32836	2.11475
		5.0597	2.68852
		3.66169	2.16393
		5.22886	2.62295
		3.55721	2.54098
		3.66169	2.31148
		5.00995	2.70492
		4.93532	2.72131
		3.95025	2
		4.06965	2.52459
		3.12935	1.95082
		3.68159	2.47541
		4.94527	2.59016
		3.10945	3.45902
		3.26866	2.63934
		3.19901	3.16393
		5.9005	2
		7.10945	2.47541
		4.23383	2.44262
		3.0199	2
		2.9801
		3.64179	1.95522
		3.32836	2.8209
		6.1592	2
		4.38309	1.8806
		4.40796	2.40299
		3.00995	2.07463
		3.04975	1.95522
		3.75124	1.95522
		3.86567	3.13433
		4.12935	2.26866
		4.00497	2.41791
		5.95025	2.08955
		4.00995	2.04478
		2.50746	1.9403
		4.33333	2.73134
		2.8806	2.32836
		3.64179	1.95522
		3.13433	2.46269
		2.87562	2.56716
		3.78607	2.02985
		2.46766	2.34328
		3.46766	2.14925
		3.9403	1.97015
			2.74627
		2.59794	3.28358
		4.14949	2.01492
		4.15464	2.43284
		2.86598	3.8209
		4.60309
		4.48969	6.84884
		3.12371	2.59302
		2.84021	2.98837
		2.62887	3.6686
		2.97423	3.26163
		3.50515	4.80814
		3.92268	2.94767
		5.39691	7.33139
		3.59278	2.7093
		4.13917	4.58139
		4.08247	4.11046
		5.28866	4.44186
		4.37629	2.91279
		3.23711	2.81977
		2.54639	2.8314
		4.29381	5.61628
		3.20619	3.2093
		4.65464	3.98256
		3.17526	4.4593
		4.62887	2.9593
		3.06701	4.72674
		3.16495	3.47674
		7.89691	3.34884
		3.19588	4.18605
		4.18041	4.99419
		3.27835	2.75581
		4.31959	3.66279
		3.12371	2.73256
		4.64949	3.58721
		3.2268	5.7907
		3.85567	5.35465
		3.54639	2.73256
		4.57732	6.10465
		3.15464	2.4593
		3.65464	4.32558
		2.69072	5.63954
		3.67526	2.77326
		2.81443	2.97674
		3.39691	4.52326
		2.91753	4.31395
		3.1701	3.0407
		4.40206	2.75581
			3.00581
		3.11511	4.55233
		3.97842	6.86046
		5.38129	2.97093
		4.48921	2.91279
		5.33094
		5.68345	3.60825
		5.46763	3.79897
		6.6259	2.47938
		3.43166	3.02577
		3	3.37113
		4.72662	4.5
		3.23022	4.47423
		5.35252	3.24227
		3.51799	3.81443
		4.55396	3.01031
		3.46043	4.29381
		6.02158	2.23196
		8.2446	2.65979
		4.10072	4.02062
		6.14389	2.90206
		3.93525	5.91753
		3.05036	4.87629
		3.59712	5.08763
		4.7482	3.35052
		2.95683	5.27835
		5.57554	4.62887
		3.39568	3.74742
		4.48921	2.47938
		3.89209	4.48454
		10.1799	3.38144
		3.59712	2.52062
		3	3.99485
		5.02158	6.43814
		4.38849	3.06701
		3.66906	3.50515
		4.20863	4.03608
		3.43885	4.75258
		3.46043	3.39691
		7.35971	3.0567
		6.09352	4.91753
		3.28777	3.93814
		6.01439	3.31443
		3.86331	2.70619
		6.26619	3.52577
		4.1295	2.46907
		4.23022	2.40722
		3.14389	3.29381
		5.88489	2.58763
		3.65468
		4.79856	3.39423
		4.89928	2.78846
		8.76259	2
		3.39568	2.375
		6.1295	1.83654
		3.60432	1.91346
		3.52518	2.80769
		3.20144	1.93269
		3.82734	2.5
		4.68345	2.30769
			2.125
		4.15972	2.74038
		5.90278	2.18269
		3.90278	1.75961
		4.00694	2.625
		2.97222	2.09615
		5.01389	2.91346
		3.47917	2.29808
		3.5	1.89423
		5.39583	2.16346
		3.51389	2.31731
		2.86806	2.49038
		3.8125	2.18269
		5.5	2.19231
		5.1875
		4.20139	2.1453
		3.21528	2.4359
		3.45139	2.37607
		5.30556	2.42735
		4.55556	2.35897
		3.72917	2.38462
		4.14583	3.55556
		3.72917	2.1282
		3.36806	1.83761
		4.20139	2.37607
		6.52083	2.78633
		4.3125	2.16239
		5.73611	2.07692
		6.00694	3.05128
		3.23611	1.82051
		3.81944	3.39316
		5.42361	1.96581
		3.40278	2.59829
		3.5	1.8547
		4.23611	2.44444
		3.34028	2.33333
		3.40972	2.06838
		4.625	2.21367
		6.21528	1.89744
		2.83333	2.32479
		5.09722	2.30769
		3.125	2.01709
		3.13889
		2.96528	4.68805
		4.80556	4.83674
		3.48611	4.61224
		2.75694	4.0379
		4.77083	6.64723
		3.20833	3.51604
		3.8125	4.10496
		4.27083	2.72595
		4.63889	4.86589
		4.375	7.22741
		3.59722	8.65889
		3.02778	3.42566
		5.13889	2.95335
		3.48611	3.34985
		4	5.4723
		5.45139	4.82799
		6.93056	5.51603
		3.6875	5.19534
		6.73611	3.33819
		3.15972	7.40816
		3.51389	4.14869
		4.90972	3.80758
		5.52778	4.80175
		6.88194	3.51312
		3.27083	3.86297
		5.92361	4.76093
		4.92361	2.70845
		3.50694	4.92128
		3.3125	4.57434
		6.1875	4.71137
			6.1691
		2.62356	5.21283
		3.56034	2.94169
		3.03448	4.18659
		2.89655	3.65306
		3.45402	3.44023
		2.95115	4.99125
		2.88506	4.62099
		4.76437	2.9242
		4.78161	3.21866
		2.60058	3.68805
		2.64368	2.65889
		2.52299	5.39942
		2.43678	6.80175
		4.47989	4.00875
		2.42529	4.20408
		4.78161
		3.6092	3.8187
		4.25862	3.75921
		4.76437	2.71671
		3.3908	3.16431
		4.97414	2.44193
		2.95977	5.20113
		3.37644	2.76204
		3.12644	5.19547
		2.9454	2.51841
		4.46839	2.1898
		3.62931	2.6204
		3.55747	3.00283
		3.20115	4.56091
		2.92241	3.6204
		3.02586	2.94618
		3.66667	3.55241
		3.92816	3.43059
		2.74713	4.50992
		3.54598	2.57224
		2.52874	3.29745
		3.72701	2.42776
		3.38506	2.9915
		3.07471	4.81586
		3.38793	2.8187
		3.48851	3.37677
		5.38218	3.44193
		4.00287	2.87819
		3.14942	3.05666
		2.83621	2.35411
		3.43391	2.84986
		5.20977	5.26346
		2.68391	2.63739
		4.73276	4.46176
			3.07365
		3.8	2.44759
		2.75102	2.68838
		2.47347	2.43909
		2.79592	2.64589
		4.68571	4.30028
		2.41224	2.80736
		3.48163	4.11048
		4.17959	3.90652
		4.38776	3.34278
		2.70204	3.71955
		3.02041	4.50142
		4.34694	2.69405
		4.79184	2.90368
		3.31837	2.91501
		2.57551	3.983
		3.13878	4.23796
		3.44898	2.27196
		2.93061
		5.52245	2.88973
		3.2898	2.8251
		3.47347	3.01141
		2.89796	2.92776
		3.65714	3.14068
		4.12245	2.92776
		2.7102	2.36882
		4.72653	4.29658
		3.06939	2.81749
		3.38367	3.41825
		3.14694	3.1711
		3.36327	2.73384
		3.77959	2.5019
		4.94694	2.38023
		3.0449	2.59316
		4.46939	3.43346
		4.12653	2.1597
		3.65306	4.05703
		5	2.84411
		3.34694	2.61977
		3.52245	3.13308
		2.83265	2.70722
		2.7551	2.55893
		3.72653	2.89734
		2.6449	2.71103
		2.49388	3.84791
		5.3551	2.98479
		4.45306	3.96958
		2.52653	3.89354
		3.03265	4.42966
		3.22857	2.62357
			5.79087
		2.8884	4.72243
		3.29103	2.57414
		2.94092	2.09886
		3.11597	2.92776
		2.61707	3.20152
		3.61926	4.53992
		5.62363	3.6578
		2.8884	2.82129
		3.06565	3.51711
		6.76368	2.19772
		2.79869	4.13308
		3.74179
		5.74617	5.2852
		2.95624	2.53791
		6.64551	2.88448
		3.57112	3.77256
		2.75273	2.13357
		7.01969	2.44043
		3.54048	3.09025
		2.98906	3.25632
		4.04157	3.44404
		6.39387	3.02166
		2.7768	2.66426
		3.70897	4.787
		3.65427	2.90975
		2.6849	2.90614
		3.04376	3.4657
		3.65208	2.88448
		3.66958	2.40433
		5.23632	2.41877
		5.34354	3.01805
		6.82713	3.27798
		9.22538	3.39711
		4.73742	3.09386
			2.49819
		2.57784	2.31047
		4.38323	4.71841
		3.9012	2.72924
		4.01497	2.62455
		6.23653	3.74729
		3.56886	2.62094
		2.58683	2.73646
		3.23653	2.90614
		3.30539	2.8917
		4.27844	3.0361
		3.68563	2.83033
		2.90419	3.88448
		3.09281	4.33574
		3.7006	2.70036
		4.58383	3.11552
		2.91617	2.62455
		2.6976	2.99639
		2.51497	3.72202
		2.89521
		4.65269	3.09402
		3.82934	2.65812
		2.51796	3.40171
		2.73653	2.59259
		3.05988	2.73219
		4.81138	2.85185
		3.93713	6.50997
		6.0509	3.4131
		5.25449	3.93162
		3.73054	2.69516
		3.96407	3.35897
		3.71557	4.91168
		3.80539	4.51282
		3.91317	3.39316
		2.78742	4.74074
		3.98204	3.75784
		4.49701	4.05413
		5.16467	3.19943
		3.11377	3.20798
		2.67066	3.58974
		3.0479	2.93162
			3.62963
		3.57876	3.78917
		2.91941	6.64388
		2.31135	3.03989
		2.38095	6.15385
		2.9011	2.90883
		3.27473	3.39886
		2.4652	2.8661
		3.51282	5.00855
		3.05861	4.87179
		2.35531	3.31054
		3.84982	2.79202
		3.05128	4.44444
		2.98169	3.41595
		2.31135	7.23647
		2.53114	5.74359
		5.70696	3.50712
		2.39927	4.45584
		3.95971	2.45014
		4.26007	2.81766
		2.57876	3.23077
		2.95238	4.19373
		3.22344	4.78063
		3.79121	4.96011
		2.68498	3.39886
		2.96337	2.85755
		3.3663	4.39601
		2.69597	2.78348
		3.4652	3.76353
		2.95971
		3.93407	3.09921
		3.43223	4.62698
		2.89744	2.86111
		2.9707	5.96032
		3	2.76984
		3.47985	7.16667
		3.75824	3.97619
		2.49084	3.40079
		2.59707	3.54365
		3.42491	5.78175
		2.65202	5.30556
		2.55311	2.68651
		3.15385	3.10714
		2.57876	3.59127
		2.61172	3.22222
		2.68498	2.99206
		2.10256	5.82143
		2.35897	3.33333
			3.53175
		2.78879	3.79762
		3.12931	5.53571
		4.02586	3.5754
		2.47414	2.94841
		2.60345	2.75794
		3.42672	2.36111
		3.18103	3.61508
		2.43966	3.3373
		2.44828	2.76587
		3.13793	2.68651
		2.94397	2.95635
		2.22845	3.30556
		3.84483	4.21429
		5.85776	2.80952
		2.38362	3.45238
		5.22845	2.79365
		3.72845	3.85714
		7.125	2.98016
		2.68966	4.02778
		2.15948	3.12698
		4.7069	5.03175
		3.84914	2.89683
		2.34483	3.76984
		2.71552	3.71032
		2.24138	3.57143
		3.47845	5.98413
		3.10345	4.84127
		3.10776	3.98413
		2.36638
		2.51724	2.28326
		2.70259	3.74249
		2.26293	2.58369
		2.49569	2.54936
		2.8319	3.61373
		4.13362	2.54077
		3.71983	2.8412
		2.59483	3.16738
		2.78448	6.30901
		5.05603	2.30472
		3.31466	2.81116
		3.91379	4.1073
		2.28017	4.87125
		2.9569	3.11159
		2.72414	2.33047
		2.39224	2.98283
		2.30603	2.69099
			2.81116
		5.66887	2.67811
		4.23841	2.62232
		3.5	4.18884
		3.28477	3.13305
		2.46027	2.58798
		3.19536	2.70386
		2.99669	3.30043
		4.17218	3.64807
		2.85431	2.20601
		2.54967	2.5794
		4.24503	4.92275
		5.59934	2.77253
		3.78146	2.75107
		4.0298	3.3691
		2.78477	3.09013
		5.40728	2.48927
		4.11921	2.39485
		2.79801	2.2103
		2.5596	3.25322
		3.07947	2.36481
		4.11258	2.15451
		3.25166	2.97854
		3.39735	2.54077
		2.82782	3.17167
		3.33444	3.07725
		2.60927	3.72961
		2.66225	2.65665
		4.67881	3.34335
		2.98676	2.90987
		2.91391	2.31331
		2.92715	3.24893
		2.69868	5.70815
		2.7351	3.83262
		2.54636	3.0515
		3.80464	3.23605
		2.99007
		3.03973	4.925
		2.81788	2.94
		3.45695	3.56
		5.41722	2.885
		3.89735	5.35
		3.90066	4.16
		2.56623	3.73
		4.27815	2.92
		3.50331	3.945
		2.43377	4.765
		2.67881	2.855
		3.92053	2.455
		2.6755	3.975
			3.37
		3.00362	2.94
		5.11956	3.455
		3.88043	2.94
		2.3442	3.83
		3.56522	2.61
		3.03986	2.62
		2.97464	3.2
		4.51812	2.45
		2.92754	2.825
		5.4058	3.34
		2.35507	2.675
		3.4058	3.015
		3.46377	4.735
		5.86594	3.92
		4.41304	6.345
		3.05797	3.635
		2.42391	3.27
		2.55072	3.93
		4.94928	3.265
		3.0471	3.55
		3.61232	2.635
		2.46014	7.04
		2.88768	3.48
		5.69203	2.53
		4	3.695
		3.17754	3.84
		2.92029	3.435
		3.47101	3.135
		4.05072
		2.6087
		2.62319
		3.31522
		3.80435
		3.71739
		2.47464
		4.82609
		4.21014
		2.81522
		2.74275
		4.77174
		3.22101
		4.19203
		3.43116
		2.79348
		2.33696
		2.50725
		2.67029
		3.65649
		2.69466
		3.0458
		3.39695
		4.36641
		2.56488
		3.23664
		2.85496
		3.29771
		4.69466
		5.82443
		3.46565
		3.67176
		3.35114
		3.19084
		3.12214
		5.16031
		2.72519
		6.32061
		4.15267
		2.96947
		3.00763
		3.41221
		3.54198
		2.54198
		3.99237
		2.74046
		4.0458
		4.77099
		3.34351
		2.54962
		2.86259
		3.12214
		2.89313
		4.16794
		4.38931
		3.64886
		3.84733
		5.44275
		4.74809
		3.54198
		2.77099
		3.27481
		2.54198
		3.25191
		5.34153
		2.62568
		3.78688
		2.93716
		4.68033
		4.8306
		2.73771
		3.98634
		3.8388
		3.34426
		3.60109
		5.75137
		3.06557
		2.63115
		4.31967
		5.54645
		4.59836
		3.87432
		4.44262
		4.29235
		3.53825
		3.37705
		2.61202
		4.1612
		3.82514
		3.61202
		3.82787
		6.43169
		4.22951
		3.61475
		3.84153
		7.17213
		7.11202
		2.91803
		3.32787
		3.47541
		4.02459
		2.80874
		3.0929
		4.63934
		4.34426
		4.63934
		3.09563
		3.91803
		3.23771
		3.33607
		4.10656
		3.64208
		4.57377
		3.35519
		3.90984
		6.77322
		3.29508
		3.41803
		3.22404
		3.61475
		5.94262
		2.87978
		5.27843
		3.69412
		4.61569
		3.58431
		3.87843
		3.10588
		3.87451
		2.71765
		3.05098
		3.45882
		4.0902
		4.80392
		3.25098
		2.62353
		2.81961
		4.43922
		2.93333
		2.80392
		3.10588
		3.23137
		4.61961
		3.61961
		2.76078
		5.29804
		3.90196
		6.35294
		4.06274
		2.84314
		4.10196
		6.07059
		5.8902
		4.27843
		2.81569
		2.62353
		3.12941
		4.28235
		3.03529
		5.96078
		3.41176
		2.46667
		3.03922
		6.07451
		4.38823
		2.7451
		5.57488
		3.09179
		4.34783
		4.98068
		4.0628
		3.00483
		4.01932
		2.9372
		3.29952
		3.17874
		5.81159
		2.57971
		5.51208
		3.09179
		3.21739
		4.25604
		3.34783
		3.51208
		3.27053
		3.00966
		5.93237
		6.88889
		2.91304
		3.18357
		4.88889
		3.29952
		6.83575
		2.80676
		3.08696
		6.69565
		3.57005
		4.19324
		4.37681
		3.25121
		6.05314
		7.01449
		2.63285
		4.76328
		4.19324
		6.75845
		2.89855
		4.03382
		3.48309
		2.76329
		3.45989
		4.2754
		6.00535
		6.59091
		3.37968
		5.38503
		7.07754
		5.71925
		3.86364
		3.43048
		3.31283
		3.01337
		4.86096
		6.96257
		3.07487
		3.81283
		3.79947
		4.79412
		4.05882
		6.01337
		4.69786
		4.31551
		4.39037
		4.68449
		3.82888
		3.3877
		5.09358
		3.10428
		6.91711
		2.91979
		3.25401
		3.30749
		2.87701
		4.92513
		5.72727
		4.41444
		2.7246
		3.95187
		3.40107
		4.29144
		5.23529
		3.36364
		3.2139
		4.2139
		4.03476
		3.6738
		3.59358
		4.25401
		3.66578
		5.48128
		4.64171
		2.81016
		7.58289
		5.10695
		4.3064
		4.99663
		5.52189
		3.38384
		8.49832
		3.85185
		3.16162
		3.30303
		4.3468
		3.58249
		5.0202
		2.80135
		2.78114
		2.73401
		3.98317
		3.83838
		3.31987
		3.56566
		5.28283
		5.09091
		5.29966
		2.88552
		4.68013
		5.0404
		4.83502
		4.41414
		5.56566
		3.83502
		5.32997
		3.76768
		4.6229
		4.75758
		5.6633
		3.6532
		5.35017
		7.04377
		4.55892
		4.85522
		3.83838
		2.55219
		3.35353
		5.11784
		3.63973
		3.7037
		5.34007
		4.07744
		4.7138
		3.04377
		3.12795
		2.87205
		5.68687
		6.03367
		4.51515
		4.0202
