# Supplementary material for: Tyramine induces dynamic RNP granule remodeling and translation activation in the Drosophila brain
Source: eLife. 2021 Apr 23;10:e65742. doi: 10.7554/eLife.65742 (PMC8064753; doi:10.7554/eLife.65742)
Supplement: Figure 2—figure supplement 1—source data 1. [file elife-65742-fig2-figsupp1-data1.xlsx]

## Sheet: Feuil1
	Number of GFP-Imp+ granules
	time (min)	ctrl
	0	1.17073	0.956522	0.914286	1.1	1	1.10769	1.2093	0.965517	1	0.97479	1.17647	1.10345	1.16667	1.06122	0.955224	1.03226
	0.5	0.97561	1.13044	0.914286	0.8	1.05	0.984615	0.837209	0.965517	0.971429	1.04202	0.941176	0.965517	0.666667	0.979592	1.07463	1.03226
	1	0.97561	1.04348	0.914286	1	0.95	0.923077	0.651163	0.965517	1.02857	1.0084	0.941176	1.03448	1.16667	0.979592	0.955224	0.967742
	1.5	0.878049	0.869565	1.25714	1.1	1	0.984615	1.30233	1.10345	1	0.97479	0.941176	0.896552	1	0.979592	1.01493	0.967742
	2	0.878049	0.695652	0.914286	0.9	1.05	1.04615	1.02326	0.689655	0.971429	0.941176	1.17647	0.896552	1	0.979592	0.955224	0.967742
	2.5	1.17073	0.956522	1.14286	1	1	0.984615	0.837209	1.37931	1.02857	1.10924	0.862745	1.10345	0.916667	0.897959	0.955224	1.03226
	3	1.26829	0.956522	1.14286	0.9	0.9	1.04615	1.11628	0.689655	0.971429	1.04202	0.784314	1.10345	1.08333	0.979592	1.01493	1.16129
	3.5	1.17073	0.869565	1.02857	0.7	0.9	1.04615	1.02326	0.965517	1.02857	1.17647	0.784314	1.03448	1	0.979592	0.895522	0.967742
	4	1.17073	0.869565	1.02857	0.9	1	1.04615	1.2093	1.10345	0.885714	1.0084	0.862745	0.896552	0.916667	1.14286	0.895522	0.83871
	4.5	1.17073	1.13044	1.14286	1	0.95	1.04615	0.744186	0.689655	0.971429	1.0084	1.09804	0.965517	1	0.979592	0.955224	1.16129
	5	1.07317	0.956522	1.14286	1	1.05	1.10769	1.02326	1.10345	1.05714	1.07563	0.705882	0.965517	0.833333	0.897959	0.835821	1.09677
	5.5	1.26829	1.04348	1.25714	1.1	0.85	1.10769	1.2093	1.10345	0.914286	0.941176	0.784314	0.965517	0.833333	0.979592	0.895522	1.03226
	6	0.97561	0.956522	0.914286	0.8	0.95	1.04615	1.02326	1.10345	1.11429	1.14286	0.941176	1.03448	1.08333	0.897959	0.895522	0.83871
	6.5	1.26829	1.13044	1.25714	0.9	1	0.923077	1.2093	1.24138	1.05714	1.0084	0.784314	1.03448	1	0.979592	0.895522	1.09677
	7	1.46341	1.13044	1.25714	0.8	0.9	0.984615	1.2093	0.965517	0.914286	0.907563	0.784314	0.896552	0.833333	0.897959	0.776119	0.83871
	7.5	0.97561	1.21739	1.25714	1.1	1.05	1.16923	1.30233	0.965517	0.914286	0.907563	0.862745	0.965517	1.08333	0.897959	0.955224	1.03226
	8	1.07317	1.21739	1.02857	1	1.05	1.04615	1.02326	0.827586	0.914286	0.941176	0.941176	0.965517	1.16667	1.14286	0.835821	0.967742
	8.5	1.36585	0.956522	1.37143	1	1	1.16923	1.02326	0.827586	0.971429	1.07563	0.862745	0.827586	1.08333	0.979592	0.955224	0.967742
	9	0.97561	1.04348	1.14286	0.9	1.05	0.984615	1.11628	0.827586	1	0.97479	0.784314	0.896552	0.916667	0.816327	0.776119	0.903226
	9.5	0.97561	1.30435	1.25714	0.7	0.95	0.984615	0.930233	1.24138	0.942857	0.97479	0.784314	0.827586	0.75	0.979592	0.776119	1.09677
	10	1.17073	1.04348	1.14286	1.4	1.1	0.923077	1.02326	1.10345	0.914286	0.941176	0.705882	0.896552	0.833333	0.734694	0.895522	1.09677
	10.5	0.878049	1.13044	1.25714	1.3	1.15	0.861538	1.02326	0.965517	1.11429	0.907563	0.784314	0.965517	0.833333	0.979592	0.776119	1.03226
	11	1.07317	1.30435	1.14286	1	1.05	0.984615	1.30233	0.827586	1	1.04202	1.17647	0.965517	1	0.897959	1.01493	0.774194
	11.5	0.878049	1.13044	0.914286	1.1	1.05	0.861538	0.837209	1.37931	1	0.941176	1.01961	0.896552	1.16667	0.816327	0.835821	0.967742
	12	0.878049	1.21739	1.14286	0.9	1.1	1.10769	1.2093	1.10345	1.02857	0.97479	0.784314	0.827586	0.916667	0.734694	0.895522	0.967742
	12.5	1.26829	1.04348	1.02857	1	0.95	1.10769	1.11628	1.24138	0.971429	0.941176	0.941176	0.896552	1	0.816327	0.895522	0.967742
	13	0.97561	1.04348	0.914286	1.1	1.05	1.10769	1.2093	1.65517	0.914286	1.0084	0.784314	0.758621	0.75	0.897959	0.835821	0.903226
	13.5	0.97561	0.956522	1.14286	1.1	1.1	1.10769	0.837209	1.10345	1.05714	0.941176	0.941176	0.896552	0.833333	0.816327	0.776119	0.83871
	14	1.17073	1.13044	0.8	1.3	1.05	1.16923	1.11628	1.37931	0.914286	0.97479	1.09804	0.896552	1	0.897959	0.895522	0.709677
	14.5	1.07317	0.956522	1.02857	1.1	1.15	1.04615	1.11628	1.37931	0.857143	0.941176	0.784314	0.827586	1.08333	0.734694	0.895522	0.709677
	15	0.682927	0.869565	1.02857	1.2	1.1	0.923077	1.02326	0.965517	1.05714	1.0084	0.784314	0.689655	1	1.14286	0.835821	0.903226
	15.5	0.585366	0.782609	1.02857	1.1	0.95	1.04615	1.2093	0.965517	0.914286	0.840336	0.941176	0.896552	0.833333	0.816327	0.955224	0.645161
	16	0.682927	1.13044	0.914286	1.2	1	0.984615	0.744186	0.965517	1	0.97479	1.17647	0.896552	1	0.979592	0.955224	0.83871
	16.5	0.585366	1.04348	0.914286	1.4	1	0.984615	1.02326	0.965517	0.885714	1.0084	0.862745	0.689655	0.916667	0.734694	0.716418	0.83871
	17	0.585366	0.956522	0.914286	1.1	0.95	1.16923	1.2093	0.689655	0.942857	0.87395	1.01961	0.896552	1	0.979592	0.776119	0.903226
	17.5	0.780488	0.782609	0.8	1	1.1	1.04615	1.11628	1.10345	0.885714	1.04202	1.09804	0.896552	1	1.06122	0.895522	0.774194
	18	0.780488	0.869565	0.914286	0.9	0.9	1.10769	1.02326	1.10345	0.914286	0.87395	0.705882	0.827586	0.916667	1.14286	0.776119	1.09677
	18.5	0.878049	0.869565	1.02857	1.2	0.9	1.10769	1.02326	1.37931	0.942857	0.97479	1.01961	0.827586	1.08333	1.14286	0.776119	0.903226
	19	0.97561	0.695652	0.914286	1.5	1.05	1.10769	1.11628	1.10345	0.971429	0.907563	0.862745	0.689655	1	0.979592	0.835821	0.774194
	19.5	0.585366	0.782609	1.02857	1	1	0.861538	0.837209	1.10345	1.05714	0.97479	0.941176	0.689655	1.41667	0.979592	0.776119	0.709677
	20	0.97561	0.782609	0.914286	1.4	0.85	1.16923	0.55814	1.10345	1	0.941176	1.17647	0.896552	1	0.979592	0.835821	0.83871
	20.5	0.878049	0.956522	1.02857	1.7	1.15	1.10769	0.837209	1.24138	0.971429	0.941176	1.01961	0.896552	1.08333	0.979592	0.835821	0.83871
	21	0.682927	0.956522	1.02857	1.3	1.05	0.923077	1.2093	0.827586	0.971429	1.14286	1.01961	0.827586	1	0.979592	0.835821	0.83871
	21.5	0.780488	0.695652	1.14286	1.5	0.75	0.923077	0.837209	1.37931	0.914286	0.941176	1.01961	0.689655	1	1.06122	0.835821	0.774194
	22	0.97561	0.695652	0.914286	1.4	0.85	0.861538	0.930233	1.65517	0.857143	1.04202	1.2549	0.896552	1.08333	0.979592	0.895522	0.709677
	22.5	0.878049	0.956522	1.14286	1.1	0.9	0.861538	0.744186	1.37931	0.942857	1.04202	1.01961	0.689655	1.25	0.897959	0.895522	0.580645
	23	0.878049	0.869565	1.02857	1.2	0.95	0.861538	0.930233	0.965517	0.885714	1.04202	0.941176	0.758621	1.08333	1.14286	0.835821	0.709677
	23.5	0.878049	0.695652	1.25714	1.3	0.9	0.923077	1.11628	1.37931	0.885714	0.941176	0.862745	0.758621	1	0.897959	0.835821	0.903226
	24	0.878049	1.13044	1.14286	0.9	0.75	0.861538	0.837209	1.10345	0.857143	0.941176	0.862745	0.62069	1	1.06122	0.776119	0.709677
	24.5	0.682927	0.782609	1.02857	1.1	0.85	0.8	1.02326	1.24138	0.8	0.97479	1.01961	0.758621	1	0.979592	0.955224	0.774194
	25	0.780488	0.869565	1.14286	1	0.9	0.984615	0.837209	1.10345	0.828571	1.14286	0.941176	1.10345	1	0.979592	0.895522	0.709677
	25.5	0.682927	0.782609	1.02857	1	0.9	0.738462	0.744186	1.10345	0.885714	0.941176	1.09804	0.62069	1.08333	0.979592	0.716418	0.83871
	26	0.780488	0.782609	1.14286	1.1	0.9	0.861538	1.30233	1.24138	0.771429	0.941176	1.09804	0.827586	0.916667	0.816327	0.835821	0.709677
	26.5	0.878049	0.956522	1.14286	1.3	0.95	0.984615	1.02326	1.24138	0.8	0.87395	1.09804	0.827586	1	0.979592	0.955224	0.645161
	27	0.780488	0.869565	1.02857	1.3	0.9	1.10769	0.930233	1.24138	0.857143	0.806723	0.862745	1.17241	0.75	0.816327	0.955224	0.903226
	27.5	0.878049	0.956522	1.02857	1.2	0.8	0.923077	0.837209	0.965517	0.8	1.04202	1.09804	1.17241	0.916667	0.734694	0.955224	0.709677
	28	0.878049	0.956522	1.14286	1	0.65	0.923077	0.744186	1.37931	0.8	0.907563	0.862745	1.03448	0.75	0.897959	0.895522	0.774194
	28.5	0.780488	1.04348	1.02857	1.1	0.8	0.984615	1.02326	0.827586	0.771429	0.87395	1.17647	1.03448	0.916667	0.897959	0.835821	0.709677
	29	0.682927	1.04348	1.14286	1	0.8	0.984615	0.744186	0.689655	0.885714	0.840336	1.01961	0.758621	0.833333	1.06122	0.835821	0.903226
	29.5	0.878049	1.13044	1.02857	1.1	0.8	0.861538	0.930233	1.24138	0.857143	0.941176	1.09804	0.827586	0.916667	0.897959	0.716418	0.709677
	30	0.878049	0.956522	1.14286	1.1	0.75	0.738462	1.11628	0.965517	0.8	0.907563	1.33333	1.03448	0.833333	1.14286	0.895522	0.709677
	30.5	0.878049	0.782609	1.14286	1.1	0.75	0.861538	0.651163	1.24138	1.02857	0.840336	1.01961	0.965517	1	0.816327	0.955224	0.83871
	31	0.878049	0.956522	0.914286	1.1	0.7	0.923077	0.837209	1.37931	0.828571	0.907563	1.01961	0.62069	1.08333	0.653061	1.07463	0.580645
	31.5	0.585366	1.04348	1.14286	0.9	0.75	0.923077	0.55814	0.827586	0.771429	0.941176	1.09804	0.896552	0.916667	0.816327	0.955224	0.645161
	32	0.585366	0.869565	1.14286	1.1	0.8	0.738462	0.930233	1.10345	0.914286	0.941176	0.941176	0.827586	0.833333	1.06122	0.955224	0.645161
	time (min)	Tyramine
	0	1.10769	1.0303	0.923077	0.9	0.965517	0.984615	1.08333	1.0625	1.08333	1.18919	0.947368	1	0.888889	1.14286	0.90566	1.04762	0.777778	0.962963	1.04348	1.09091	0.680851	0.916667	0.897959	1.04348	0.935065	0.862745	0.780488	1.25714	1.09091	0.846154
	0.5	0.861538	1.0303	1.02564	0.9	0.965517	1.04615	1.08333	1.0625	1.08333	0.972973	1.15789	0.909091	0.888889	0.914286	1.13207	1.14286	1	1.03704	1.56522	0.848485	1.02128	1	1.14286	1.13044	0.987013	1.09804	1.36585	0.914286	0.818182	1
	1	0.984615	1.15152	1.02564	1	0.965517	1.04615	1	1	1	0.864865	1.05263	1.09091	1.33333	1.14286	0.981132	0.857143	1.11111	1.11111	0.869565	1.09091	1.10638	1.08333	0.979592	0.956522	0.987013	1.01961	0.780488	0.914286	1.09091	1
	1.5	1.04615	0.787879	1.02564	1.2	1.10345	0.923077	0.833333	0.875	0.833333	0.972973	0.842105	1	0.888889	0.8	0.981132	0.952381	1.11111	0.888889	0.521739	0.969697	1.19149	1	0.979592	0.869565	1.09091	1.01961	1.07317	0.914286	1	1.15385
	2	0.738462	1.09091	0.923077	1.2	1.03448	0.861538	1	0.6875	1	1.18919	0.842105	0.818182	0.740741	1.02857	1.13207	0.952381	1.11111	1.18518	1.04348	0.969697	1.19149	1.16667	1.06122	0.956522	0.831169	1.01961	0.878049	1.14286	0.818182	0.769231
	2.5	0.984615	0.969697	1.23077	0.8	0.827586	1.10769	0.75	0.9375	0.75	1.51351	0.947368	0.727273	0.888889	1.02857	0.830189	1.04762	1.33333	0.814815	1.21739	0.727273	1.19149	1.08333	1.22449	0.782609	1.14286	1.2549	1.17073	0.914286	1.09091	0.923077
	3	0.615385	0.787879	1.23077	0.8	1.03448	1.04615	0.916667	1	0.916667	1.51351	1.47368	0.636364	1.03704	0.8	0.754717	0.666667	1.22222	0.962963	1.04348	0.484848	1.61702	1.25	1.38776	1.04348	1.03896	1.09804	1.36585	1.02857	1.27273	1.15385
	3.5	0.984615	0.848485	1.23077	1.2	0.896552	1.10769	0.666667	0.8125	0.666667	1.18919	1.26316	0.363636	0.888889	0.914286	0.679245	0.952381	1.33333	0.888889	0.347826	0.484848	1.3617	1.16667	1.38776	0.956522	1.14286	1.17647	1.26829	1.25714	1.18182	1.15385
	4	1.10769	0.787879	1.1282	1.3	0.827586	1.23077	0.916667	0.6875	0.916667	1.51351	0.947368	0.727273	0.888889	0.8	0.830189	0.857143	1.11111	0.888889	1.21739	0.363636	1.61702	1	1.38776	1.04348	1.09091	1.01961	0.97561	0.685714	1.18182	1
	4.5	0.861538	0.666667	1.02564	1.1	0.758621	1.04615	1.08333	0.5625	1.08333	1.2973	1.05263	1	0.740741	0.8	0.981132	1.23809	1.22222	0.888889	0.521739	0.363636	1.19149	1.08333	1.06122	0.956522	1.1948	1.09804	1.07317	0.8	1.09091	0.846154
	5	0.861538	0.909091	1.23077	1.4	0.965517	1.10769	1.25	0.5625	1.25	1.51351	1.05263	0.454545	0.740741	1.02857	0.981132	1.42857	1	0.888889	0.695652	0.606061	1.3617	1.33333	1.06122	1.04348	1.03896	1.09804	1.07317	1.02857	1.27273	0.615385
	5.5	0.861538	0.848485	1.1282	1.5	0.758621	1.10769	0.75	0.6875	0.75	1.51351	1.05263	0.818182	0.740741	1.02857	1.20755	1.23809	1.33333	0.962963	0.695652	0.848485	1.10638	1	1.22449	1.30435	0.935065	1.09804	1.17073	1.14286	1.54546	0.692308
	6	0.861538	0.969697	1.23077	1.5	0.758621	1.04615	1.25	0.75	1.25	1.18919	0.736842	0.727273	0.740741	1.02857	1.0566	1.42857	1.11111	0.814815	0.869565	0.969697	1.10638	1.16667	1.14286	1.13044	0.935065	1.33333	0.97561	1.25714	1.63636	0.769231
	6.5	0.984615	0.848485	1.23077	1.4	0.758621	0.923077	1	0.75	1	1.2973	1.26316	0.454545	1.03704	1.14286	1.13207	1.71429	1	0.962963	1.3913	0.727273	0.93617	1.08333	1.14286	0.695652	1.03896	1.09804	1.26829	0.8	1.54546	1
	7	0.8	1.15152	1.23077	1	0.827586	1.23077	0.916667	0.6875	0.916667	1.2973	1.26316	0.454545	1.03704	0.914286	0.754717	1.71429	1	0.740741	1.04348	0.969697	0.851064	1	1.22449	1.04348	0.935065	1.17647	1.17073	1.14286	1.45454	0.769231
	7.5	0.861538	1.0303	1.33333	1.2	0.896552	0.984615	1.08333	0.8125	1.08333	1.2973	1.15789	0.727273	1.03704	1.25714	1.0566	1.42857	1	0.962963	1.04348	0.969697	0.93617	1.16667	1.30612	1.04348	0.935065	0.941176	0.97561	0.8	1.18182	0.769231
	8	0.861538	1.0303	1.4359	1.3	0.827586	1.04615	1.08333	0.875	1.08333	1.2973	1.15789	0.818182	1.18518	1.14286	0.981132	1.33333	0.666667	0.888889	1.04348	0.727273	0.851064	1.25	1.14286	1.21739	1.09091	1.17647	1.26829	0.8	1.45454	0.769231
	8.5	0.8	1.0303	1.23077	1.1	1.10345	1.16923	1.08333	0.9375	1.08333	1.18919	0.842105	0.909091	1.18518	1.02857	0.981132	1.42857	0.888889	0.888889	0.869565	0.606061	0.93617	0.916667	1.06122	1.21739	1.03896	0.862745	1.46341	0.914286	1.54546	0.769231
	9	1.04615	1.09091	1.23077	1.3	0.896552	0.984615	1.08333	0.8125	1.08333	1.08108	1.26316	0.909091	1.18518	0.914286	1.20755	1.23809	0.777778	0.962963	0.695652	0.606061	1.02128	0.916667	1.22449	1.13044	0.883117	0.862745	1.26829	1.02857	1.81818	0.846154
	9.5	0.984615	0.969697	1.33333	1.2	0.758621	1.23077	0.916667	0.875	0.916667	1.18919	1.15789	0.727273	1.18518	0.914286	1.28302	0.952381	1	0.814815	1.04348	0.848485	0.851064	1.08333	1.22449	1.3913	0.987013	1.09804	1.46341	1.02857	1.63636	0.769231
	10	0.861538	0.969697	1.33333	1.3	0.827586	1.23077	0.75	0.6875	0.75	1.40541	0.947368	0.818182	1.33333	1.25714	1.35849	1.23809	0.888889	1.03704	0.869565	0.727273	1.02128	0.833333	0.816327	1.30435	0.779221	1.01961	1.36585	1.02857	1.36364	1.15385
	10.5	0.923077	1.0303	1.33333	1.2	0.896552	1.04615	0.833333	0.8125	0.833333	1.18919	1.05263	0.727273	1.18518	1.14286	1.13207	0.761905	0.888889	1.11111	1.21739	0.727273	0.851064	0.833333	1.06122	1.3913	0.935065	0.784314	1.17073	0.914286	1.27273	1
	11	0.861538	1.0303	1.33333	1.1	0.758621	1.16923	1	0.6875	1	1.2973	0.947368	0.454545	1.33333	1.14286	1.28302	0.761905	1	1.11111	0.695652	0.606061	0.851064	0.75	1.06122	0.869565	0.883117	0.784314	1.36585	0.8	1.54546	1
	11.5	0.984615	1.09091	1.33333	1.2	0.758621	0.923077	0.916667	0.8125	0.916667	1.08108	0.947368	0.545455	1.03704	1.25714	1.43396	0.666667	0.777778	1.03704	0.869565	0.727273	1.02128	0.916667	0.816327	1.04348	0.779221	0.784314	1.26829	0.8	1.36364	1.07692
	12	0.923077	0.969697	1.33333	1.4	0.896552	0.923077	0.833333	0.6875	0.833333	1.08108	0.947368	0.636364	1.18518	1.02857	1.50943	0.952381	1.11111	1.18518	0.695652	0.727273	0.93617	0.833333	0.816327	1.04348	0.831169	0.784314	0.97561	1.14286	0.909091	0.923077
	12.5	0.861538	1.09091	1.33333	1.2	0.758621	0.923077	0.916667	0.875	0.916667	0.864865	1.05263	0.727273	1.33333	1.14286	1.35849	0.666667	1.11111	0.962963	1.04348	0.484848	1.02128	0.916667	0.979592	1.13044	0.831169	1.01961	1.17073	1.02857	1.27273	1
	13	0.923077	0.909091	1.4359	1.2	0.758621	0.984615	1.08333	0.875	1.08333	0.972973	1.05263	0.545455	1.33333	0.914286	1.28302	0.857143	0.666667	1.03704	1.04348	0.727273	1.10638	0.916667	1.06122	0.869565	0.675325	0.941176	1.26829	1.25714	1.27273	0.846154
	13.5	0.676923	0.848485	1.1282	1.2	0.896552	0.861538	0.833333	1	0.833333	0.972973	1.05263	0.818182	1.18518	1.14286	1.13207	0.761905	1	1.03704	0.869565	0.727273	0.93617	0.916667	0.897959	1.13044	0.831169	1.01961	1.36585	1.14286	1.09091	0.692308
	14	0.615385	0.848485	1.02564	1.2	0.827586	0.923077	0.75	1.0625	0.75	0.864865	0.842105	0.909091	1.48148	1.14286	1.0566	0.761905	0.777778	1.03704	0.521739	0.606061	0.93617	0.833333	0.734694	0.869565	0.831169	0.941176	1.17073	0.914286	1.27273	1.15385
	14.5	0.676923	0.787879	1.4359	1.1	0.827586	0.984615	0.666667	0.8125	0.666667	0.972973	0.736842	0.363636	1.33333	1.02857	0.981132	0.666667	0.888889	0.962963	0.521739	0.727273	1.02128	0.916667	0.816327	0.782609	0.831169	0.941176	1.17073	0.685714	1.18182	1.23077
	15	0.8	0.909091	1.4359	1.2	0.827586	1.10769	0.666667	1	0.666667	0.756757	0.947368	0.727273	1.18518	1.02857	1.13207	0.857143	1.22222	0.888889	0.869565	0.848485	1.02128	0.916667	0.897959	0.782609	0.519481	0.862745	1.17073	0.914286	1.27273	1.07692
	15.5	0.8	0.969697	1.33333	1.1	0.758621	0.923077	0.75	0.9375	0.75	0.864865	0.947368	0.636364	1.33333	1.02857	0.981132	0.857143	1.11111	0.740741	1.04348	0.727273	1.2766	0.75	0.816327	0.608696	0.779221	0.784314	1.07317	1.37143	1.36364	1
	16	0.8	1.0303	1.64103	1.2	0.827586	0.8	0.916667	1	0.916667	0.864865	0.947368	0.545455	1.33333	0.8	0.981132	0.857143	0.888889	0.962963	0.521739	0.606061	1.2766	0.916667	0.979592	0.521739	0.623377	0.784314	1.56098	1.02857	1.27273	1.15385
	16.5	0.861538	0.848485	1.33333	1.2	1.10345	1.10769	0.75	0.9375	0.75	0.756757	1.05263	0.727273	1.03704	1.14286	0.754717	0.571429	1	0.814815	1.04348	0.727273	1.02128	0.666667	0.979592	0.608696	0.519481	0.862745	1.07317	1.02857	1.54546	1.07692
	17	0.738462	0.848485	1.02564	1.3	0.758621	1.10769	0.666667	1	0.666667	1.08108	1.05263	0.636364	1.33333	0.914286	0.754717	0.666667	0.666667	0.814815	0.695652	0.606061	1.3617	0.833333	0.734694	0.695652	0.571429	0.784314	1.07317	1.14286	1.45454	1
	17.5	0.861538	0.969697	1.02564	1.1	0.689655	0.923077	0.75	0.875	0.75	0.756757	0.842105	0.545455	1.18518	1.02857	0.603774	0.857143	0.888889	0.814815	0.695652	0.606061	1.3617	1	0.897959	0.434783	0.571429	0.941176	1.26829	0.685714	1.36364	1
	18	0.923077	0.787879	1.23077	1	0.827586	1.10769	0.833333	0.8125	0.833333	0.972973	1.05263	0.454545	1.18518	1.02857	0.45283	0.666667	0.888889	0.888889	0.521739	0.606061	1.2766	0.916667	0.816327	0.608696	0.571429	0.862745	0.97561	0.8	1.27273	1.07692
	18.5	0.984615	0.848485	1.64103	1.1	0.965517	1.04615	0.333333	0.9375	0.333333	0.756757	1.05263	0.454545	1.48148	1.02857	0.679245	0.952381	0.777778	0.814815	0.521739	0.606061	0.765957	1	1.06122	0.521739	0.571429	0.941176	1.07317	1.25714	1.27273	0.846154
	19	0.861538	0.606061	1.23077	1.4	0.689655	0.984615	0.583333	1.0625	0.583333	0.756757	0.842105	0.454545	1.03704	1.14286	0.679245	0.761905	0.666667	0.592593	0.695652	0.606061	1.53191	1.08333	0.897959	0.521739	0.519481	1.01961	1.07317	1.02857	1.27273	1.07692
	19.5	0.861538	0.787879	1.33333	1.1	0.689655	1.04615	0.5	1.0625	0.5	1.08108	1.05263	0.545455	1.03704	0.914286	0.603774	0.666667	0.666667	0.814815	0.347826	0.606061	1.44681	0.916667	0.979592	0.521739	0.571429	0.941176	0.97561	0.685714	1.36364	0.923077
	20	0.984615	0.787879	1.1282	1.1	0.62069	1.04615	0.833333	1.0625	0.833333	0.756757	1.05263	0.181818	1.18518	0.914286	0.754717	0.952381	0.555556	0.666667	0.347826	0.969697	1.53191	1	0.979592	0.434783	0.571429	0.862745	1.07317	0.914286	1.09091	0.923077
	20.5	0.923077	0.848485	1.1282	1.2	0.689655	0.984615	0.666667	1	0.666667	0.864865	0.842105	0.545455	1.03704	1.25714	0.90566	0.761905	0.444444	0.592593	0.347826	0.484848	1.10638	0.916667	0.897959	0.347826	0.571429	0.862745	0.97561	0.8	1.27273	0.692308
	21	0.861538	0.666667	1.33333	1.2	0.758621	0.861538	0.75	1	0.75	0.864865	0.842105	0.454545	1.03704	1.02857	0.830189	1.04762	0.444444	0.666667	0.521739	0.606061	1.2766	1.08333	0.816327	0.521739	0.675325	0.941176	0.878049	0.8	1.09091	0.846154
	21.5	0.923077	0.787879	1.1282	0.9	0.758621	0.984615	0.75	1	0.75	1.08108	0.947368	0.272727	1.18518	1.02857	0.90566	0.952381	0.666667	0.666667	0.695652	0.606061	1.3617	1.25	0.897959	0.608696	0.675325	0.784314	1.07317	1.48571	1.36364	0.923077
	22	0.861538	0.666667	1.02564	0.9	0.689655	0.984615	0.583333	0.8125	0.583333	1.08108	0.631579	0.636364	0.740741	1.14286	0.830189	1.04762	0.777778	0.666667	0.347826	0.606061	1.3617	1.25	0.816327	0.347826	0.831169	0.784314	1.07317	1.02857	1.18182	1.07692
	22.5	0.8	0.727273	0.820513	1.2	0.689655	0.738462	0.583333	0.875	0.583333	1.08108	0.842105	0.545455	1.18518	0.914286	0.830189	0.952381	0.666667	0.888889	0.173913	0.242424	1.2766	1.41667	0.653061	0.347826	0.935065	0.705882	0.878049	0.914286	1.36364	0.923077
	23	0.8	0.787879	1.4359	1.2	0.758621	0.8	0.75	0.9375	0.75	0.972973	0.736842	0.363636	1.18518	0.914286	0.45283	0.857143	0.777778	0.740741	0.173913	0.363636	1.10638	1.33333	0.571429	0.434783	0.935065	0.705882	0.780488	1.02857	1.09091	0.769231
	23.5	0.8	0.727273	1.33333	1	0.62069	0.8	0.75	0.8125	0.75	1.2973	0.631579	0.363636	0.888889	0.914286	0.754717	0.761905	0.555556	0.888889	0.347826	0.484848	0.765957	1.33333	0.653061	0.26087	0.779221	0.784314	1.07317	0.8	1.27273	1
	24	0.861538	0.545455	1.1282	1	0.689655	0.615385	0.75	0.875	0.75	0.756757	0.631579	0.363636	0.592593	0.914286	0.679245	0.571429	0.777778	0.518519	0.521739	0.484848	0.851064	1.33333	0.571429	0.347826	0.727273	0.705882	0.97561	0.914286	1	0.846154
	24.5	0.8	0.545455	0.923077	0.9	0.482759	0.8	0.666667	0.8125	0.666667	0.864865	0.631579	0.545455	0.888889	0.8	0.754717	0.285714	0.666667	0.592593	0.521739	0.484848	1.02128	1.41667	0.897959	0.26087	0.883117	0.627451	0.878049	1.02857	1.36364	0.923077
	25	0.738462	0.545455	1.1282	0.7	0.413793	0.553846	0.75	0.8125	0.75	1.08108	0.421053	0.363636	1.33333	0.685714	0.754717	0.571429	0.666667	0.814815	0.521739	0.848485	1.02128	1.33333	0.653061	0.173913	0.779221	0.705882	0.682927	1.14286	1.27273	0.769231
	25.5	0.738462	0.363636	0.923077	1	0.551724	0.676923	0.583333	0.625	0.583333	0.756757	0.631579	0.363636	1.18518	1.02857	0.528302	0.571429	0.777778	0.814815	0.347826	0.242424	0.851064	1.08333	0.816327	0.434783	0.779221	0.627451	0.780488	1.02857	1.09091	0.461538
	26	0.8	0.666667	0.923077	0.7	0.62069	0.923077	0.583333	0.625	0.583333	1.18919	0.947368	0.636364	0.888889	1.02857	0.754717	0.47619	0.666667	0.740741	0.173913	0.606061	1.10638	1.16667	0.734694	0.347826	0.727273	0.784314	0.682927	0.8	1.18182	0.538462
	26.5	0.615385	0.606061	1.02564	0.9	0.482759	0.615385	0.666667	0.5625	0.666667	0.972973	0.526316	0.454545	0.888889	0.914286	0.603774	0.380952	0.777778	0.740741	0.695652	0.606061	1.19149	1.16667	0.571429	0.347826	0.623377	0.705882	0.682927	1.02857	1.09091	0.692308
	27	0.8	0.545455	1.23077	0.8	0.482759	0.676923	0.5	0.5	0.5	0.972973	0.631579	0.545455	0.740741	0.914286	0.603774	0.666667	0.888889	0.888889	1.04348	0.363636	0.851064	0.916667	0.489796	0.347826	0.831169	0.705882	0.780488	0.8	1.27273	0.923077
	27.5	0.738462	0.727273	1.23077	0.9	0.482759	0.738462	0.75	0.5	0.75	1.08108	0.631579	0.363636	0.888889	0.8	0.377358	0.666667	1	0.666667	0.521739	0.606061	1.19149	0.833333	0.571429	0.173913	0.779221	0.784314	0.780488	1.25714	1.09091	0.769231
	28	0.738462	0.606061	1.02564	0.9	0.413793	0.615385	0.5	0.375	0.5	0.648649	0.631579	0.272727	0.888889	0.685714	0.45283	0.666667	0.777778	0.592593	0.695652	0.606061	0.93617	1.08333	0.571429	0.26087	0.727273	0.705882	0.780488	1.25714	0.909091	0.846154
	28.5	0.8	0.545455	0.923077	0.8	0.482759	0.615385	0.333333	0.5625	0.333333	0.864865	0.631579	0.909091	0.740741	0.8	0.754717	0.571429	0.777778	0.666667	0.869565	0.484848	1.02128	0.75	0.489796	0.26087	0.623377	0.54902	0.97561	1.02857	1.09091	0.769231
	29	0.8	0.606061	1.02564	0.7	0.62069	0.676923	0.5	0.5	0.5	0.864865	0.736842	0.363636	1.03704	0.914286	0.679245	0.761905	0.888889	0.592593	0.173913	0.363636	1.10638	1.16667	0.571429	0.26087	0.571429	0.627451	0.878049	1.14286	1.27273	0.615385
	29.5	0.738462	0.666667	1.1282	1	0.551724	0.615385	0.416667	0.5625	0.416667	0.756757	0.736842	0.454545	1.18518	0.571429	0.679245	0.571429	0.666667	0.740741	0.347826	0.242424	1.02128	1.16667	0.489796	0.173913	0.675325	0.627451	0.682927	0.914286	1.27273	0.692308
	30	0.430769	0.606061	1.02564	0.8	0.482759	0.738462	0.333333	0.3125	0.333333	0.972973	0.421053	0.272727	1.33333	0.685714	0.754717	0.571429	0.666667	0.37037	0.695652	0.484848	1.02128	0.833333	0.571429	0.347826	0.727273	0.627451	0.682927	0.8	1.18182	0.692308
	30.5	0.615385	0.727273	1.02564	1	0.551724	0.553846	0.666667	0.5	0.666667	0.864865	0.315789	0.363636	1.18518	0.685714	0.528302	0.571429	0.666667	0.814815	0.347826	0.606061	1.10638	0.916667	0.489796	0.347826	0.623377	0.470588	0.585366	1.48571	1.09091	0.769231
	31	0.676923	0.787879	0.923077	0.9	0.551724	0.553846	0.416667	0.625	0.416667	0.756757	0.526316	0.363636	0.740741	0.685714	0.528302	0.47619	0.444444	0.666667	0.695652	0.484848	1.02128	0.916667	0.244898	0.347826	0.727273	0.470588	0.487805	1.02857	1.18182	0.846154
	31.5	0.676923	0.787879	1.02564	0.9	0.551724	0.676923	0.416667	0.625	0.416667	0.756757	0.526316	0.636364	0.740741	0.457143	0.603774	0.47619	0.666667	0.814815	0.695652	0.242424	0.93617	1	0.571429	0.26087	0.467532	0.627451	0.585366	0.8	1.18182	0.846154
	32	0.738462	0.848485	1.02564	1.1	0.344828	0.553846	0.416667	0.5625	0.416667	0.864865	0.631579	0.727273	0.740741	0.685714	0.45283	0.285714	0.555556	0.592593	0.869565	0.242424	0.851064	0.916667	0.326531	0.26087	0.675325	0.54902	0.585366	0.571429	1.18182	0.846154
