# Supplementary material for: Tyramine induces dynamic RNP granule remodeling and translation activation in the Drosophila brain
Source: eLife. 2021 Apr 23;10:e65742. doi: 10.7554/eLife.65742 (PMC8064753; doi:10.7554/eLife.65742)
Supplement: Figure 2—source data 1. [file elife-65742-fig2-data1.xlsx]

## Sheet: B
B
Me31B partition coefficient
	time (min)	control (hl3 only)
	0	1	1	1	1	1	1	1	1	1	1	1	1	1	1
	0.5	0.944478	0.962962	0.899945	0.856651	0.989677	0.984018	0.921007	0.980893	0.920882	0.890078	1.01544	1.02746	1.007	1.00944
	1	0.979385	0.961358	0.907741	0.861813	0.986969	0.981452	0.822428	0.878113	0.930592	0.912475	1.17555	1.0042	0.97606	0.949269
	1.5	0.976036	0.981953	0.943597	0.875328	0.917517	0.936544	0.897102	0.933384	0.901141	0.864632	1.06055	1.01746	1.03233	0.988342
	2	0.956547	0.95856	0.915002	0.893364	0.920103	0.996797	0.948022	0.93533	0.936435	0.89446	1.08306	1.01379	1.0032	1.01831
	2.5	0.992378	0.987423	0.889069	0.863505	0.96449	1.02495	0.946554	0.935185	0.954136	0.930812	1.02314	1.04819	0.98955	1.24761
	3	1.0134	0.982235	0.908961	0.838747	0.944312	1.05839	0.880669	0.877989	0.867822	0.873579	1.02715	1.05128	1.03031	0.944095
	3.5	0.97413	0.930986	0.906595	0.844997	0.992487	1.0679	0.907359	0.929658	0.894395	0.857261	0.997116	1.04264	0.875044	0.863296
	4	1.02258	0.915611	0.873745	0.89108	0.983283	1.05636	0.860931	0.954458	0.928272	0.915019	1.15891	1.04742	0.94528	1.00101
	4.5	0.992262	0.939318	0.909973	0.949868	0.996274	1.05564	0.931049	0.889126	0.906447	0.837409	1.14168	1.02314	0.993477	0.941979
	5	0.999798	0.958434	0.891792	0.880998	1.04498	1.04133	0.886607	0.914795	0.873601	0.293677	1.06024	0.989109	0.954653	0.912078
	5.5	1.03271	0.956422	0.893994	0.845698	1.05929	1.13541	0.83789	0.889602	0.913815	0.894723	0.990224	1.03394	0.980715	0.915606
	6	1.03205	0.950605	0.895214	0.832485	1.07373	1.05473	0.866826	0.876664	0.92868	0.87685	0.98094	1.00611	0.964755	0.894205
	6.5	0.998066	0.915328	0.926964	0.848116	1.07318	1.03355	0.862637	0.900718	0.906833	0.916594	1.03119	1.00006	0.921372	0.879321
	7	1.06722	0.94743	0.941306	0.836958	1.13422	1.09836	0.872204	0.869874	0.877554	0.819355	0.989028	1.01592	0.89721	0.857282
	7.5	1.05844	0.929885	0.962552	0.829004	1.14316	1.0913	0.854539	0.856294	0.868896	0.852717	1.04434	1.01293	0.882295	0.83877
	8	1.01022	0.962302	0.916385	0.866817	1.12608	1.0511	0.849227	0.87182	0.816825	0.84058	0.983859	1.12393	0.889959	0.861582
	8.5	1.03358	0.945134	0.937676	0.864617	1.1714	1.08867	0.819124	0.848159	0.821551	0.8923	1.03583	1.11918	0.916717	0.874618
	9	1.01963	0.963748	0.908113	0.821146	1.13666	1.15041	0.859808	0.886538	0.869734	0.852636	1.03274	1.02752	0.88068	0.863061
	9.5	1.05936	0.403836	0.936962	0.805757	1.1578	1.12095	0.88082	0.854348	0.820197	0.865541	1.03116	1.10573	0.895785	0.886108
	10	1.05402	0.41657	1.00165	0.891515	1.20485	1.20717	0.880906	0.850353	0.805203	0.828079	0.982417	1.08318	0.924	0.887082
	10.5	1.03138	0.94416	0.97374	0.872052	1.1973	1.1612	0.914313	0.847351	0.874954	0.823778	1.00534	1.04714	0.920073	0.888493
	11	1.05134	0.908096	0.969351	0.910337	1.17364	1.19967	0.861968	0.820916	0.844128	0.822142	0.981046	1.12436	0.870769	0.927902
	11.5	1.033	0.890206	1.0019	0.83558	1.19594	1.1584	0.883605	0.852568	0.897167	0.809702	1.02198	1.09762	0.89398	0.917991
	12	1.01718	0.910391	0.947971	0.815295	1.20312	1.08754	0.883217	0.83934	0.899379	0.838985	1.02127	1.03702	0.92704	0.923904
	12.5	1.05795	0.91973	1.00146	0.784964	1.26742	1.19704	0.885117	0.836276	0.938884	0.878991	1.03921	1.14457	0.911872	0.966807
	13	1.05474	0.937997	0.975853	0.804536	1.26058	1.22277	0.858081	0.838988	0.885459	0.856716	1.04494	1.10906	0.927578	1.17752
	13.5	1.03522	0.935042	0.995447	0.829318	1.28866	1.17035	0.83627	0.855156	0.92737	0.854191	0.998418	1.08861	0.901517	1.12528
	14	1.11041	0.947147	0.948328	0.799736	1.29727	1.16505	0.88922	0.817873	0.903912	0.84058	1.01393	1.0717	0.953608	0.928439
	14.5	1.10821	0.963936	0.9512	0.836716	1.29925	1.12526	0.880604	0.847952	0.928938	0.854555	1.00964	1.04841	0.891099	0.882412
	15	1.11055	0.939664	0.993186	0.804366	1.29748	1.18363	0.871944	0.848138	0.967584	0.851687	1.10638	1.04649	0.884829	0.846699
	15.5	1.07065	0.925295	1.00966	0.819199	1.2929	1.16259	0.892027	0.823276	0.923439	0.867722	1.09976	1.03616	0.872257	0.940702
	16	1.05708	0.95834	0.928645	0.842156	1.27769	1.15116	0.92064	0.853334	0.960323	0.827069	1.07793	1.06723	0.853542	0.891819
	16.5	1.00468	0.942273	0.96398	0.798104	1.3203	1.13075	0.928069	0.845157	0.953879	0.846336	1.09154	0.981427	0.839387	0.872232
	17	1.04137	0.939821	0.907205	0.819127	1.328	1.20653	0.926211	0.865858	0.952783	0.83648	1.07525	1.04856	0.874505	0.871426
	17.5	1.03419	0.974972	0.9616	0.853387	1.32332	1.14356	0.886737	0.853251	0.930872	0.891795	1.09906	0.970907	0.815479	0.833563
	18	1.03678	0.959252	0.954547	0.83581	1.31507	1.14309	0.926751	0.906038	0.96956	0.856433	1.12041	0.917903	0.819722	0.861011
	18.5	1.02324	0.921396	0.9433	0.793777	1.36546	1.15886	0.968148	0.899456	0.975597	0.832361	1.06811	1.00194	0.815035	0.860306
	19	1.02601	0.947272	0.898293	0.796074	1.39501	1.10653	0.912175	0.864367	1.02071	0.863623	1.15294	0.937155	0.916875	0.908953
	19.5	1.03274	0.945355	0.885007	0.761427	1.30489	1.12221	0.905826	0.888588	0.95811	0.828241	1.09189	1.0095	0.869597	0.878381
	20	1.0388	0.971074	0.948552	0.781724	1.29992	1.15455	0.913643	0.880659	0.951	0.863158	1.11316	0.962299	0.809209	0.753805
	20.5	1.03854	0.959126	0.923185	0.792544	1.3135	1.13015	0.931005	0.93856	0.977165	0.895551	1.13599	0.896893	0.835777	0.838098
	21	1.0438	0.946927	0.937527	0.830466	1.35011	1.14237	0.952924	0.93177	1.00771	0.877961	1.13321	0.954339	0.827607	0.78515
	21.5	1.04533	0.940167	0.916043	0.812732	1.3572	1.13557	0.958711	0.891589	1.03671	0.886382	1.05869	0.978465	0.742424	0.836452
	22	1.08102	0.937243	0.921726	0.831325	1.35661	1.10309	0.941544	0.925663	0.971708	0.881657	1.14316	0.910993	0.796194	0.807895
	22.5	1.02041	0.958371	0.970854	0.847959	1.31928	1.09812	0.936987	0.923531	1.01085	0.956076	1.08007	0.943819	0.787485	0.857114
	23	1.06222	0.954473	0.979989	0.798407	1.34799	1.15491	0.982768	0.964581	0.997422	0.905386	0.448817	0.897634	0.773647	0.86558
	23.5	1.05601	0.944726	0.956154	0.826392	1.38965	1.17082	1.00518	0.935682	1.0333	0.884969	1.09111	0.93626	0.759365	0.890475
	24	1.05483	0.981418	0.959368	0.830974	1.38161	1.10199	0.966356	0.917196	0.9797	0.924167	1.0294	0.977602	0.759714	0.905527
	24.5	1.03496	0.966578	0.961972	0.801743	1.34457	1.14017	1.01332	0.937959	0.964254	0.877012	0.987059	1.08173	0.739099	0.84979
	25	1.06346	0.969942	0.9494	0.802323	1.38996	1.12585	1.09484	0.933343	0.980495	0.886887	1.00928	1.01533	0.755059	0.844213
	25.5	1.04853	0.962679	0.94016	0.837671	1.37609	1.18761	1.03496	0.931087	1.03727	0.945473	1.10261	1.02798	0.789639	0.890711
	26	1.04042	0.947115	0.948656	0.797427	1.38098	1.13502	0.990326	0.934192	0.996756	0.910334	1.1159	1.01799	0.744197	0.886612
	26.5	1.05928	0.927716	0.973041	0.813578	1.34219	1.1386	0.981191	0.91612	0.975704	0.929822	1.09959	0.986734	0.804047	0.929279
	27	1.06055	0.959189	0.962031	0.82366	1.37104	1.14977	1.02062	0.938042	1.06821	0.985722	1.06418	1.02154	0.789227	0.862523
	27.5	1.03823	0.970476	0.961734	0.82013	1.39829	1.12062	0.948	0.928416	1.02017	0.915564	1.08007	0.960726	0.775452	0.861851
	28	1.06098	0.988712	0.96883	0.838203	1.42052	1.13561	0.925823	0.943652	1.03813	0.944867	1.21525	0.970567	0.796225	0.918831
	28.5	1.04184	0.947021	0.941604	0.853616	1.41527	1.13146	0.952168	0.938146	1.06518	0.981703	1.08373	0.97066	0.765034	0.90509
	29	1.08255	0.967835	0.947986	0.861402	1.29267	1.13061	0.928608	0.991057	1.07437	0.982733	1.10064	0.958072	0.803477	0.916479
	29.5	0.389779	0.958937	0.943969	0.834903	1.38157	1.16909	0.966226	0.952698	1.08006	0.97518	1.11685	0.85984	0.751069	0.835108
	30	1.08936	0.984122	0.953357	0.081757	1.37587	1.1536	1.02978	0.960213	1.12872	0.952784	1.06407	0.842656	0.759904	0.851571
	30.5	1.06306	1.00789	0.915061	0.794079	1.3722	1.17424	0.939147	1.01849	1.04116	0.950037	1.1407	0.384475	0.737927	0.909793
	31	1.07414	0.976828	0.949236	0.849409	1.44864	1.19522	0.951671	1.01493	1.07001	0.945372	0.444175	0.827106	0.717185	0.860205
	31.5	1.06571	0.97142	0.933793	0.821484	1.35084	1.19053	0.94759	1.02791	1.08962	0.892845	0.442803	0.926912	0.775135	0.862086
	32	1.06291	0.964062	0.934373	0.821557	1.39342	1.15082	0.942191	0.996315	1.08	0.91922	1.17217	0.876531	0.749834	0.867428
	time	Tyramine
	0	1	1	1	1	1	1	1	1	1	1	1	1	1	1	1	1	1	1	1	1	1	1
	0.5	0.875764	0.943145	0.983487	0.986882	0.941782	0.914046	0.991048	0.923321	0.921702	0.907336	0.950805	1.05301	0.927599	0.985811	0.97357	0.950224	0.909776	0.968095	0.981221	0.951522	0.999557	1.02306
	1	1.06925	1.03126	0.961005	1.03132	0.99325	0.918169	0.990984	0.943079	0.988605	0.927561	0.93125	1.01611	0.901747	0.938821	0.862885	0.891714	0.867426	0.866959	0.954121	0.96128	0.919674	0.984393
	1.5	0.955193	0.941537	0.928898	0.974713	0.972895	0.897107	0.989931	0.916458	0.953563	0.903407	0.89104	1.02498	0.917123	0.95702	0.865552	0.957216	0.889063	0.939444	0.958353	0.969903	0.943883	0.963647
	2	0.947047	0.902422	0.960393	0.950101	1.006	0.889932	1.0022	0.91515	0.911097	0.858088	0.906464	1.08139	0.954935	0.966783	0.858311	0.889247	0.891916	0.88538	0.993371	0.998618	0.970746	0.266822
	2.5	0.85947	0.908836	0.998259	0.921567	1.1017	0.870802	1.0559	0.908709	0.89898	0.802967	0.849566	1.17935	0.92603	0.969217	0.824075	0.890824	0.944672	0.979588	1.01144	1.01452	0.919453	0.911314
	3	0.861507	0.901544	1.04872	0.909946	1.03027	0.876667	1.03469	0.90016	0.927682	0.855061	0.869897	1.13062	0.959113	0.989933	0.815164	0.903657	0.828194	0.925556	0.98237	1.04487	0.954172	0.901723
	3.5	0.841141	0.909547	0.091154	0.850093	0.942174	0.914564	1.03972	0.923771	0.943071	0.864402	0.926235	1.06728	0.968613	0.95442	0.738845	0.852379	0.846697	0.926802	0.94036	0.997772	1.01122	0.831791
	4	0.89002	0.949832	0.993743	0.863021	0.950731	0.888	0.963411	0.904754	0.916039	0.869473	0.886367	1.01635	0.918798	0.933123	0.738736	0.883628	0.79592	0.861423	0.935544	0.95406	0.997234	0.896117
	4.5	0.973523	0.933576	1.00172	0.855239	0.944087	0.88229	1.0004	0.874309	0.93946	0.840289	0.877149	0.956155	0.940217	0.906129	0.772039	0.922147	0.822685	0.900677	0.936955	1.00014	0.987586	0.836409
	5	0.973523	0.991767	0.997245	0.874684	0.928071	0.888741	1.01012	0.890259	0.895799	0.844779	0.916945	0.939136	0.920155	0.94886	0.760158	0.898502	0.832234	0.918078	0.92412	1.02764	0.974287	0.855312
	5.5	0.96334	0.944169	0.96751	0.902923	0.803679	0.934521	1.00627	0.817069	0.981339	0.866967	0.931106	0.891542	0.972325	0.952345	0.718746	0.846278	0.796745	0.868286	0.94173	1.0668	0.929875	0.869038
	6	0.894094	0.923504	0.911161	0.86707	0.86577	0.874976	0.96981	0.89622	0.96674	0.810824	0.929555	0.987707	0.294588	0.943771	0.720632	0.814102	0.755846	0.865907	0.956116	1.1148	0.94375	0.813577
	6.5	0.906314	0.930316	0.873888	0.86745	0.858432	0.880548	0.959374	0.846845	0.990478	0.831429	0.844299	0.977478	0.955211	0.979727	0.739409	0.839323	0.803143	0.869873	0.960045	1.03406	0.925074	0.812534
	7	0.869654	0.124658	0.891281	0.946642	0.812388	0.893795	0.959119	0.813681	0.980211	0.834817	0.833709	0.998513	0.925627	0.951045	0.705152	0.799989	0.763976	0.853993	0.97965	0.978113	0.910137	0.840954
	7.5	0.89613	0.955181	0.922029	0.935254	0.851426	0.8594	0.952959	0.833309	0.928923	0.864422	0.811845	0.996161	0.930441	0.991398	0.649538	0.76186	0.752218	0.81283	0.948399	1.01555	0.879534	0.798491
	8	0.828921	0.958127	0.914624	0.892125	0.79824	0.904438	1.00568	0.826708	0.959272	0.848687	0.839698	0.96898	0.962273	0.965234	0.665387	0.789807	0.73731	0.83677	0.91324	0.986014	0.960235	0.804805
	8.5	0.763747	0.917424	0.824867	0.9199	0.762773	0.904352	0.956693	0.842512	0.122885	0.850752	0.850234	0.954247	0.92164	0.931823	0.661311	0.698249	0.712969	0.808524	0.938103	0.981847	0.890399	0.736773
	9	0.824847	0.887983	0.832023	0.916716	0.750569	0.858296	0.928641	0.826112	0.963604	0.84538	0.819566	0.968736	0.929868	0.975661	0.647739	0.718686	0.751971	0.825828	0.932542	0.924272	0.883495	0.769457
	9.5	0.771894	0.907624	0.786522	0.939535	0.741152	0.935384	0.929152	0.804885	0.935489	0.867829	0.852416	0.978832	0.896212	0.977348	0.604787	0.681466	0.736733	0.819628	0.951865	1.01958	0.888695	0.761058
	10	0.788187	0.857603	0.806766	0.883035	0.76202	0.847101	0.941071	0.810861	0.953992	0.824694	0.825483	0.957553	0.927238	0.944242	0.302003	0.672342	0.720835	0.797695	0.941468	0.968005	0.866699	0.746922
	10.5	0.810591	0.903174	0.801829	0.85197	0.751217	0.883739	0.971102	0.787147	0.990929	0.810603	0.819728	0.946503	0.862769	0.967032	0.632952	0.64508	0.709703	0.826654	0.94036	0.973843	0.893474	0.722581
	11	0.816701	0.866734	0.793697	0.93015	0.796944	0.859193	0.944151	0.81656	1.0016	0.796793	0.841412	0.927798	0.904271	0.962385	0.618707	0.604762	0.69933	0.828143	0.931555	0.979516	0.861565	0.759233
	11.5	0.861507	0.855409	0.805446	0.911739	0.65173	0.935435	0.909285	0.812111	0.969313	0.830587	0.817058	1.00182	0.853968	0.914841	0.304193	0.586681	0.716679	0.834278	0.926498	0.920187	0.840256	0.697663
	12	0.855397	0.895255	0.800318	0.850979	0.662337	0.921481	0.889068	0.767025	0.983821	0.107116	0.83766	0.983958	0.855558	0.968885	0.663068	0.574663	0.717339	0.839862	0.897745	0.927676	0.842247	0.737313
	12.5	0.804481	0.880775	0.806555	0.906065	0.737295	0.836769	0.916833	0.783382	0.981339	0.823071	0.797575	0.996561	0.866247	0.992256	0.618815	0.559994	0.694482	0.769562	0.911386	0.933018	0.857472	0.74547
	13	0.822811	0.874632	0.815204	0.868715	0.662051	0.87389	0.887855	0.774775	1.02568	0.849709	0.835441	0.974416	0.883849	1.02102	0.662807	0.553522	0.71851	0.817249	0.889968	0.937846	0.86099	0.692578
	13.5	0.828921	0.883784	0.789545	0.862241	0.651866	0.923447	0.864431	0.750029	0.98513	0.80922	0.808002	0.994985	0.88071	1.01895	0.630307	0.528986	0.694878	0.785636	0.904374	0.984467	0.858777	0.699767
	14	0.873727	0.871184	0.793659	0.884216	0.690889	0.842254	0.829916	0.716051	0.941987	0.85019	0.781412	0.944284	0.845506	1.00581	0.654894	0.535737	0.715096	0.786769	0.955733	1.10502	0.879644	0.700754
	14.5	0.745418	0.816252	0.783633	0.886157	0.676109	0.840495	0.864638	0.728002	0.973329	0.85017	0.800678	0.929373	0.879947	1.03584	0.633147	0.536108	0.703371	0.808249	0.867341	0.970501	0.821557	0.690753
	15	0.706721	0.840532	0.787096	0.93072	0.632189	0.869905	0.865691	0.689546	1.0218	0.842313	0.790287	0.895314	0.867137	1.02547	0.617558	0.540355	0.6975	0.763589	0.910479	0.320695	0.779713	0.674104
	15.5	0.798371	0.796569	0.800203	0.848089	0.660258	0.826557	0.842985	0.652428	0.989869	0.819042	0.758772	0.893627	0.896403	1.04671	0.623824	0.526928	0.710759	0.781718	0.895469	1.02509	0.791352	0.652817
	16	0.757637	0.827389	0.80998	0.832862	0.678429	0.81588	0.882845	0.67665	0.942461	0.83171	0.764941	0.918878	0.875938	0.97024	0.652335	0.575424	0.710347	0.808815	0.863835	1.01372	0.811755	0.65224
	16.5	0.600815	0.830335	0.082735	0.898937	0.672824	0.818536	0.848362	0.694272	0.938445	0.827881	0.770624	0.913952	0.869746	0.988024	0.644053	0.507548	0.723754	0.761792	0.941085	0.999856	0.777323	0.6479
	17	0.708758	0.844794	0.787804	0.917517	0.721219	0.75925	0.86301	0.704304	0.937362	0.869312	0.781773	0.878007	0.897612	0.972729	0.606825	0.537554	0.704245	0.771181	0.872539	1.04961	0.803656	0.645423
	17.5	0.714868	0.80967	0.7817	0.842311	0.75304	0.75185	0.855814	0.710323	0.932556	0.855803	0.780131	0.881779	0.892947	1.01261	0.641516	0.54258	0.739767	0.851873	0.901836	1.02376	0.744684	0.646578
	18	0.684318	0.793686	0.767618	0.89086	0.762185	0.773705	0.825879	0.706572	0.953631	0.838244	0.816878	0.857682	0.878674	1.0349	0.582195	0.55239	0.735364	0.859108	0.924825	1.00668	0.782479	0.712245
	18.5	0.739308	0.779059	0.744121	0.87093	0.694806	0.799079	0.794412	0.69827	0.960264	0.877851	0.758772	0.845789	0.858061	1.0081	0.628334	0.511016	0.725387	0.780537	0.891338	0.980114	0.733597	0.669951
	19	0.680244	0.801354	0.763791	0.833158	0.657667	0.75028	0.822927	0.690666	1.00025	0.860914	0.800155	0.86283	0.873012	1.02395	0.615346	0.556174	0.732692	0.844524	0.889283	1.05543	0.701069	0.674476
	19.5	0.747454	0.752147	0.766355	0.884828	0.708397	0.737067	0.76253	0.642047	1.00237	0.855101	0.780528	0.864538	0.888069	1.00116	0.574823	0.563796	0.747353	0.815954	0.876025	0.315084	0.711204	0.679114
	20	0.678208	0.79893	0.74238	0.826092	0.64159	0.758353	0.764429	0.616764	0.984047	0.918861	0.770786	0.856484	0.893243	1.09127	0.61901	0.542969	0.712474	0.77704	0.923878	1.0158	0.688544	0.675296
	20.5	0.682281	0.775695	0.728431	0.867576	0.687107	0.721457	0.704846	0.617098	0.953382	0.911365	0.775531	0.847364	0.872842	1.06984	0.612549	0.544119	0.680102	0.773091	0.897886	1.02422	0.709522	0.659484
	21	0.574338	0.754842	0.709106	0.813375	0.661464	0.696548	0.709394	0.619599	0.947809	0.860152	0.796331	0.826551	0.896022	1.08812	0.588786	0.500927	0.728025	0.830716	0.905301	0.986653	0.677392	0.641419
	21.5	0.769857	0.770304	0.71542	0.855639	0.67537	0.672244	0.698352	0.593603	0.934744	0.885408	0.775657	0.848451	0.872779	1.05147	0.614566	0.493973	0.710429	0.787513	0.907437	0.996638	0.662897	0.696024
	22	0.688391	0.788754	0.686394	0.829783	0.664823	0.660135	0.684246	0.607444	0.979873	0.879335	0.737232	0.830456	0.934809	1.10651	0.61424	0.527225	0.678321	0.76312	0.900969	1.03507	0.705494	0.671888
	22.5	0.653768	0.763618	0.714234	0.812721	0.642766	0.64392	0.671225	0.593079	0.972223	0.893586	0.769397	0.833651	0.891398	1.10369	0.642665	0.504581	0.692487	0.750202	0.9025	0.946345	0.663252	0.655927
	23	0.596741	0.792662	0.687255	0.815442	0.636724	0.646163	0.652396	0.552661	1.00357	0.870916	0.739596	0.82522	0.848306	1.0414	0.645093	0.530414	0.718823	0.798796	0.871048	1.00021	0.663694	0.652631
	23.5	0.598778	0.782716	0.689207	0.824553	0.666255	0.663654	0.648455	0.546467	0.964687	0.886831	0.750654	0.815745	0.845994	1.08148	0.618447	0.517544	0.717949	0.812004	0.891741	0.971862	0.657122	0.61989
	24	0.657841	0.742452	0.687657	0.803505	0.635488	0.633657	0.619301	0.556572	0.993028	0.90022	0.766312	0.834317	0.814586	1.07556	0.563549	0.565279	0.734111	0.799152	0.88888	0.997751	0.653227	0.253022
	24.5	0.564155	0.752314	0.672522	0.827463	0.663257	0.651752	0.590356	0.526839	0.969832	0.87719	0.79956	0.812705	0.795988	1.0788	0.587052	0.539668	0.691349	0.763799	0.897564	1.01527	0.639508	0.554856
	25	0.606925	0.740446	0.683179	0.841003	0.589956	0.652804	0.595877	0.499273	0.995577	0.862778	0.793841	0.830146	0.872291	1.06071	0.584797	0.519454	0.716481	0.763508	0.878181	0.947397	0.640327	0.597598
	25.5	0.659878	0.745001	0.680673	0.850789	0.595109	0.651648	0.584531	0.495377	1.0076	0.886009	0.76422	0.815656	0.796942	1.04962	0.57491	0.531434	0.677644	0.74253	0.875723	0.935246	0.645682	0.589422
	26	0.594705	0.738043	0.694009	0.872069	0.630004	0.637417	0.570298	0.492483	1.02171	0.884626	0.789927	0.790872	0.750859	0.999143	0.580395	0.517915	0.707461	0.775179	0.853841	0.937804	0.643579	0.595307
	26.5	0.531568	0.770179	0.670053	0.812342	0.582046	0.637228	0.546028	0.463027	0.980166	0.878152	0.788375	0.833119	0.769627	1.09395	0.605004	0.523349	0.706257	0.744699	0.874635	0.907232	0.634197	0.572251
	27	0.598778	0.837084	0.702007	0.831091	0.599283	0.637435	0.553144	0.462736	1.01753	0.881259	0.7817	0.849183	0.754019	1.02852	0.61062	0.540521	0.671427	0.715093	0.885656	0.888543	0.645991	0.571599
	27.5	0.503055	0.740947	0.712799	0.823309	0.546353	0.645559	0.534427	0.45804	0.988086	0.862758	0.826583	0.854753	0.746787	1.00838	0.581718	0.526019	0.734424	0.767425	0.850053	0.89566	0.632515	0.545395
	28	0.291242	0.826281	0.650613	0.803252	0.552169	0.629465	0.517146	0.454842	0.99736	0.828382	0.819782	0.788631	0.724392	1.05427	0.577664	0.474315	0.67649	0.713458	0.869477	0.918888	0.634153	0.566496
	28.5	0.566191	0.741971	0.650116	0.80998	0.54114	0.6216	0.537794	0.453257	0.969448	0.860453	0.798965	0.805583	0.709653	1.01582	0.660769	0.487871	0.68119	0.715837	0.883903	0.922725	0.629329	0.563498
	29	0.429735	0.800372	0.656698	0.80011	0.524295	0.651579	0.52948	0.446234	0.949298	0.856805	0.752512	0.839997	0.714065	1.10256	0.57762	0.474203	0.676457	0.742497	0.870585	0.879095	0.625877	0.5318
	29.5	0.517312	0.8085	0.637851	0.806521	0.544319	0.632588	0.525028	0.426476	0.958392	0.849188	0.775639	0.798593	0.700259	1.06101	0.632518	0.504673	0.705581	0.766729	0.888658	0.886232	0.57923	0.531688
	30	0.572301	0.761132	0.62484	0.809495	0.528288	0.630362	0.515757	0.44891	0.903696	0.849349	0.757653	0.764223	0.693812	1.06292	0.622588	0.524665	0.698407	0.743096	0.878624	0.892627	0.317497	0.554763
	30.5	0.553971	0.786874	0.617952	0.800321	0.544455	0.633209	0.506502	0.479035	0.998059	0.84566	0.742969	0.793512	0.679709	0.990569	0.286284	0.506324	0.683235	0.768429	0.846809	0.879693	0.628599	0.552137
	31	0.600815	0.776239	0.628954	0.801628	0.540356	0.633536	0.500646	0.44494	0.963717	0.90435	0.743997	0.769593	0.663698	1.03858	0.563028	0.514428	0.68711	0.741283	0.868751	0.888481	0.619858	0.546885
	31.5	0.560081	0.844836	0.603831	0.766893	0.547634	0.637176	0.486828	0.461748	0.981317	0.869874	0.731207	0.782706	0.641324	0.992145	0.606262	0.532584	0.702282	0.742659	0.823941	0.883654	0.599057	0.571357
	32	0.549898	0.7987	0.614947	0.7945	0.538579	0.596968	0.490785	0.455685	0.992779	0.864482	0.706817	0.768195	0.641155	1.00149	0.566151	0.532881	0.699116	0.746949	0.843324	0.864366	0.565865	0.538933
