# Supplementary material for: Tyramine induces dynamic RNP granule remodeling and translation activation in the Drosophila brain
Source: eLife. 2021 Apr 23;10:e65742. doi: 10.7554/eLife.65742 (PMC8064753; doi:10.7554/eLife.65742)
Supplement: Figure 3—source data 1. [file elife-65742-fig3-data1.xlsx]

## Sheet: D
	D
	number of Imp+ granules
	ctrl	TyrR-/-	ctrl + Tyramine	TyrR-/- + Tyramine
Repl 1	94.7368	82.1053	25.2632	94.7368
	120	82.1053	18.9474	94.7368
	107.368	94.7368	56.8421	94.7368
	69.4737	44.2105	75.7895	94.7368
	120	69.4737	6.31579	50.5263
	126.316	101.053	18.9474	44.2105
	56.8421	126.316	50.5263	50.5263
	63.1579	132.632	75.7895	101.053
	132.632	69.4737	44.2105	56.8421
	132.632	50.5263	63.1579	44.2105
	107.368	88.4211	69.4737
	107.368	82.1053	75.7895
	88.4211	88.4211	37.8947
	75.7895	63.1579	69.4737
	126.316	63.1579	75.7895
	63.1579	94.7368
	88.4211	44.2105
	120
Repl 2	99.0991	117.117	18.018	99.0991
	117.117	72.0721	81.0811	45.045
	81.0811	90.0901	81.0811	90.0901
	99.0991	126.126	36.036	108.108
	117.117	126.126	90.0901	90.0901
	117.117	144.144	63.0631	72.0721
	108.108	36.036	45.045	54.0541
	81.0811	81.0811	27.027	108.108
	63.0631	90.0901	27.027	63.0631
	117.117	117.117	45.045	81.0811
		108.108	54.0541	81.0811
		81.0811	45.045	90.0901
		135.135	18.018	162.162
		162.162	54.0541	81.0811
		63.0631	63.0631
		63.0631	54.0541
			90.0901
			72.0721
			54.0541
			54.0541
Repl 3	93.9759	93.9759	43.3735	130.12
	86.747	79.5181	21.6867	137.349
	101.205	7.22892	93.9759	72.2892
	101.205	0	108.434	72.2892
	115.663	28.9157	50.6024	137.349
	72.2892	14.4578	79.5181	115.663
	79.5181	93.9759	0	86.747
	79.5181	86.747	28.9157	101.205
	115.663	21.6867	57.8313	108.434
	86.747	86.747	36.1446	122.892
	151.807	122.892	7.22892	57.8313
	137.349	86.747	21.6867	79.5181
	86.747	122.892	21.6867
	93.9759	187.952	72.2892
	93.9759	79.5181	108.434
	101.205	86.747	79.5181
	130.12
	72.2892

## Sheet: E
	E
	Me31B partition coefficient					Mean
	ctrl	TyrR-/-	ctrl + Tyramine	TyrR-/- + Tyramine			ctrl	TyrR-/-	ctrl + Tyramine	TyrR-/- + Tyramine
Repl 1	2.61692	3.24	1.73771	2.7811		Repl 1	3.86	3.993	3.376	3.852
	3.21393	2.4	2.37705	2.84577		Repl 2	6.027	5.34	5.619	4.602
	2.97512	2.10222	2.19672	2.60199		Repl 3	3.677	3.393	3.393	3.708
	2.95522	3.19111	2	4.18905
	2.80597	4.38222	3.08197	3.26866
	3.24378	3.04444	2.08197	3.34328
	3.54726	3.02667	2.42623	3.94527
	3.39801	2.46222	2.29508	7.82587
	3.75124	2.27111	2.88525	4.34826
	3.32836	2.80444	2.11475	3.60697
	5.0597	2.26667	2.68852	3.12935
	3.66169	2.37333	2.16393	3.41294
	5.22886	2.32889	2.62295	3.34328
	3.55721	2.56889	2.54098	2.98508
	3.66169	2.21333	2.31148	2.71144
	5.00995	2.67111	2.70492	4.35323
	4.93532	3.10667	2.72131	5.22886
	3.95025	2.85778	2	4.77612
	4.06965	3.48	2.52459	2.36318
	3.12935	3.81778	1.95082	4.43284
	3.68159	3.39556	2.47541	3.66667
	4.94527	2.17333	2.59016	3.01492
	3.10945	2.39556	3.45902	5.74627
	3.26866	2.08444	2.63934	3.70647
	3.19901	3.39111	3.16393	3.92537
	5.9005	2.48444	2	3.14428
	7.10945		2.47541	2.49254
	4.23383	2.1	2.44262	3.67164
	3.0199	2.91579	2	2.87562
	2.9801	3.12105		3.27363
	3.64179	2.43158	1.95522	3.68159
	3.32836	3.97895	2.8209	4.48259
	6.1592	2.62105	2	4.60199
	4.38309	2.05263	1.8806	3.8209
	4.40796	2.61579	2.40299	3.26368
	3.00995	2.48421	2.07463	2.84577
	3.04975	2.97368	1.95522	5.12935
	3.75124	2.58947	1.95522	3.35323
	3.86567	4.2579	3.13433	5.51244
	4.12935	3.16842	2.26866	4.32836
	4.00497	3.51053	2.41791	4.8408
	5.95025	2.53684	2.08955
	4.00995	3.80526	2.04478	5.07655
	2.50746	3.67368	1.9403	5.7799
	4.33333	2.66316	2.73134	6
	2.8806	2.39474	2.32836	3.21531
	3.64179	3.46316	1.95522	7.80861
	3.13433	2.98947	2.46269	4.22966
	2.87562	2.54737	2.56716	2.57895
	3.78607	2.61579	2.02985	4.01435
	2.46766		2.34328	2.82297
	3.46766	2.93333	2.14925	3.00957
	3.9403	3.98025	1.97015	3.30622
		3.41728	2.74627	4.64593
	2.59794	4.18025	3.28358	3.86124
	4.14949	4.21481	2.01492	3.58852
	4.15464	3.54074	2.43284	4.45933
	2.86598	6.08148	3.8209	3.27273
	4.60309	4.22963		3.86603
	4.48969	3.60494	6.84884	4.57416
	3.12371	6.00988	2.59302	3.90909
	2.84021	3.9679	2.98837	3.90909
	2.62887	3.32346	3.6686	3.00957
	2.97423	4.63704	3.26163	3.58373
	3.50515	3.88642	4.80814	4.37321
	3.92268	4.81728	2.94767	5.25359
	5.39691	6.17037	7.33139	3.37321
	3.59278	4.74815	2.7093	3.4689
	4.13917	5.16543	4.58139	7.86603
	4.08247	3.00247	4.11046	6.54067
	5.28866	5.09383	4.44186	2.79904
	4.37629	5.10864	2.91279	3.74163
	3.23711	4.65926	2.81977	4.57895
	2.54639	3.87901	2.8314	3.88517
	4.29381	3.57284	5.61628	6.16268
	3.20619	3.61975	3.2093	2.93301
	4.65464	3.38765	3.98256	5.05263
	3.17526	2.85926	4.4593	4.34928
	4.62887	5.04444	2.9593	3.89474
	3.06701	3.77037	4.72674	6.26316
	3.16495	4.11852	3.47674	3.1866
	7.89691	8.1037	3.34884	4.19139
	3.19588	5.71605	4.18605	2.73206
	4.18041	3.68148	4.99419	3.70335
	3.27835	9.63457	2.75581	6.53589
	4.31959	4.12099	3.66279	4.11962
	3.12371	4.67407	2.73256	3.38278
	4.64949	5.14321	3.58721	3.77034
	3.2268	7.56543	5.7907
	3.85567		5.35465	3.19737
	3.54639	2.78101	2.73256	5.45
	4.57732	3.07171	6.10465	3.46842
	3.15464	4.21124	2.4593	4.44737
	3.65464	4.31977	4.32558	3.7
	2.69072	3.23643	5.63954	3.43158
	3.67526	3.98256	2.77326	6.98158
	2.81443	3.18023	2.97674	6.72632
	3.39691	2.78488	4.52326	3.68158
	2.91753	4.29264	4.31395	5.08684
	3.1701	2.87597	3.0407	6.15263
	4.40206	3.48643	2.75581	3.84737
		3.00775	3.00581	3.89737
	3.11511	4.38954	4.55233	4.1921
	3.97842	3.76163	6.86046	5.73947
	5.38129	4.72868	2.97093	6.25
	4.48921	3.68217	2.91279	4.1921
	5.33094	2.8469		3.36053
	5.68345	3.4186	3.60825	5.70263
	5.46763	4.77326	3.79897	3.12895
	6.6259	3.63566	2.47938	4.18158
	3.43166	3.12597	3.02577	2.90263
	3	3.24806	3.37113	3.65263
	4.72662	3.87209	4.5	3.57632
	3.23022	4.34108	4.47423	2.88158
	5.35252	3.11628	3.24227	3.01842
	3.51799	6.27326	3.81443	3.51053
	4.55396	2.89535	3.01031	3.36316
	3.46043	2.74225	4.29381	6.41053
	6.02158	4.7907	2.23196	3.2
	8.2446	2.58915	2.65979	4.32632
	4.10072	4.35659	4.02062	7.2579
	6.14389	2.87791	2.90206	2.90263
	3.93525	2.81783	5.91753	5.39737
	3.05036	5.37791	4.87629	3.55789
	3.59712	3.14535	5.08763	3.56842
	4.7482	4.18411	3.35052	3.68947
	2.95683	2.98256	5.27835	4.48158
	5.57554	5.19186	4.62887	3.76316
	3.39568	4.98062	3.74742	4.23158
	4.48921	3.0407	2.47938	2.97632
	3.89209	4.93023	4.48454	4.02895
	10.1799	2.67636	3.38144	5.64474
	3.59712	4.49419	2.52062	4.75263
	3	2.61434	3.99485
	5.02158	4.18217	6.43814	4.27838
	4.38849	2.7907	3.06701	4.85135
	3.66906	2.92829	3.50515	4.06487
	4.20863		4.03608	4.02432
	3.43885	5.40438	4.75258	5.15405
	3.46043	4.37649	3.39691	6.32703
	7.35971	3.48207	3.0567	2.65405
	6.09352	3.44223	4.91753	4.23243
	3.28777	4.35458	3.93814	3.41081
	6.01439	3.68725	3.31443	3.07027
	3.86331	4.68327	2.70619	2.76216
	6.26619	4.03187	3.52577	4.07568
	4.1295	3.35657	2.46907	3.0973
	4.23022	2.86056	2.40722	2.82703
	3.14389	5.16534	3.29381	3.62432
	5.88489	3.60956	2.58763	2.93513
	3.65468	3.81474		4.21081
	4.79856	2.51594	3.39423	4.13243
	4.89928	4.46016	2.78846	3.2027
	8.76259	3.31076	2	4.85135
	3.39568	6.87649	2.375	3.3054
	6.1295	6.13944	1.83654	3.44054
	3.60432	5.6992	1.91346	2.66216
	3.52518	3.55578	2.80769	4.38919
	3.20144	4.4761	1.93269	3.32162
	3.82734	3.06374	2.5	3.27838
	4.68345	5.07171	2.30769	6.51351
		3.55578	2.125	4.05405
	4.15972	3.06175	2.74038	5.23243
	5.90278	3.04183	2.18269	3.71351
	3.90278	3.35458	1.75961	4.77027
	4.00694	3.40638	2.625	4.15946
	2.97222	7.17928	2.09615	4.21622
	5.01389	5.30279	2.91346	3.74595
	3.47917	5.13347	2.29808	3.84054
	3.5	3.03785	1.89423	3.55946
	5.39583	3.74303	2.16346	3.93243
	3.51389	3.03387	2.31731	4.0973
	2.86806	3.64741	2.49038	2.68378
	3.8125	2.86653	2.18269	3.31622
	5.5	4.79283	2.19231	2.98649
	5.1875	5.0259		2.88378
	4.20139	2.66733	2.1453	3.02973
	3.21528	3.78486	2.4359	3.31892
	3.45139	3.53187	2.37607	3.48378
	5.30556	4.50996	2.42735	4.58919
	4.55556	5.37052	2.35897	4.21892
	3.72917	3.16335	2.38462	5.28108
	4.14583	8.18327	3.55556	4.06216
	3.72917	3.11355	2.1282	2.93784
	3.36806	4.30478	1.83761	4.18649
	4.20139		2.37607	3.22432
	6.52083	8.06769	2.78633	3.42973
	4.3125	3.36463	2.16239	3.49459
	5.73611	3.95196	2.07692	2.6973
	6.00694	4.39956	3.05128	6.11892
	3.23611	4.3821	1.82051	2.57027
	3.81944	5.25983	3.39316	3.02432
	5.42361	3.96725	1.96581	4.36486
	3.40278	4.41048	2.59829	5.02973
	3.5	4.20961	1.8547	3.4973
	4.23611	7.82533	2.44444
	3.34028	4.17249	2.33333	5.17647
	3.40972	4.28603	2.06838	2.50588
	4.625	3.89083	2.21367	2.94823
	6.21528	5.18122	1.89744	2.41412
	2.83333	6.20524	2.32479	2.63059
	5.09722	3.20961	2.30769	2.68471
	3.125	5.71179	2.01709	2.46823
	3.13889	5.0917		4.22118
	2.96528	3.79039	4.68805	3.69882
	4.80556	4.00218	4.83674	2.68941
	3.48611	8.17031	4.61224	2.66118
	2.75694	4.78821	4.0379	2.36235
	4.77083	7.31878	6.64723	2.72941
	3.20833	3.51965	3.51604	2.67294
	3.8125	7.6179	4.10496	4.28
	4.27083	4.84716	2.72595	2.56471
	4.63889	9.34934	4.86589	2.57647
	4.375	8.21179	7.22741	3.62118
	3.59722	4.29039	8.65889	3.00235
	3.02778	4.69214	3.42566	3.71765
	5.13889	7.17904	2.95335	3.56
	3.48611	5.66594	3.34985	3.84235
	4	3.18996	5.4723	2.98588
	5.45139	3.69214	4.82799	2.90118
	6.93056	4.38428	5.51603	4.44
	3.6875	4.94541	5.19534	3.00235
	6.73611	5.12664	3.33819	4.12
	3.15972	5.86463	7.40816	3.70118
	3.51389	4.16157	4.14869	2.92235
	4.90972	6.16376	3.80758	4.87059
	5.52778	4.51528	4.80175	2.73882
	6.88194	4.45197	3.51312	3.52235
	3.27083	6.21179	3.86297	2.34353
	5.92361	3.9869	4.76093	4.36941
	4.92361	3.68341	2.70845	3.52471
	3.50694	4.35808	4.92128	3.92235
	3.3125	7.06332	4.57434	2.73412
	6.1875		4.71137	5.45647
		4.57774	6.1691	4.64471
	2.62356	3.61484	5.21283	2.88471
	3.56034	5.13428	2.94169	3.13882
	3.03448	4.9417	4.18659	2.48706
	2.89655	5.07421	3.65306	3.07294
	3.45402	3.25972	3.44023	2.56941
	2.95115	3.4894	4.99125	2.81412
	2.88506	4.97173	4.62099	4.75529
	4.76437	3.87986	2.9242	3.54588
	4.78161	2.77209	3.21866	2.95765
	2.60058	3.11837	3.68805	2.44
	2.64368	4.29152	2.65889	3.66118
	2.52299	4.79682	5.39942	4.69647
	2.43678	2.88869	6.80175	3.92941
	4.47989	2.71908	4.00875	2.76941
	2.42529	5.75265	4.20408
	4.78161	4.15194		3.74227
	3.6092	3.04594	3.8187	3.66323
	4.25862	4.16961	3.75921	4.52921
	4.76437	3.42579	2.71671	3.79381
	3.3908	3.84982	3.16431	3.43299
	4.97414	5.16431	2.44193	4.06186
	2.95977	3.91343	5.20113	3.31271
	3.37644	3.32332	2.76204	2.90378
	3.12644	5.96113	5.19547	3.42955
	2.9454	3.33569	2.51841	2.73883
	4.46839	3.14664	2.1898	4.59794
	3.62931	4	2.6204	4.72165
	3.55747	2.70671	3.00283	3.23711
	3.20115	6.16961	4.56091	2.94845
	2.92241	4.62544	3.6204	4.73883
	3.02586	3.78975	2.94618	3.33677
	3.66667	4.39929	3.55241	2.87973
	3.92816	3.87809	3.43059	2.57732
	2.74713	6.19788	4.50992	4.00687
	3.54598	2.88339	2.57224	3.02062
	2.52874	4.66078	3.29745	5.28522
	3.72701	4.98233	2.42776	3.61168
	3.38506	3.5583	2.9915	3.19588
	3.07471	3.84806	4.81586	4.30928
	3.38793	3.23852	2.8187	2.83849
	3.48851	7.76502	3.37677	6.83505
	5.38218	4.18728	3.44193	3.1134
	4.00287	2.71555	2.87819	4.54639
	3.14942		3.05666	3.94502
	2.83621	4.15845	2.35411	2.76976
	3.43391	5.02289	2.84986	5.87285
	5.20977	3.30282	5.26346	4.82131
	2.68391	3.54577	2.63739	2.7354
	4.73276	4.17253	4.46176	3.74227
		3.58275	3.07365	3.33677
	3.8	2.90493	2.44759	2.7457
	2.75102	3.35739	2.68838	3.89691
	2.47347	3.54401	2.43909	2.89691
	2.79592	2.73591	2.64589	3.06186
	4.68571	3.79577	4.30028	6.54296
	2.41224	4.79753	2.80736	3.55327
	3.48163	2.90317	4.11048	4.4055
	4.17959	3.24296	3.90652	8.65636
	4.38776	3.77817	3.34278	8.93471
	2.70204	5.32923	3.71955	8.02749
	3.02041	2.84331	4.50142	2.87629
	4.34694	3.51409	2.69405	2.9244
	4.79184	3.15317	2.90368	4.28179
	3.31837	5.97887	2.91501	4.54296
	2.57551	2.97007	3.983	2.50172
	3.13878	2.82923	4.23796	2.55327
	3.44898	2.84859	2.27196	5.43643
	2.93061	3.05106		2.61512
	5.52245	4.10916	2.88973
	3.2898	2.61796	2.8251	4.31358
	3.47347	3.76409	3.01141	3.26173
	2.89796	2.82042	2.92776	4.71852
	3.65714	4.61972	3.14068	3.58765
	4.12245	2.96479	2.92776	3.1679
	2.7102	2.60915	2.36882	2.86667
	4.72653	4.68486	4.29658	3.67407
	3.06939	3.19014	2.81749	3.24198
	3.38367	6.68486	3.41825	3.36049
	3.14694	3.5757	3.1711	3.05926
	3.36327	3.90669	2.73384	5.41975
	3.77959	2.84155	2.5019	3.68148
	4.94694	2.59331	2.38023	4.09877
	3.0449	4.15141	2.59316	4.02469
	4.46939	3.58979	3.43346	4.37531
	4.12653	6.74824	2.1597	6.29383
	3.65306	2.75176	4.05703	6.66667
	5	3.61444	2.84411	2.66914
	3.34694	3.10211	2.61977	2.88148
	3.52245	4.30986	3.13308	2.82469
	2.83265	4.88732	2.70722	6.03457
	2.7551	3.16725	2.55893	6.45432
	3.72653	2.89261	2.89734	4.18025
	2.6449	3.21303	2.71103	3.55556
	2.49388	5.93662	3.84791	4.72839
	5.3551	4.60387	2.98479	2.91605
	4.45306	4.41373	3.96958	3.41728
	2.52653	2.49648	3.89354	2.92099
	3.03265	3.31338	4.42966	2.88889
	3.22857	3.72535	2.62357	6.20988
		3.17958	5.79087	3.20494
	2.8884	3.67782	4.72243	4.73333
	3.29103	3.36972	2.57414	4.85679
	2.94092		2.09886	4.98765
	3.11597	3.7012	2.92776	5.25432
	2.61707	5.37108	3.20152	2.98518
	3.61926	2.90602	4.53992	5.51852
	5.62363	3.04337	3.6578	3.01728
	2.8884	5.46024	2.82129	2.81728
	3.06565	2.75904	3.51711	3.17284
	6.76368	3.65542	2.19772	4.56049
	2.79869	8.36145	4.13308	3.89383
	3.74179	4.10361		6.83457
	5.74617	3.80241	5.2852	2.65679
	2.95624	2.9253	2.53791	5.26914
	6.64551	3.61446	2.88448	4.4642
	3.57112	2.95181	3.77256	2.99259
	2.75273	4.91807	2.13357	4.34321
	7.01969	3.67952	2.44043	3.13827
	3.54048	3.89879	3.09025	2.58272
	2.98906	3.4506	3.25632
	4.04157	4.13494	3.44404	5.70619
	6.39387	3.11807	3.02166	2.94072
	2.7768	4.0241	2.66426	3.60567
	3.70897	2.4241	4.787	3.46392
	3.65427	3.12048	2.90975	3.36598
	2.6849	5.44578	2.90614	4.26289
	3.04376	2.80482	3.4657	3.15979
	3.65208	2.7012	2.88448	3.26031
	3.66958	3.67229	2.40433	2.67526
	5.23632	5.09879	2.41877	3.58763
	5.34354	2.96868	3.01805	5.30928
	6.82713	4.40241	3.27798	2.93557
	9.22538	3.66024	3.39711	4.42268
	4.73742	5.96868	3.09386	3.52577
		3	2.49819	3.15722
	2.57784	3.85542	2.31047	3.23711
	4.38323	2.52048	4.71841	3.03608
	3.9012	2.50361	2.72924	3.64691
	4.01497	6.55422	2.62455	2.83763
	6.23653	3.81205	3.74729	4.57474
	3.56886	2.75904	2.62094	3.65464
	2.58683	6.69639	2.73646	4.31959
	3.23653	2.60241	2.90614	3.3299
	3.30539	5.64337	2.8917	5.67526
	4.27844	5.79277	3.0361	4.21907
	3.68563	3.21687	2.83033	4.2732
	2.90419	3.26988	3.88448	2.61856
	3.09281	2.86506	4.33574	3.2165
	3.7006	2.58072	2.70036	2.58763
	4.58383	2.61205	3.11552	3.06186
	2.91617	2.90843	2.62455	5.32217
	2.6976	4.25542	2.99639	3.59278
	2.51497	3.41928	3.72202	4.01031
	2.89521	2.95663		5.96907
	4.65269	4.43374	3.09402	3.73969
	3.82934	3.05301	2.65812	3.53608
	2.51796	3	3.40171	3.01031
	2.73653	3.20964	2.59259	2.70876
	3.05988	2.96868	2.73219	2.7165
	4.81138	4.84096	2.85185	4.58247
	3.93713	3.49879	6.50997	6.81443
	6.0509		3.4131	2.80412
	5.25449	6.49476	3.93162	3.90979
	3.73054	2.81675	2.69516	2.48969
	3.96407	3.82461	3.35897	3.73196
	3.71557	8.01309	4.91168	4.68299
	3.80539	2.93194	4.51282	3.84021
	3.91317	5.29581	3.39316	2.92268
	2.78742	4.8822	4.74074	4.27835
	3.98204	2.78796	3.75784
	4.49701	4.9555	4.05413	3.17692
	5.16467	3.9267	3.19943	3.69231
	3.11377	4.55236	3.20798	2.48846
	2.67066	3.75655	3.58974	2.88462
	3.0479	6.14398	2.93162	2.79615
		5.60209	3.62963	2.79615
	3.57876	4.42408	3.78917	2.63077
	2.91941	3.4712	6.64388	3.35385
	2.31135	3.49215	3.03989	2.80385
	2.38095	4.91885	6.15385	2.88462
	2.9011	2.49215	2.90883	4.27692
	3.27473	6.16492	3.39886	4.39615
	2.4652	3.29058	2.8661	5.00769
	3.51282	3.10209	5.00855	4.15769
	3.05861	3.78796	4.87179	3.03462
	2.35531	5.25393	3.31054	2.79231
	3.84982	3.14136	2.79202	3.64231
	3.05128	4.03927	4.44444	4.41923
	2.98169	2.99476	3.41595	3.31539
	2.31135	3.69895	7.23647	3.36538
	2.53114	3.29843	5.74359	3.06154
	5.70696	2.68325	3.50712	3.36923
	2.39927	3.44503	4.45584	2.87692
	3.95971	3.44241	2.45014	3.56923
	4.26007	4.31414	2.81766	3.42308
	2.57876	3.411	3.23077	3.15385
	2.95238	3.08377	4.19373	4.8
	3.22344	3.48429	4.78063	3.3
	3.79121	4.13089	4.96011	4.11923
	2.68498	3.2644	3.39886	3.32692
	2.96337	3.71204	2.85755	2.41923
	3.3663	3.68848	4.39601	2.84615
	2.69597	3.411	2.78348	6.31154
	3.4652	4.04188	3.76353	2.44231
	2.95971	5.99215		2.58461
	3.93407	2.60733	3.09921	2.60385
	3.43223	3.79581	4.62698	4.22692
	2.89744	3.74084	2.86111	3
	2.9707	2.72513	5.96032	2.52692
	3	4.65183	2.76984	4.74615
	3.47985	3.86126	7.16667	2.43077
	3.75824	3.36126	3.97619	2.61923
	2.49084	2.79581	3.40079	3.53077
	2.59707	3.32461	3.54365	4.93077
	3.42491	6.01832	5.78175	3.74231
	2.65202	2.82199	5.30556	2.65769
	2.55311	3.58115	2.68651	4.20769
	3.15385	2.49738	3.10714	2.86923
	2.57876	4.75131	3.59127	2.37308
	2.61172	6.92147	3.22222	4.92308
	2.68498	4.34817	2.99206	2.70769
	2.10256	6.01309	5.82143
	2.35897	4.55759	3.33333	4.27523
		3.21728	3.53175	4.45413
	2.78879	2.77487	3.79762	2.94954
	3.12931		5.53571	2.44495
	4.02586		3.5754	3.38073
	2.47414		2.94841	3.11927
	2.60345		2.75794	2.45413
	3.42672		2.36111	3.68349
	3.18103		3.61508	2.79817
	2.43966		3.3373	3.56881
	2.44828		2.76587	2.86239
	3.13793		2.68651	2.55046
	2.94397		2.95635	3.93119
	2.22845		3.30556	3.03211
	3.84483		4.21429	4.59174
	5.85776		2.80952	3.41743
	2.38362		3.45238	5.06422
	5.22845		2.79365	3.50917
	3.72845		3.85714	3.34862
	7.125		2.98016	3.37615
	2.68966		4.02778	3.48624
	2.15948		3.12698	6.01376
	4.7069		5.03175	4.10092
	3.84914		2.89683	3.44037
	2.34483		3.76984	3.27523
	2.71552		3.71032	3.92661
	2.24138		3.57143	6.10092
	3.47845		5.98413	2.97706
	3.10345		4.84127	3.13303
	3.10776		3.98413	5.06881
	2.36638			2.94037
	2.51724		2.28326	2.68349
	2.70259		3.74249	6.8578
	2.26293		2.58369	5
	2.49569		2.54936	5.34404
	2.8319		3.61373	2.62844
	4.13362		2.54077
	3.71983		2.8412
	2.59483		3.16738
	2.78448		6.30901
	5.05603		2.30472
	3.31466		2.81116
	3.91379		4.1073
	2.28017		4.87125
	2.9569		3.11159
	2.72414		2.33047
	2.39224		2.98283
	2.30603		2.69099
			2.81116
	5.66887		2.67811
	4.23841		2.62232
	3.5		4.18884
	3.28477		3.13305
	2.46027		2.58798
	3.19536		2.70386
	2.99669		3.30043
	4.17218		3.64807
	2.85431		2.20601
	2.54967		2.5794
	4.24503		4.92275
	5.59934		2.77253
	3.78146		2.75107
	4.0298		3.3691
	2.78477		3.09013
	5.40728		2.48927
	4.11921		2.39485
	2.79801		2.2103
	2.5596		3.25322
	3.07947		2.36481
	4.11258		2.15451
	3.25166		2.97854
	3.39735		2.54077
	2.82782		3.17167
	3.33444		3.07725
	2.60927		3.72961
	2.66225		2.65665
	4.67881		3.34335
	2.98676		2.90987
	2.91391		2.31331
	2.92715		3.24893
	2.69868		5.70815
	2.7351		3.83262
	2.54636		3.0515
	3.80464		3.23605
	2.99007
	3.03973		4.925
	2.81788		2.94
	3.45695		3.56
	5.41722		2.885
	3.89735		5.35
	3.90066		4.16
	2.56623		3.73
	4.27815		2.92
	3.50331		3.945
	2.43377		4.765
	2.67881		2.855
	3.92053		2.455
	2.6755		3.975
			3.37
	3.00362		2.94
	5.11956		3.455
	3.88043		2.94
	2.3442		3.83
	3.56522		2.61
	3.03986		2.62
	2.97464		3.2
	4.51812		2.45
	2.92754		2.825
	5.4058		3.34
	2.35507		2.675
	3.4058		3.015
	3.46377		4.735
	5.86594		3.92
	4.41304		6.345
	3.05797		3.635
	2.42391		3.27
	2.55072		3.93
	4.94928		3.265
	3.0471		3.55
	3.61232		2.635
	2.46014		7.04
	2.88768		3.48
	5.69203		2.53
	4		3.695
	3.17754		3.84
	2.92029		3.435
	3.47101		3.135
	4.05072
	2.6087
	2.62319
	3.31522
	3.80435
	3.71739
	2.47464
	4.82609
	4.21014
	2.81522
	2.74275
	4.77174
	3.22101
	4.19203
	3.43116
	2.79348
	2.33696
	2.50725
	2.67029
	3.65649
	2.69466
	3.0458
	3.39695
	4.36641
	2.56488
	3.23664
	2.85496
	3.29771
	4.69466
	5.82443
	3.46565
	3.67176
	3.35114
	3.19084
	3.12214
	5.16031
	2.72519
	6.32061
	4.15267
	2.96947
	3.00763
	3.41221
	3.54198
	2.54198
	3.99237
	2.74046
	4.0458
	4.77099
	3.34351
	2.54962
	2.86259
	3.12214
	2.89313
	4.16794
	4.38931
	3.64886
	3.84733
	5.44275
	4.74809
	3.54198
	2.77099
	3.27481
	2.54198
	3.25191
	5.34153
	2.62568
	3.78688
	2.93716
	4.68033
	4.8306
	2.73771
	3.98634
	3.8388
	3.34426
	3.60109
	5.75137
	3.06557
	2.63115
	4.31967
	5.54645
	4.59836
	3.87432
	4.44262
	4.29235
	3.53825
	3.37705
	2.61202
	4.1612
	3.82514
	3.61202
	3.82787
	6.43169
	4.22951
	3.61475
	3.84153
	7.17213
	7.11202
	2.91803
	3.32787
	3.47541
	4.02459
	2.80874
	3.0929
	4.63934
	4.34426
	4.63934
	3.09563
	3.91803
	3.23771
	3.33607
	4.10656
	3.64208
	4.57377
	3.35519
	3.90984
	6.77322
	3.29508
	3.41803
	3.22404
	3.61475
	5.94262
	2.87978
	5.27843
	3.69412
	4.61569
	3.58431
	3.87843
	3.10588
	3.87451
	2.71765
	3.05098
	3.45882
	4.0902
	4.80392
	3.25098
	2.62353
	2.81961
	4.43922
	2.93333
	2.80392
	3.10588
	3.23137
	4.61961
	3.61961
	2.76078
	5.29804
	3.90196
	6.35294
	4.06274
	2.84314
	4.10196
	6.07059
	5.8902
	4.27843
	2.81569
	2.62353
	3.12941
	4.28235
	3.03529
	5.96078
	3.41176
	2.46667
	3.03922
	6.07451
	4.38823
	2.7451
	5.57488
	3.09179
	4.34783
	4.98068
	4.0628
	3.00483
	4.01932
	2.9372
	3.29952
	3.17874
	5.81159
	2.57971
	5.51208
	3.09179
	3.21739
	4.25604
	3.34783
	3.51208
	3.27053
	3.00966
	5.93237
	6.88889
	2.91304
	3.18357
	4.88889
	3.29952
	6.83575
	2.80676
	3.08696
	6.69565
	3.57005
	4.19324
	4.37681
	3.25121
	6.05314
	7.01449
	2.63285
	4.76328
	4.19324
	6.75845
	2.89855
	4.03382
	3.48309
	2.76329
	3.45989
	4.2754
	6.00535
	6.59091
	3.37968
	5.38503
	7.07754
	5.71925
	3.86364
	3.43048
	3.31283
	3.01337
	4.86096
	6.96257
	3.07487
	3.81283
	3.79947
	4.79412
	4.05882
	6.01337
	4.69786
	4.31551
	4.39037
	4.68449
	3.82888
	3.3877
	5.09358
	3.10428
	6.91711
	2.91979
	3.25401
	3.30749
	2.87701
	4.92513
	5.72727
	4.41444
	2.7246
	3.95187
	3.40107
	4.29144
	5.23529
	3.36364
	3.2139
	4.2139
	4.03476
	3.6738
	3.59358
	4.25401
	3.66578
	5.48128
	4.64171
	2.81016
	7.58289
	5.10695
	4.3064
	4.99663
	5.52189
	3.38384
	8.49832
	3.85185
	3.16162
	3.30303
	4.3468
	3.58249
	5.0202
	2.80135
	2.78114
	2.73401
	3.98317
	3.83838
	3.31987
	3.56566
	5.28283
	5.09091
	5.29966
	2.88552
	4.68013
	5.0404
	4.83502
	4.41414
	5.56566
	3.83502
	5.32997
	3.76768
	4.6229
	4.75758
	5.6633
	3.6532
	5.35017
	7.04377
	4.55892
	4.85522
	3.83838
	2.55219
	3.35353
	5.11784
	3.63973
	3.7037
	5.34007
	4.07744
	4.7138
	3.04377
	3.12795
	2.87205
	5.68687
	6.03367
	4.51515
	4.0202

## Sheet: F
	F
	ΔF/F0
	time (min)	control (+ Tyramine)																					TyrRKO + Tyramine
	0	0.0432655	0.036559	0.0164326	0.00550537	0.000249404	0.0186724	0.0129722		0.0218458	0.0915452	0.0045531	0.0352502	0.0209127	0.0509575		-0.0145755	0.0422511	-0.0144893	0.0308404	0.00904693		-0.0740765	-0.0563805	-0.117826	0.00782185	-0.0575658	-0.0206562	0.00807608	0.0144255	-0.00312758	0.0101059	0.00773537	-0.0200643	-0.00500927
	0.5	0.00349701	0.0202077	0.00450963	-0.00916705	0.00501579	-0.0115923	-0.00377698		-0.00481136	0.00353281	-0.0161065	0.00244169	-0.00474228	-0.0013535		-0.00820938	0.0108332	-0.0011424	-0.00313614	-0.00570408		0.0491591	0.0113669	0.016399	-0.0490629	-0.00198077	-0.00234316	-0.000334309	0.00402985	-0.00373448	0.00563753	-0.0368056	-0.00783855	-0.0308445
	1	-0.0502536	-0.0581341	-0.00819764	-0.00335975	-0.00697264	-0.0134752	0.00829562		-0.0191676	-0.0259317	0.00714143	-0.0188039	0.0025655	-0.0236487		0.00795092	-0.0113139	0.00257944	-0.0145366	0.00504966		0.0284536	-0.00378977	0.0484701	-0.00258507	0.0446316	0.0231123	-0.00299899	-0.00680221	0.00753653	-0.0030907	0.019842	0.0184849	0.0114779
	1.5	0.00349113	0.00136735	-0.0127446	0.00702143	0.00170746	0.00639507	-0.0174908		0.00213319	-0.0691463	0.00441192	-0.018888	-0.0187359	-0.0259553		0.014834	-0.0417704	0.0130523	-0.0131677	-0.00839251		-0.00353622	0.0488033	0.0529565	0.0438261	0.0149149	-0.000112983	-0.00474278	-0.0116531	-0.000674476	-0.0126527	0.00922825	0.00941796	0.0243758
	2	0.0105101	0.00893345	-0.00489244	0.0208202	-0.006606	-0.021979	0.0454405		0.0327453	-0.044832	0.00676494	0.404395	-0.0171811	-0.0378338		0.266856	0.0999708	0.0274123	-0.0364794	-0.0146537		-0.0142256	0.0473964	0.0730761	0.0489447	0.021665	0.0187207	-0.00471339	-0.0199674	-0.00754928	-0.0185953	0.00427925	0.00561568	0.0416519
	2.5	0.430148	0.476432	-0.0162832	0.00995592	-0.00895082	0.0069921	0.107472		0.0436448	-0.0843819	-0.0174241	0.505711	-0.0401928	-0.0432772		0.863712	0.372466	0.0336361	-0.049596	0.0013		0.0327604	0.00808585	0.059	0.0320865	0.0441789	0.0240555	-0.0123939	-0.0268438	-0.0138121	-0.0162304	0.105407	0.00140392	0.181596
	3	0.431309	0.876519	-0.0329399	-0.00777433	-0.00742456	-0.0158021	0.0778126		0.143858	-0.0371995	-0.0101298	0.492128	-0.017803	-0.0478538		0.990138	0.486772	0.0397358	-0.0728259	0.0137163		-0.0214038	0.00665023	0.0541357	0.0318503	-0.032747	0.00999651	-0.0350437	-0.019559	-0.0230074	-0.0263647	0.167964	0.0565955	0.272354
	3.5	0.422974	1.01819	-0.143141	0.0367312	0.00701101	-0.0317993	-0.000782865		0.169861	-0.0511842	0.0193771	0.411888	0.0699681	-0.0590124		0.874268	0.558055	0.0298315	-0.104106	0.237175		0.0329521	0.0320336	0.0535377	0.0493506	0.0523489	-0.0192906	-0.0476617	-0.0339551	-0.0500578	-0.0326446	0.199254	0.164697	0.310772
	4	0.327382	0.801745	-0.0981289	0.0801266	0.02733	-0.00487189	-0.065122		0.219345	-0.0446072	0.0715202	0.353625	0.145378	-0.06771		0.714556	0.579103	0.0601542	-0.130114	0.405945		0.134128	0.0633369	0.05051	0.114042	0.07299	0.0255292	-0.0551121	-0.0554122	-0.0570142	-0.044329	0.211728	0.238023	0.351556
	4.5	0.2133	0.559462	-0.0816309	0.091032	0.0324971	-0.0124419	-0.121557		0.301341	-0.0385775	0.150394	0.286857	0.219855	-0.0728816		0.577152	0.599087	0.12081	-0.149033	0.566543		0.173494	0.0981536	0.0529904	0.150163	0.136087	0.0974844	-0.0595009	-0.0622661	-0.078322	-0.0383409	0.223937	0.270781	0.349505
	5	0.174499	0.396314	-0.0168808	0.0775673	0.0822243	-0.00911231	-0.0563182		0.382869	-0.0286778	0.20569	0.240633	0.299075	-0.0730433		0.45712	0.574158	0.165896	-0.154917	0.708181		0.234999	0.0996276	0.041659	0.168445	0.143866	0.224222	-0.0600789	-0.0637265	-0.0849062	-0.0522386	0.220992	0.292629	0.344969
	5.5	0.0766851	0.284461	-0.0119603	0.102904	0.0624682	0.00851528	0.00133911		0.461283	-0.0291371	0.223714	0.199265	0.293711	-0.067115		0.378549	0.583498	0.215623	-0.153834	0.829797		0.243095	0.105049	0.00514893	0.163825	0.16747	0.320198	-0.0642278	-0.0795213	-0.081535	-0.0586095	0.211278	0.293946	0.354199
	6	0.0202627	0.192332	0.00581678	0.118845	0.125983	0.0119367	0.0719274		0.527864	-0.0160222	0.223667	0.162751	0.33919	-0.0492275		0.286022	0.563617	0.250681	-0.167155	0.915509		0.226156	0.0977031	0.0135949	0.159429	0.167841	0.387585	-0.06966	-0.0786317	-0.0877316	-0.062407	0.205389	0.2852	0.3116
	6.5	-0.0251198	0.105867	0.0493072	0.0975382	0.137937	0.0139344	0.147707		0.564735	0.00465666	0.222443	0.142825	0.25896	-0.0274392		0.238997	0.510739	0.285242	-0.171344	0.979961		0.215805	0.0563002	0.010308	0.141763	0.109642	0.488218	-0.0639486	-0.0864033	-0.0823409	-0.0612284	0.213364	0.281778	0.30028
	7	-0.0673926	0.0505889	0.0406801	0.136026	0.110669	0.00101418	0.22392		0.601856	0.00308327	0.214208	0.119166	0.332426	0.013052		0.156577	0.481553	0.286969	-0.176737	1.07098		0.187479	0.0335364	0.0147962	0.112206	0.105259	0.508889	-0.0648303	-0.0942532	-0.0958865	-0.0485131	0.193752	0.266511	0.317477
	7.5	-0.178821	-0.0026104	0.0256106	0.122443	0.141101	-0.00588224	0.277526		0.62761	0.00766664	0.179806	0.0970503	0.292622	0.0629682		0.100805	0.471561	0.299261	-0.176329	1.11498		0.180584	0.00484312	0.045461	0.0941343	0.160247	0.578457	-0.0748179	-0.09916	-0.110865	-0.0641011	0.183793	0.245247	0.286278
	8	-0.21632	-0.0795354	0.0566646	0.140615	0.160686	-0.0206854	0.327725		0.656603	0.00735391	0.181312	0.0645505	0.314235	0.102306		0.0547314	0.435713	0.309858	-0.174183	1.10632		0.159627	-0.0230544	0.0671394	0.0760888	0.151624	0.577032	-0.0713891	-0.0961947	-0.116904	-0.0703621	0.17684	0.244604	0.263756
	8.5	-0.202191	-0.0699415	0.0531539	0.12475	0.126375	-0.0238007	0.400813		0.673139	0.0222083	0.157641	0.0480761	0.282749	0.143312		0.00920239	0.397462	0.302218	-0.184971	1.11322		0.0793887	-0.0563086	0.0177866	0.0332738	0.127114	0.578801	-0.0724521	-0.120052	-0.10246	-0.0577037	0.163874	0.231091	0.248097
	9	-0.232386	-0.101641	0.0283556	0.0965463	0.149209	-0.0323657	0.428715		0.694876	0.0174295	0.121451	0.0427437	0.240379	0.184119		-0.0303822	0.360104	0.303128	-0.179475	1.14396		0.149278	-0.10696	0.0951425	-0.0393667	0.102768	0.615721	-0.0717908	-0.108398	-0.11241	-0.0678077	0.154426	0.211699	0.238867
	9.5	-0.270776	-0.139609	0.0643767	0.128903	0.12392	-0.0367056	0.454741		0.708609	-0.000708516	0.102204	0.0340153	0.21729	0.208302		-0.0617098	0.346954	0.305371	-0.194349	1.1112		0.11759	-0.0981501	0.0929755	-0.00675269	0.075439	0.624111	-0.0785406	-0.120623	-0.110697	-0.0714157	0.141542	0.19687	0.230387
	10	-0.318495	-0.180162	0.0637138	0.141997	0.139651	-0.0420559	0.513944		0.729661	0.0107353	0.0938268	0.0037327	0.19078	0.210513		-0.080305	0.313063	0.300853	-0.201561	1.10239		0.11602	-0.112976	0.101865	0.000869768	0.111268	0.607036	-0.0720063	-0.114177	-0.122641	-0.0668034	0.118474	0.167417	0.205577
	10.5	-0.352811	-0.202738	0.0464502	0.140543	0.148118	-0.0566831	0.545574		0.762235	0.0120252	0.0819205	-0.0189442	0.18596	0.206994		-0.0986418	0.286658	0.287176	-0.204707	1.05506		0.095019	-0.130036	0.11256	-0.0100682	0.107954	0.610966	-0.059883	-0.113416	-0.124931	-0.0660416	0.111439	0.152501	0.186723
	11	-0.378806	-0.230444	0.0683541	0.106732	0.0762813	-0.0570352	0.570777		0.797923	0.0175272	0.0481311	-0.0194213	0.143512	0.180336		-0.128364	0.274881	0.281645	-0.203604	1.03401		0.0907378	-0.161603	0.0930992	-0.0267568	0.0926434	0.625055	-0.0812641	-0.123778	-0.125074	-0.0702901	0.101337	0.123282	0.200174
	11.5	-0.40377	-0.265106	0.0446389	0.119375	0.0587506	-0.0764462	0.586524		0.805148	0.015475	0.03406	-0.0479358	0.0930576	0.101674		-0.136526	0.251223	0.282854	-0.203379	0.991068		0.0702255	-0.161825	0.100493	-0.0336645	0.0991053	0.516572	-0.0791529	-0.121205	-0.134891	-0.0713589	0.0886986	0.11866	0.176113
	12	-0.414404	-0.239756	0.0405961	0.089963	0.0700227	-0.0838631	0.59837		0.848715	0.0165011	0.0190948	-0.0543347	0.0687243	-0.00664263		-0.154047	0.202912	0.26685	-0.197659	0.974973		0.0765899	-0.172371	0.0776439	-0.0459553	0.0980146	0.55253	-0.074524	-0.126503	-0.128705	-0.0708965	0.091214	0.125241	0.168659
	12.5	-0.418072	-0.25119	0.00877652	0.103859	0.0729388	-0.0815745	0.614171		0.845351	0.0201072	0.00323541	-0.0701917	0.0338179	-0.0981887		-0.165527	0.153398	0.272268	-0.20056	0.93592		0.0611287	-0.190308	0.0851716	-0.0552053	0.064038	0.523626	-0.0859077	-0.126033	-0.141741	-0.076498	0.073688	0.113279	0.157457
	13	-0.426523	-0.270833	0.0381032	0.081802	0.0529183	-0.0873304	0.630804		0.888171	0.0097873	-0.011118	-0.0951699	0.0313302	-0.0951474		-0.175621	0.113328	0.255199	-0.206015	0.909566		0.0563674	-0.197817	0.0816882	-0.0577454	0.0600456	0.497492	-0.0766989	-0.126856	-0.127756	-0.070563	0.0574094	0.0865165	0.137301
	13.5	-0.44335	-0.298009	0.00753473	0.0783279	0.0409725	-0.102088	0.68079		0.87506	0.0140286	-0.0346012	-0.106593	0.0200575	-0.0801469		-0.194597	0.0900132	0.258879	-0.212798	0.885865		0.046466	-0.203602	0.0952577	-0.0717263	0.0696973	0.4556	-0.0868335	-0.142662	-0.146723	-0.08451	0.0658964	0.099883	0.153118
	14	-0.46038	-0.294684	0.00558336	0.0683424	0.0746015	-0.0932701	0.672467		0.915202	0.00857549	-0.044531	-0.116921	0.00761875	-0.0464654		-0.208934	0.0358302	0.252738	-0.198619	0.856823		0.0626654	-0.200889	0.0786419	-0.0581371	0.0824977	0.43154	-0.0680877	-0.126996	-0.143408	-0.0730226	0.0501904	0.0845861	0.124443
	14.5	-0.490032	-0.32316	-0.0204661	0.0762362	0.053447	-0.0919306	0.685934		0.918285	-0.000649881	-0.0611433	-0.126659	-0.0118946	-0.0220546		-0.220878	0.00111594	0.240591	-0.20673	0.85371		0.0387973	-0.209841	0.0745536	-0.0751912	0.0807073	0.435892	-0.0698021	-0.133463	-0.141751	-0.0675727	0.0476955	0.0659257	0.12255
	15	-0.484353	-0.327438	-0.00832835	0.0399791	0.0173538	-0.0870778	0.720593		0.953194	0.00345463	-0.0650964	-0.134658	-0.0384825	0.0038034		-0.240997	-0.0392982	0.245357	-0.223034	0.822935		0.0269485	-0.227107	0.0954187	-0.0779212	0.0689153	0.373143	-0.0767528	-0.125591	-0.144699	-0.0741899	0.0489225	0.0650483	0.103262
	15.5	-0.512132	-0.329903	-0.00627428	0.0332468	0.0182406	-0.0945636	0.727652		0.983526	-0.0490929	-0.0948857	-0.152059	-0.0592397	0.0308		-0.269155	-0.0412553	0.240229	-0.210407	0.797996		0.0373496	-0.212882	0.0811647	-0.0648631	0.00828836	0.381356	-0.0825132	-0.135181	-0.15268	-0.0796891	0.0596794	0.0463878	0.098016
	16	-0.581135	-0.444347	-0.0581771	0.0210772	0.0248061	-0.102585	0.714268		1.0081	-0.00638642	-0.088909	-0.16031	-0.0267434	0.0579362		-0.287042	-0.0614796	0.244881	-0.220276	0.770227		0.0291857	-0.223516	0.0182695	-0.0809621	-0.000622527	0.341655	-0.0836643	-0.139853	-0.158917	-0.0834677	0.0391472	0.0485815	0.073088
	16.5	-0.556483	-0.382344	-0.0499795	-0.00612978	-0.00794468	-0.12045	0.711219		1.02161	-0.0437179	-0.0992153	-0.164407	-0.0605613	0.0827069		-0.296864	-0.0736004	0.231834	-0.223013	0.752894		0.0273923	-0.233151	0.0613297	-0.0743129	-0.002948	0.32624	-0.0986776	-0.145325	-0.148921	-0.0800568	0.0161405	0.038988	0.0690254
	17	-0.528054	-0.348605	-0.0121844	0.02229	-0.0229345	-0.132835	0.724356		1.06602	-0.0045003	-0.112016	-0.166905	-0.0576071	0.0941006		-0.308644	-0.0680035	0.234884	-0.215311	0.713452		0.0208241	-0.229398	0.0741723	-0.0804936	0.028415	0.294212	-0.0882148	-0.156661	-0.146045	-0.0928402	0.01839	0.0351565	0.0607818
	17.5	-0.523275	-0.354761	0.0101677	0.000140043	-0.0555659	-0.109903	0.766706		1.08184	-0.0141263	-0.132863	-0.176167	-0.0578403	0.120275		-0.31935	-0.080502	0.23018	-0.213799	0.684091		0.00352414	-0.231886	0.0698638	-0.0859919	-0.0167568	0.277088	-0.0929564	-0.158776	-0.159356	-0.0928895	0.0164064	0.0117286	0.0598746
	18	-0.630309	-0.483202	-0.0430796	0.0129778	-0.0397746	-0.11797	0.747993		1.08997	-0.0183384	-0.144205	-0.187028	-0.0942237	0.132807		-0.325512	-0.0863735	0.224163	-0.216802	0.674823		-0.313087	-0.398794	-0.0695198	-0.354337	-0.0105212	0.276203	-0.100769	-0.165159	-0.171851	-0.0995636	0.00667195	0.00924247	0.0478839
	18.5	-0.531764	-0.366275	-0.0481775	0.0246849	-0.0441828	-0.122769	0.769611		1.10155	-0.0194427	-0.156394	-0.205074	-0.10573	0.143657		-0.331769	-0.0804677	0.224566	-0.221808	0.667147		-0.00810878	-0.228403	0.0711277	-0.0785633	0.0109637	0.249294	-0.109792	-0.173463	-0.176416	-0.118513	0.020067	0.00301258	0.0590068
	19	-0.545373	-0.368266	-0.0520242	0.0147251	-0.0495972	-0.143237	0.801612		1.12485	-0.0269481	-0.160441	-0.235048	-0.0834953	0.156681		-0.332504	-0.0942023	0.211395	-0.225812	0.632551		-0.02687	-0.31478	-0.0434245	-0.215695	0.00188816	0.222974	-0.108577	-0.182241	-0.188967	-0.126116	0.0226846	0.000409476	0.0528143
	19.5	-0.559625	-0.365771	-0.0391862	-0.00853493	-0.0471927	-0.134029	0.825387		1.13182	-0.0344241	-0.175971	-0.282759	-0.0810075	0.170999		-0.336979	-0.0949234	0.20881	-0.222768	0.616881		-0.0199379	-0.240224	-0.0454254	-0.0992358	-0.00146628	0.211577	-0.120975	-0.183567	0.00617483	-0.132953	0.0145454	0.0112899	0.0397192
	20	-0.56459	-0.365481	-0.0322584	-0.00549766	-0.0425201	-0.148166	0.851173		1.12902	-0.0256776	-0.164582	-0.313659	-0.0693462	0.180739		-0.33049	-0.0877813	0.21522	-0.22853	0.594524		-0.0274799	-0.241774	0.0454797	-0.0791468	-0.0287134	0.182064	-0.117374	-0.185699	-0.187406	-0.13503	0.0271633	-0.0118748	0.026703
	20.5	-0.560536	-0.380904	-0.0332387	-0.0135611	-0.0351617	-0.122547	0.848509		1.1463	-0.0642991	-0.177571	-0.335607	-0.103086	0.183215		-0.333292	-0.0821845	0.198183	-0.231145	0.585999		-0.0348406	-0.244121	0.0526346	-0.0933155	-0.00377118	0.146588	-0.133122	-0.190628	-0.188661	-0.138282	0.0295764	-0.039339	0.0345521
	21	-0.602133	-0.420169	-0.0815096	-0.026111	-0.061543	-0.137465	0.858281		1.13986	-0.0490342	-0.189524	-0.34978	-0.0646039	0.187894		-0.322832	-0.0835923	0.191173	-0.234373	0.563996		-0.0705923	-0.274959	-0.0159313	-0.12114	-0.0744409	0.151962	-0.123463	-0.194237	-0.1881	-0.146108	0.0306194	-0.035215	0.039522
	21.5	-0.59907	-0.41673	-0.0711458	-0.0118497	-0.0638452	-0.15308	0.904278		1.15948	-0.054458	-0.198701	-0.348713	-0.0621939	0.192038		-0.320995	-0.084588	0.195433	-0.228857	0.532372		-0.0544261	-0.352705	0.0148267	-0.187234	-0.0442097	0.145566	-0.132584	-0.209937	-0.200671	-0.152134	0.0422557	-0.0213805	0.0360904
	22	-0.570445	-0.415601	-0.0623413	-0.0211363	-0.0389048	-0.147485	0.899059		1.16468	-0.060048	-0.225478	-0.343942	-0.0598616	0.194433		-0.314711	-0.0932409	0.172512	-0.239052	0.542347		-0.0517315	-0.261509	0.00392396	-0.110127	-0.0352783	0.12968	-0.122792	-0.202921	-0.205567	-0.147457	0.0487385	-0.0533782	0.0434663
	22.5	-0.581911	-0.413031	-0.0855337	-0.0184639	-0.0685178	-0.132689	0.918445		1.17106	-0.0604682	-0.22962	-0.346243	-0.0675581	0.196357		-0.307937	-0.0922794	0.169628	-0.238459	0.514579		-0.0626654	-0.254055	0.035846	-0.0992782	-0.0143078	0.0830128	-0.131036	-0.210021	-0.201553	-0.15556	0.0674301	-0.0513016	0.040863
	23	-0.569863	-0.405465	-0.0570193	-0.0174874	-0.06457	-0.126834	0.925923		1.17168	-0.0717165	-0.229667	-0.332295	-0.0805411	0.187659		-0.300537	-0.103817	0.168532	-0.236273	0.506407		-0.0649796	-0.246779	0.0217156	-0.0928006	-0.0399909	0.0906367	-0.128224	-0.207553	-0.197545	-0.154995	0.0860605	-0.0559228	0.0302528
	23.5	-0.595205	-0.424773	-0.0676632	-0.0302994	-0.0594966	-0.127936	0.959483		1.1847	-0.080336	-0.241338	-0.322135	-0.0663142	0.196093		-0.290171	-0.0929662	0.155867	-0.240604	0.466788		-0.0752162	-0.248082	0.0245824	-0.110333	-0.0568455	0.0387629	-0.135479	-0.201858	-0.200625	-0.154453	0.096163	-0.0668617	0.0570347
	24	-0.60743	-0.423667	-0.0814349	-0.017436	-0.0705301	-0.134649	0.980737		1.17735	-0.0806292	-0.248303	-0.325307	-0.0828734	0.194264		-0.275045	-0.0895325	0.157542	-0.237642	0.456494		-0.0964471	-0.221786	0.029123	-0.107323	-0.0322737	0.0187895	-0.130477	-0.200867	-0.203257	-0.164228	0.107308	-0.0808424	0.0509999
	24.5	-0.612676	-0.405986	-0.0777282	-0.0407423	-0.110767	-0.141645	0.981905		1.19099	-0.0825837	-0.262703	-0.307036	-0.0813963	0.191707		-0.277915	-0.0890518	0.142614	-0.242361	0.433218		-0.0823475	-0.222018	0.0057199	-0.103644	-0.0101096	-0.0284373	-0.136061	-0.20912	-0.213263	-0.165986	0.123976	-0.0801989	0.0460301
	25	-0.605645	-0.398255	-0.0862806	-0.0399714	-0.101695	-0.13719	0.974262		1.18744	-0.087558	-0.274563	-0.300525	-0.10814	0.194308		-0.264407	-0.0804677	0.138075	-0.249757	0.414753		-0.0820713	-0.227756	0.0049795	-0.120546	-0.0582243	-0.014339	-0.134504	-0.199144	-0.20852	-0.167563	0.129681	-0.0820415	0.0610973
	25.5	-0.615131	-0.407849	-0.0983717	-0.0634833	-0.0936202	-0.148227	0.962134		1.18756	-0.0951611	-0.282751	-0.295529	-0.0911141	0.184824		-0.241799	-0.0808454	0.132306	-0.25509	0.398268		-0.0778625	-0.214016	-0.00998272	-0.125148	-0.0947116	-0.0130716	-0.141239	-0.213993	-0.222234	-0.170424	0.154099	-0.0923954	0.0587307
	26	-0.621036	-0.402092	-0.0605206	-0.0742448	-0.112515	-0.150929	0.977208		1.19031	-0.097399	-0.274516	-0.288934	-0.0971002	0.194021		-0.232617	-0.0801586	0.135097	-0.252638	0.405803		-0.0893822	-0.211892	-0.00387652	-0.121831	-0.0505482	-0.0728444	-0.14407	-0.205187	-0.213758	-0.16541	0.154079	-0.10272	0.0479233
	26.5	-0.59855	-0.40217	-0.0775134	-0.0726105	-0.121144	-0.137151	0.991649		1.19186	-0.0943109	-0.279692	-0.276164	-0.0880821	0.188813		-0.226877	-0.0756605	0.122888	-0.239644	0.3705		-0.0851131	-0.182073	-0.00298872	-0.130838	-0.0469056	-0.0869721	-0.142018	-0.210625	-0.222897	-0.169787	0.170684	-0.104212	0.0438212
	27	-0.604387	-0.399091	-0.079969	-0.066613	-0.110699	-0.131579	0.995495		1.21812	-0.106566	-0.276304	-0.256967	-0.0897924	0.190113		-0.220619	-0.0716775	0.109861	-0.252618	0.358296		-0.0931728	-0.170643	0.00501677	-0.11379	-0.0287134	-0.106661	-0.142787	-0.206625	-0.215808	-0.173862	0.169396	-0.0957005	0.0452018
	27.5	-0.610134	-0.422622	-0.103414	-0.0878945	-0.10971	-0.148939	1.00573		1.19887	-0.0986695	-0.294281	-0.255452	-0.0903366	0.188938		-0.204282	-0.062853	0.10859	-0.260116	0.348249		-0.119194	-0.159764	-0.00444919	-0.115333	-0.0418431	-0.146155	-0.144624	0.01475	-0.216588	-0.17421	0.180746	-0.120415	0.0837771
	28	-0.590799	-0.403497	-0.0926669	-0.0634833	-0.150561	-0.126765	0.997054		1.21721	-0.107103	-0.276021	-0.255311	-0.0902589	0.1855		-0.196773	-0.0708878	0.108011	-0.257562	0.326883		-0.0956364	-0.143809	-0.0130578	-0.108706	-0.0466381	-0.169941	-0.145687	-0.21058	-0.218603	-0.17482	0.194039	-0.122463	0.06303
	28.5	-0.620312	-0.432162	-0.0774201	-0.0875656	-0.128665	-0.146398	1.01782		1.24047	-0.119808	-0.26068	-0.245825	-0.0665475	0.17714		-0.187034	-0.0813604	0.106605	-0.270147	0.313264		-0.127113	-0.144389	-0.00629426	-0.0992923	-0.0537174	-0.167367	-0.148552	-0.210608	-0.225513	-0.180259	0.194714	-0.116584	0.0660671
	29	-0.617012	-0.397225	-0.0964857	-0.0916564	-0.13407	-0.150745	1.04053		1.2491	-0.115517	-0.262798	-0.236395	-0.0701236	0.18049		-0.191319	-0.0966402	0.0864965	-0.268452	0.295613		-0.100259	-0.136236	-0.0260445	-0.0888531	0.00355509	-0.208797	-0.150198	-0.20541	-0.229042	-0.171713	0.201115	-0.152442	0.0752574
	29.5	-0.607721	-0.411123	-0.10923	-0.0796049	-0.177104	-0.145977	1.02729		1.23773	-0.117023	-0.240961	-0.247397	-0.0478116	0.176523		-0.179824	-0.0806737	0.0863724	-0.491475	0.295047		-0.11567	-0.124118	-0.016648	-0.0862665	-0.0383858	-0.235991	-0.142527	-0.205349	-0.2251	-0.187392	0.207516	-0.155777	0.0746657
	30	-0.619969	-0.39169	-0.117195	-0.109834	-0.184233	-0.140496	1.02558		1.23549	-0.114159	-0.237432	-0.243692	-0.0505325	0.180313		-0.173934	-0.0960565	0.0852352	-0.494131	0.271452		-0.114188	-0.112559	-0.0165515	-0.0790762	-0.0228689	-0.242603	-0.141459	-0.205959	-0.223009	-0.188339	0.211585	-0.154226	0.0785311
	30.5	-0.615945	-0.395997	-0.103451	-0.101919	-0.14646	-0.156823	1.02841		1.22718	-0.124039	-0.20769	-0.2385	-0.0435357	0.177353		-0.167282	-0.0870603	0.0838085	-0.498074	0.260451		-0.116049	-0.112787	-0.0246671	-0.0875285	-0.0195556	-0.281165	-0.156938	-0.20691	-0.224962	-0.180524	0.219786	-0.158292	0.0530904
	31	-0.603441	-0.389665	-0.115971	-0.108364	-0.183926	-0.147523	1.0337		1.22057	-0.119641	-0.190701	-0.241419	-0.0440022	0.172328		-0.17037	-0.0814978	0.0885745	-0.489371	0.253234		-0.119163	-0.0959691	-0.0315543	-0.0597282	-0.0282195	-0.300362	-0.145672	-0.210815	-0.218837	-0.187809	0.201421	-0.161919	0.0507238
	31.5	-0.61523	-0.402988	-0.116606	-0.110682	-0.190483	-0.134442	1.0404		1.20223	-0.112185	-0.166653	-0.245713	-0.0219234	0.165504		-0.168316	-0.0888114	0.0881196	-0.501445	0.237741		-0.121147	-0.0856824	-0.0415455	-0.0457716	-0.066168	-0.315256	-0.155106	-0.207878	-0.230368	-0.192231	0.215696	-0.177713	0.0476078
	32	-0.610075	-0.399819	-0.116382	-0.136984	-0.195121	-0.158951	1.04373		1.21684	-0.108315	-0.14957	-0.243103	-0.0266656	0.1602		-0.156182	-0.0973956	0.0940642	-0.498422	0.205303		-0.126474	-0.0955089	-0.0425367	-0.0574991	-0.0232599	-0.300922	-0.152549	-0.202076	-0.221933	-0.184307	0.212608	-0.175724	0.0483572

## Sheet: G
	G
	F(30) - F(0)
Tyramine	no	1 nM	300 nM	30 µM	10 mM
	0.05	0.12	0.66	0.23	0.4
	0.06	0.08	0.02	0.37	0.14
	0.08	0	0.02	0.19	1.11
	0.1	0.05	0.08	0.13	0.24
	0	0.08	0.04	0.46	0.16
			0.2	0.6	0.43
					0.8
					0.03
