# Supplementary material for: Tyramine induces dynamic RNP granule remodeling and translation activation in the Drosophila brain
Source: eLife. 2021 Apr 23;10:e65742. doi: 10.7554/eLife.65742 (PMC8064753; doi:10.7554/eLife.65742)
Supplement: Figure 4—figure supplement 1—source data 1. [file elife-65742-fig4-figsupp1-data1.xlsx]

## Sheet: D
	D
	number of Imp+ granules
	control	Tyramine
Repl 1	89.172	82.8025
	89.172	57.3248
	108.28	25.4777
	121.019	44.586
	152.866	31.8471
	165.605	38.2166
	63.6943	63.6943
	89.172	63.6943
	114.65	89.172
	159.236	133.758
	70.0637	82.8025
	114.65	101.911
	44.586	12.7389
	57.3248	19.1083
	95.5414	6.36943
	63.6943
	127.389
	114.65
	70.0637
	89.172
Repl 2	212.903	96.7742
	206.452	116.129
	103.226	122.581
	83.871	116.129
	103.226	109.677
	70.9677	135.484
	77.4194	180.645
	90.3226	135.484
	38.7097	64.5161
	70.9677	51.6129
	64.5161	25.8065
	77.4194	32.2581
Repl 3	173.684	23.6842
	150	39.4737
	71.0526	15.7895
	63.1579	15.7895
	39.4737	7.89474
	47.3684	39.4737
	150	78.9474
	110.526	7.89474
	126.316	23.6842
	86.8421	63.1579
	118.421	94.7368
	63.1579	7.89474
		31.5789
