# Supplementary material for: Tyramine induces dynamic RNP granule remodeling and translation activation in the Drosophila brain
Source: eLife. 2021 Apr 23;10:e65742. doi: 10.7554/eLife.65742 (PMC8064753; doi:10.7554/eLife.65742)
Supplement: Figure 4—source data 1. [file elife-65742-fig4-data1.xlsx]

## Sheet: B
	B
	number of Imp+ granules
	ctrl	ala	ctrl + Tyramine	ala + Tyramine
Repl 1	98.0843	155.3	81.7369	179.821
	130.779	163.474	81.7369	147.126
	171.648	106.258	163.474	81.7369
	81.7369	130.779	57.2158	98.0843
	114.432	73.5632	57.2158	130.779
	122.605	187.995	65.3895	98.0843
	98.0843	106.258	130.779	73.5632
	98.0843	155.3	147.126	98.0843
	179.821	130.779	49.0421	106.258
	163.474	147.126	73.5632	114.432
	106.258	106.258	106.258	138.953
	106.258	89.9106	89.9106	57.2158
	73.5632	130.779	40.8685	147.126
	98.0843	147.126	73.5632
	171.648	171.648	81.7369
	114.432	130.779	65.3895
	89.9106		49.0421
	106.258		40.8685
	155.3		8.17369
	106.258		0
	147.126
	130.779
	122.605
	130.779
Repl 2	138.953	65.3895	81.7369	89.9106
	98.0843	98.0843	32.6948	114.432
	81.7369	32.6948	40.8685	40.8685
	65.3895	65.3895	49.0421	16.3474
	98.0843	65.3895	106.258	122.605
	106.258	57.2158	32.6948	73.5632
	114.432	114.432	49.0421	114.432
	98.0843	114.432	57.2158	147.126
	81.7369	65.3895	49.0421	106.258
	89.9106	98.0843	73.5632	73.5632
	138.953	81.7369	57.2158	89.9106
	138.953	114.432	73.5632	163.474
	40.8685	122.605	98.0843	114.432
	49.0421	106.258	106.258	73.5632
	98.0843	122.605	73.5632	57.2158
	40.8685	138.953	65.3895	147.126
	57.2158	65.3895	49.0421
	57.2158		16.3474
	73.5632
	49.0421
	98.0843
	114.432
	98.0843
	98.0843
Repl 3	73.5632	57.2158	81.7369	16.3474
	73.5632	49.0421	65.3895	8.17369
	114.432	57.2158	98.0843	57.2158
	106.258	163.474	49.0421	57.2158
	138.953	24.5211	49.0421	8.17369
	138.953	24.5211	24.5211	16.3474
	73.5632	24.5211	16.3474	73.5632
	57.2158	32.6948	57.2158	81.7369
	89.9106	24.5211	24.5211	114.432
	114.432	16.3474	81.7369	89.9106
	49.0421	122.605	24.5211	73.5632
	49.0421	98.0843	65.3895	81.7369
	114.432	73.5632	32.6948	32.6948
	122.605	89.9106	49.0421	24.5211
	24.5211	49.0421		81.7369
	16.3474	24.5211		65.3895
				32.6948
				40.8685

## Sheet: C
	c
	Me31B partition coefficient					Mean
	ctrl	ala	ctrl + Tyramine	ala + Tyramine			ctrl	ala	ctrl + Tyramine	ala + Tyramine
Repl 3	5.38462	8.72892	3.23256	3.31579		Repl 1	5.593	5.932	3.404	3.854
	4.96154	7.98193	2.53488	3.42105		Repl 2	4.466	3.7	3.126	3.554
	8.96154	3.8012	2.5814	6.38596		Repl 3	4.411	4.095	3.363	3.274
	3.96154	4.57831	3.95349	3.77193
	4.57692	5.56627	3.67442	4.36842
	6.38462	4.46988	2.44186	4.89474
	2.69231	5.22892	4.39535	9.10526
	4.23077	7.8253	2.95349	2.87719
	6.53846	5.96386	2.95349	3.15789
	4.34615	3.81325	2.7907	2.75439
	3.69231	3.87349	4.67442	5.08772
	5.23077	6.03012	5.97674	3.21053
	4.11538	13.6205	3.72093	3.24561
	3.76923	3.86747	2.46512	2.96491
	5.23077	14.7169	3.32558	4.63158
	2.92308	5.1988	3	4.45614
	4.96154	6.78916	3.48837	4.08772
	3.26923	5.46386	3.16279	4.5614
	3.5	4.70482	5.88372	5.15789
	4.73077	4.05422	2.4186	8.59649
	3.15385	5.71084	3.30233	3.82456
	3.11538	6.77108	2.65116	5.92982
		7.90964	3.30233	4.19298
	2.4	3.89157	3.16279	6.59649
	2.65	3.8494	4.46512	4.85965
	5.55	4.6747	3.90698	5.57895
	3.9	4.25301	2.44186	4.12281
	5.7	4.54819	2.4186	4
	4.55	8.22892	2.2093	5.75439
	5	7.01807	2.53488	4.07018
	4.05	5.96386	2.88372	3.77193
	3.05	10.1747	3.11628	4.47368
	4.55	6.74699	4.60465	3.35088
	4.65	4.24699	2.76744	3.08772
	2.65	8.89759	2.69767	4.01754
	2.5	4.48795	2.69767	4.07018
	2.75	4.63253	2.97674	3
	3.1	7.6506	2.90698	3.94737
	5.8	4.72892	3.48837	9.96491
	2.4	9.63855	3.4186	3.29825
	3.3	3.37952	3.5814	2.73684
	4.15	4.69277	2.90698	5.03509
	4.95	6.72289	4.88372	2.84211
	2.5	4.87952	4.09302	7.77193
	3.2	5.75904		4.73684
	3.8	6.12651	3.4	3.01754
	2.55	9.42169	3.68889	2.87719
	3.5	4.46386	3.35556	3.64912
	2.5	4.57229	3.2	3.82456
	3.3	3.23494	3.71111	3.84211
	2.75	4.78313	2.48889	4.19298
	2.9	7.6506	3.2	7.40351
		3.83133	5.4	4.45614
	8.975	3.39759	5	3.29825
	6.65	6.18675	3.04444
	3.375	4.22892	3.62222	2.82143
	8.575		5.24444	2.83929
	3.7	6.26554	3.73333	3.75
	3.675	3.53672	4.57778	3.41071
	4.25	3.60452	3.31111	5.51786
	4.425	6.42938	6.22222	4.10714
	3.775	8.11864	2.6	3.28571
	7.275	9.71751	3.75556	3.55357
	9.225	12.4011	3.13333	3.94643
	5.225	7.80226	3.62222	3
	4.4	8.31073	4.77778	4.125
	5.35	3.46328	4.28889	3.98214
	6.725	11.0452	2.55556	3.16071
	4	3.33898	3.48889	2.91071
	3.4	8	5.35556	2.89286
	5.7	4.15819	4.48889	2.69643
	3.65	5.70056	3.02222	8.91071
	6.125	6.66102	3.93333	4.375
	4.175	4.82486	2.84444	8.57143
	8.1	5.29944	3.4	3.55357
	5.275	4.44068	3.08889	3.44643
	3.6	5.76271	3.55556	3.28571
	5.6	3.35593	2.66667	3.05357
	3.925	3.38983	2.62222	3.07143
	6.15	12.5198		3.14286
	7.825	13.4181	3.03333	6.58929
	9.775	6.31073	4.03333	5.57143
	6.45	3.81921	6.13333	4.57143
	6.375	3.65537	3.53333	4
		4.53107	4.9	3.64286
	6.82927	4.41243	3.23333	3.85714
	6.17073	7.57062	2.53333	2.71429
	4.19512	4.54237	3.33333	3.71429
	8.68293	4.06215	2.63333	7.30357
	4.60976	6.63277	3.06667	3.53571
	5.12195	4.50282	3.3	9.85714
	8.43902	4.42373	3.26667	3.57143
	6.73171	4.32203	3.76667	6.08929
	3.80488	8.62147	3.4	4.57143
	4.09756	5.9209	4.16667	3.57143
	4.58537	7.82486	2.46667	3.07143
	11.7561	7.58192	2.8	3.08929
	5.58537	6.57627	2.46667	3.32143
	4.90244	3.87571	6.23333	5.66071
	3.82927	3.62712	3.33333	4.08929
	7.92683	6.76271	2.93333	4.94643
	4.39024	3.72316	2.8	5.41071
	5.90244	3.46328	3.13333	4.46429
	6.31707	4.11864	3.56667	2.67857
	5.26829		3.03333	3.05357
	4.87805	4.91129	2.5	3.46429
	3.70732	6.12903	3.63333	4.51786
	4.14634	3.04839	4.56667
	5.2439	4.34677	3.76667	4.5618
	5.87805	6.17742	2.4	3.53933
	13.0244	9.24194	3.43333	2.85393
	3.41463	4.66129	3.26667	4.39326
	5.90244	3.16935	3	3.08989
	3.92683	4.04032	4.73333	6.96629
	6.65854	8.16129	3	9.04494
		5.51613	3.06667	4.17978
	2.83333	4.41935	3.53333	7.05618
	4.08333	7.57258	3.3	2.47191
	5.33333	5.76613	2.7	4.29213
	5.25	3.71774	2.2	3.53933
	3	3.70161	5.1	4.65169
	3.25	3.47581	3.13333	3.4382
	3.25	3	3.4	3.91011
	2.33333	4.3629	2.83333	4.48315
	4.25	6.80645	3.6	2.92135
	3.58333	3.60484	2.53333	4.82022
	2.5	4.6371	2.56667	3.48315
	2.33333	5.34677	5.2	2.8427
	3.25	6.6129	2.56667	5.50562
	2.91667	5.16129		3.33708
	2.41667	3.44355	2.78571	5.19101
	2.5	3.16935	2.78571	5.52809
	5.25	3.06452	4.75	2.96629
	4.41667	4.28226	4	2.53933
	5.16667	3	3.53571	3.97753
	4	7.1371	2.71429	3.35955
	3.33333	3.46774	6.92857	5.59551
	2.41667	3.26613	3.14286	2.70787
	3	6.24194	6.14286	2.41573
	3.08333	2.89516	4.32143	4.35955
	4.75	5.34677	3.25	2.96629
	2.58333	3.32258	2.5	2.88764
	3.16667	9.5	3.89286	4.74157
	5.66667	5.37097	4.82143	3.34831
	2.58333	3.87903	2.53571	3.94382
	3.83333		2.78571
	2.5	4.42029	3.17857	4.01351
	3.41667	3.21014	2.85714	4
	4.91667	4.06522	2.78571	3.35135
	2.25	3.34058	3.53571	3.2027
	2.91667	3.84783	2.42857	3.85135
	2.25	4.63043	3.07143	3.17568
	2.08333	5.46377	2.96429	4.52703
		3.65942	2.35714	2.94595
	2.63636	3.91304	3.35714	3.02703
	3.27273	6.31884	3.10714	3.37838
	3.63636	5.71739	3.46429	3.06757
	2.90909	6.86232	2.46429	5.13514
	2.72727	3.86232	2.75	6.47297
	3	4.94928	3.57143	4.55405
	3.27273	9.63043	2.75	3.45946
	3.45455	8.23913	3.39286	3.83784
	2.54545	3.75362	2.75	3.33784
	3	7.7029	3.03571	5.16216
	2.27273	6.24638	3.25	5.24324
	2.63636	8.41304	3.64286	9.12162
	2.63636	3.62319	6.5	3.7973
	3.81818	5.65942	2.39286	4.22973
	3.45455	5.26087	4.03571	3.27027
	2.63636	5.15217	3.75	6.55405
	3.09091	10.6594	3.35714	4.78378
	2.63636	4.05072	3.46429	3.22973
	2.54545	4.56522	2.42857	3.21622
	2.63636	5.16667	2.85714	4.72973
	2.54545	5.76087	3.57143	5.22973
	3.09091	3.18841	6.17857	5.7027
	2.81818	3.57971	2.82143	3.09459
	3.09091	3.28261	4	5.85135
	3.18182	5.94203		5.68919
	2.63636	3.04348	2.06349	4.08108
	4.90909	3.9058	1.85714	5.12162
	4.54545	7.21014	4.25397	3.52703
	3.81818	4.96377	1.94444	5.13514
	3.63636	4.94928	3.07937	3.45946
	3	6.94203	2.48413	3.91892
	2.72727	4.3913	3.34921	3.66216
	2.27273	3.38406	1.96032	3.55405
	5.72727	6.42029	2.34921	3.78378
	3.45455	3.71014	3.04762	5.2027
	5.36364	5.02899	1.99206	2.66216
	3.63636		2.01587	3.7027
	4.72727	10.1667	2.42857	2.91892
	2.90909	7.99573	1.94444
	5.27273	8.92735	2.84127	2.87097
	3.09091	4.48718	2.84127	3.32258
		9.38462	2.0873	2.25806
	7.16279	6.48291	2.7619	2.64516
	9.83721	9.01282	2.53175	2.64516
	4.60465	6.2265	2.49206	3.29032
	6.02326	8.58974	2.59524	5.77419
	7.93023	11.4744	3.16667	2.77419
	6.93023	7.86752	4.65873	2.12903
	3.48837	10.0556	2.34921	3.70968
	5.23256	10.1581	2.60317	2.67742
	3.90698	4.32479	3.21429	3.06452
	8.90698	6.35897	3.20635	2.29032
	10.4651	9.39316	2.69841	3.19355
	4.09302	3.88034	3.07937	3.54839
	8.4186	7.68803		2.83871
	5.2093	6.2265	2.42105	3.35484
	3.81395	4.50855	2.85263	2.45161
	5.04651	4.18803	2.65263	4.29032
	7.72093	5.70085	3.38947	4.6129
	7.97674	10.5556	2.03158	5.12903
	6.88372	4.73077	2.86316	2.96774
	6.60465	4.44872	2.21053	3.03226
	3.90698	5.9188	3.01053	2.93548
	7.37209	8.99145	2.14737	2.54839
	7.86047	4.82906	2.97895	4.96774
	9.60465	5.88462	2.47368	2.93548
	4.67442	6.34615	2.94737	6
	3.44186	4.57265	6.38947	5
	6.53488	6.16667	2.91579	3.29032
	4.51163	13.188	2.04211	2.29032
	4.95349	7.68803	2.74737	4.29032
	4.13953	6.00855	2.06316	3.58065
	3.60465	6.17949	2.25263	5.03226
		6	2.02105	3.45161
	4.57627	7.73932	2.4	2.22581
	9.01695	3.98291	2.47368	3.25806
	14.7288		2.08421	4.45161
	6.66102	5.66228	2.45263	2.35484
	5.91525	10.8202	2.17895	2.96774
	10.5424	7.42105	4.27368	2.64516
	5.28814	13.3553	2.48421
	7.33898	12.2763	3.31579	2.65625
	4.13559	5.29825	3.22105	2.5
	4.83051	6.60088	3.09474	3.28125
	6.94915	9.18421	2.6	2.75
	8.30508	8.81579	3.03158	3.6875
	5.52542	8.59211	3.32632	3.8125
	10	7.64035	3.2	2.3125
	5.25424	9.17982	2.32632	2.8125
	4.84746	4.85526	2.38947	3.125
	4.33898	12.3991	2.31579	3.71875
	7.55932	20.1754	2.47368	2.4375
	5.98305	8.29825	2.4	2.375
	5.18644	6.15351	2.21053	2.21875
	5.27119	7.53509	3.6	2.96875
	5.83051	8.60526	2.38947	2.9375
	15.0678	4.92982	2.72632	5.4375
	4.9661	5.49123	4.01053	2.3125
		14.5877	3.06316	2.5
	8.35714	6.07456	3.15789	3.46875
	5.27381	10.9035		3.5625
	9.45238	11.5921	6.3125	2.6875
	5.75	10.6404	3.59375	3.1875
	4.94048	6.72368	3.71875	4.3125
	10.2143	5.5	2.84375	2.78125
	6.52381	8.64035	3.1875	3.34375
	5.17857	23.2588	3.375	2.4375
	4.35714	6.89474	3.625	3.03125
	11.1429		3.8125	3.25
	3.83333	3.3481	3.375	4.3125
	8.92857	3.03165	5.40625	3.21875
	5.91667	4.13291	3.0625	2.71875
	11.3452	3.86709	4.9375	4.03125
	6.80952	4.79747	3.25	3.4375
	4.52381	4.1519	3.3125	3.4375
	7.5	5.0443	7.75	3.03125
	7.38095	3.81013	3.53125	2.46875
	7.03571	3.3481	6.5	1.96875
	5.75	3.67089	4.34375	2.65625
	4.5	3.5	4.71875	3.1875
	9.53571	3.10759	4.9375	3.625
	4.02381	6.24051	5.03125	3.03125
	4.64286	7.05696	5.46875	4.15625
	8.15476	4.53797	2.84375	2.21875
	6.16667	3.11392	7.84375	2.34375
	3.77381	12.8608	2.84375	2.75
	5.44048	5.68354	4.9375	2.6875
	5.52381	6.67089	2.75
	5.25	4.31646	3.84375	5.30769
	6.4881	4.46835	3.53125	9.30769
	6.78571	7.41772	4.5	2.61538
	6.16667	3.07595	5.25	3.30769
	8.78571	4.03165	6.34375	3
	5.19048	10.3038	3.4375	2.84615
	5.27381	6.01899	4.09375	4.42308
	4.86905	3.33544	5.5625	3.73077
	7.65476	3.43671	3.21875	2.92308
		5.27215	5.75	2.57692
	4.25	4.94304	3.625	5.34615
	8.54762	12.1392	3.0625	3.19231
	8.44048	4.67089	3.28125	2.76923
	8.60714	4.82911	7.0625	2.73077
	11.4286	3.70886	3.53125	3.30769
	5.07143	3.57595	5.15625	6.42308
	4.29762	3.96835	6.6875	3.57692
	3.94048	5.99367	3.6875	4.15385
	5.82143	7.78481	3.6875	2.92308
	3.45238	3.56329	3.75	2.73077
	7.10714	6.21519	4.84375	3.73077
	4.61905	3.10127	5.15625	4
	8.60714	3.78481	6.03125	4.03846
	6.57143	3.72152	3.25	3.15385
	5.41667	4.58861	4.625	3.76923
	7.4881	3.87975	4.1875	3.46154
	4.63095	5.63924	4.96875	3.96154
	6.22619	3.21519	6.4375	3.84615
	4.75	8.03797	4.6875	3.19231
	4.04762		4.71875	3.69231
	7.45238	6.1194	7.875	5.38462
	6.63095	4.43284	3.5625	2.61538
	4.91667	7.06716	2.9375	4.03846
	4.59524	4.64179		3.73077
	8.5	3.77612	3.96774	3.57692
	4.45238	2.91791	3.35484	4.84615
	4.5119	9.80597	2.87097	3.30769
	4.38095	3.8806	3.19355	4.07692
	3.59524	3.82836	3.25806	3.26923
	7.59524	5.71642	3.93548	3.92308
	7.69048	4.55224	6.16129	4.15385
	5.75	4.51493	2.58065	4.11538
	6.83333	7.1194	4.12903	2.96154
	8.05952	5.46269	6	3.19231
	4.67857	4.29851	3.58065	5.38462
	4.07143	4.80597	4.6129	3.42308
	4.41667	8.52239	6.35484	2.57692
	6.97619	4.95522	3.6129	3.11538
	5.52381	6.35821	4.09677
	8.71429	3.64925	3.19355	1.14474
	8.15476	4.79851	4.58065	0.855263
	5.36905	3.91045	5.48387	0.828947
		3.76119	3.74194	1.46053
	6.41441	4.92537	4.41935	1.10526
	3.36937	5.91791	5.41935	1.01316
	3.27027	4.31343	3.96774	0.894737
	4.2973	3.84328	2.96774	1.30263
	3.98198	4.52985	3.06452	0.947368
	4.87387	6.03731	2.80645	1.55263
	2.93694	3.74627	2.93548	2.02632
	9.73874	6.86567	4.41935	0.986842
	6.63964	4.69403	4.48387	0.947368
	5.38739	4	7.35484	1.18421
	4.12613	9.82836	2.58065	1.60526
	4.7027	4.22388	3.80645	1.10526
	3.34234	4.24627	3.80645	0.842105
	5.51351	5.29851	4.93548	1.13158
	5.03604	5.73134	5.3871	1.61842
	3.56757	7.04478	6.3871	2
	8.26126	4.68657	4.19355	1.96053
	3.75676	5.30597	6.90323	0.907895
	5.66667	4.04478	3.45161	1.40789
	6.84685	9.27612	2.90323	1.42105
	5.89189	4.69403	3.90323	0.894737
	7.81081	5.6791	2.41935	0.986842
	4.5045	7.89552	3.54839	1.06579
	10.0721	6.00746	4.48387	0.881579
	3.15315	3.47761	3.64516	1.28947
	2.89189	4.02222	5.32258	1.10526
	4.42342	5.33333	3.16129	1.15789
	3.23423	12.4074	3.51613	1.35526
	5.13514	4.28148	3.77419	2.30263
	5.25225	6.68889		1.19737
	3.45045	4.7037	2.63158	0.802632
	8.20721	4.46667	3.31579	1.68421
	3.53153	3.65185	3.05263	0.828947
	7.76577	3.5037	3	1.14474
	3.43243	5.79259	2.42105	1.06579
	4.94595	4.97778	3.84211	1.98684
	4.21622	6.46667	3.52632	1.17105
	4.03604	3.84444	2.84211	1.52632
		12.8	3.52632	1.19737
	4.37681	4.86667	5.73684	0.921053
	3.95652	5.37778	2.52632	1.14474
	6.76812	5.38519	2.26316	1.23684
	4.24638	3.55556	3.47368	1.23684
	6.33333	10.1481	4.31579
	4.47826	3.87407	3.57895	2.51899
	4.95652	4.78519	4.47368	4.29114
	4.69565	5.54815	4.05263	4.22785
	5.78261	5.48148	2.57895	5.02532
	4.76812	3.25926	2.31579	2.65823
	4.68116	5.02222	6	4.16456
	4.5942	3.28889	2.31579	4.37975
	5.84058	4.87407	2.63158	3.17722
	5.5942	5.78519	3.68421	2.60759
	6.7971	5.67407	4.73684	6.81013
	8.72464	4.43704	3.78947	2.56962
	16.4638	4.94074	3.68421	5.48101
	8.3913	4.21481	4.57895	3.31646
	16.2899	3.74074	3	3.3038
	3.47826	6.00741	5.52632	2.82278
	5.53623	8.27407	3.68421	7.02532
	4.15942	4.86667	2.68421	6.36709
	6.17391	4.37037	6.47368	2.44304
	6.24638	6.64444	4.47368	2.96203
	3.88406	10.5037	2.57895	2.46835
	5.82609	5.4963	3.42105	3
	4.5942	3.66667	2.89474	5.74684
	8.42029	5.85185	2.52632	2.73418
	4.7971	9.03704	5.36842	3.18987
	4.43478	7.74074	2.36842	3.22785
	6.72464	4.84444	4	3.17722
	3.95652	5.7037		3.18987
		4.66667	3.85	5.88608
	3.27273	4.13333	3.85	3.51899
	4.34545	7.37037	2.65	2.46835
	10	3.6963	3.5	3.40506
	6.98182	3.59259	2.55	4.35443
	5.01818	5.06667	2.15	4.94937
	4.56364		3.5	3.13924
	6.58182	3.20139	3
	4.10909	4.0625	4.25	2.47059
	8.89091	4.91667	2.75	3.17647
	3.87273	6.40972	2.7	6.36765
	5.16364	3.23611	4.85	3.02941
	5.69091	5.44444	5.5	5.5
	5.07273	3.76389	3.15	2.75
	4.76364	6.38889	2.2	5.72059
	3.89091	6.34722	3.75	2.70588
	4.94545	4.29167	2.55	6.48529
	6.07273	2.90972	2.25	2.82353
	4.67273	6.21528	3.65	4.42647
	3.58182	3.90278	3.85	5.76471
	5.43636	3.47222	3.4	3.80882
	3.4	3.3125	3.85	2.77941
	7.21818	3.26389	3.85	3.5
	10.6545	6.11806	3.55	3.67647
	3.92727	5.15278	2.35	4.64706
	4.03636	6.20833	3.5	3.80882
	5.96364	5.54167	3.15	3.35294
	4.6	5.24306	2.9	3.64706
	3.65455	3.54861	3.05	3.60294
	6.63636	4.52778	2.7	3.17647
	4.2	3.03472	4.85	3.89706
	5.67273	4.72222	2.6	3.57353
	7.63636	3.33333	2.45	4.13235
	3.21818	3.20833	2.35	2.82353
	4.03636	3.82639	3.65	2.54412
	3.72727	9.26389	2.95	6.16176
	4.03636	7.47222	2.4	4.35294
	4.10909	3.34028	2.8	3.32353
	5.94545	8.74306	3.45	5.57353
	3.6	5.69444	4.9	3.25
	6.45455	4.46528	3.9	3.38235
	5.63636	5.45139	3.95	2.73529
	6.58182	7.19444	4.15	3.08824
	4.36364	3.61806	3.55
	6.01818	4.9375	2.8	3.28378
		5.97222	3.9	3.7973
	3.14286	4.20833		6.78378
	3.95238	3.64583	3.27273	2.91892
	3.52381	5.65972	4.36364	3.55405
	3.42857	6.56944	2.54545	4.24324
	2.57143	5.60417	3.09091	4.25676
	5.35714	6.0625	2.45455	2.87838
	6.95238	3.0625	2.45455	3.25676
	3.16667	5.04861	3.54545	4.98649
	3.59524	5.04861	3.09091	4.16216
	3.54762	4.35417	3.36364	11.9595
	3.04762	6.84722	3.27273	4.71622
	3.09524	5.84722	2.54545	3.01351
	3.85714	14.0069	4.18182	4.87838
	4.85714	10.6806	2.90909	4.37838
	3	6.20139	2.45455	6.97297
	2.85714	4.18056	2.54545	3.63514
	6.40476		2.36364	3.82432
	4.83333	6.72727	2.54545	3.81081
	7.40476	7.03557	3.54545	9.91892
	4.59524	10.3439	2.54545	4.31081
	4.16667	7.1502	2.54545	7.45946
	3.78571	5.96443	2.45455	3.78378
	6.54762	3.39921	2.90909	8.21622
	3.52381	9.03953	3.09091	4.05405
	5.83333	7.09486	2.63636
	3.71429	4.26877	3.45455	5.80769
	10.5238	5.70356	2.27273	5.42308
	4.78571	4.37945	2.63636	7.26923
	8.7381	3.12648	2.45455	3.55769
	3.2381	4.07115	2.45455	5.63462
	3.80952	8.31225	3.45455	4.80769
	5	10.6166	2.72727	5.75
	11.2381	3.68379	2.63636	3.28846
	8.40476	6.79051	2.90909	6.82692
	4.2381	5.57708	3.36364	5.96154
	6.04762	5.09881	2.27273	4.5
	3.33333	7.24901	3.09091	4.01923
	5.07143	12.1818	3.27273	3.48077
	5.21429	7.68379	2.36364	4.25
	5.64286	8.84585	2.54545	3.94231
	3.45238	3.80237	2.27273	3.36538
	7.52381	3.09091	2.45455	8.75
	3.7619	3.6917		3.34615
	3.16667	6.07115	2.33333	3.75
	3.38095	5.34783	2.44444	6.61538
	3.57143	5.49407	3.44444	5.26923
		12.8538	3.11111	3.57692
	13.7778	3.85771	3.88889	2.86538
	6.11111	3.96443	3.44444	2.69231
	4.06173	4.86166	3.33333	7.23077
	5.02469	4.65217	2.66667	3.15385
	4.16049	3.31225	2.66667	4.86538
	5.41975	3.34387	3.11111	5.51923
	6.18519		4.44444	3.90385
	11.4691	9.99265	3.77778	3.51923
	5.16049	11.5221	3.55556
	10	16.9559	2.88889	2.93333
	13.0741	7.83088	2.33333	3.81111
	11.0617	8.01471	2.77778	7.74444
	10.8272	19.4265	2.66667	3.4
	7.09877	8.52206	2.88889	4.48889
	8.8642	9.66912	2.77778	7.04444
	7.5679	4.17647	3.55556	5.77778
	5.88889	8.52941	3.55556	5.67778
	9.45679	11.5	5.88889	3.07778
	10.3457	10.4632	2.66667	2.25556
	5.11111	7.67647	2.44444	2.83333
	7.67901	11.1397	4.11111	2.76667
	6.75309	5.97059	2.44444	4.52222
	5.38272	15.4926	2.77778	3.62222
	4.35802	8.92647	2.33333	2.92222
	8.97531	8.42647	2.44444	2.9
	4.28395	6.63235	2.77778	4.17778
	8.75309	10.2794	2.88889	2.8
	7.25926	5.52941	2.44444	8.35556
	4.97531	6.22059	2.55556	4.05556
	16.1358	5.08824	3.44444	4.13333
	4.69136	6.42647	2.55556	5.08889
	3.75309	5.84559	3.44444	4.51111
	14.0988	5.51471		7.16667
	7.44444	5.80147	2.44118	4.67778
	7.06173	8.94853	2.82353	4.1
		15.3162	3.67647	3.16667
	3.86486	4.30147	2.82353	3.23333
	5.05405	6.74265	2.52941	3.78889
	4.5	8.44853	3.02941	2.4
	5.35135	9.38235	2.29412	3.05556
	5.83784	6.83088	2.88235	2.85556
	8.2027	4.14706	3.08824	2.88889
	6.18919	5.65441	2.97059	2.9
	8.55405	5.07353	2.55882	4.95556
	13.2703	5.99265	3.5	4.57778
	4.54054	5.17647	3.88235	2.78889
	9.93243	7.75735	2.76471	5.28889
	9.72973		3.35294	3.68889
	5.32432	5.46	3.08824	2.93333
	4.39189	4.13	2.97059	4.9
	4.37838	4.38	3.47059	2.54444
	11.8514	7.85	2.73529
	5.81081	5.91	2.35294	3.27273
	4.25676	4.48	2.44118	2.62338
	6.2027	3.83	3.20588	7.90909
	3.78378	4.01	2.5	4.16883
	3.82432	3.33	2.58824	5.07792
	9.89189	3.55	2.44118	6.33766
	5.87838	3.61	2.26471	2.67532
	7.27027	8.94	3.70588	3.12987
	10.3919	5.21	1.97059	3.1039
	7.09459	9.38	2.55882	3.44156
	6.06757	3.81	4.5	3.5974
	7.52703	10.33	3.97059	8.2987
	7.25676	3.61	3.55882	4.36364
	3.98649	5.19	2.97059	3.75325
	6.48649	4.11	3.17647	2.68831
	8.28378	2.99	2.26471	5.93506
	11.6486	3.01	2.44118	5.07792
	4.91892	3.9	2.38235	2.96104
	7.78378	4.73	2.5	3.42857
	6.56757	9.97	2.44118	4.46753
	3.98649	6.78	2.61765	2.72727
	6.24324	5.57	2.5	3.44156
	6.01351	3.86	2.64706	3.05195
	5.7973	3.2	2.5	5.09091
	5.54054	7.21	4.17647	9.25974
	10.1892	9.38	2.73529	7.75325
	10.2838	3.14		3.07792
		9.32	4.08333	4.98701
	4.725	6.28	2.63889	3.54545
	12.225	4.13	2.27778	3.45455
	8.875	5.79	2.91667	4.49351
	4.5	4.75	2.61111	3.41558
	5.55	3.71	3.19444	4.05195
	3.35	3.49	2.25	5.02597
	3.6		3.47222	3.75325
	3.475	5.56627	2.38889	5.90909
	10.3	4.75904	2.08333	2.77922
	10.25	8.28916	5.25	3.94805
	7.3	5.38554	3.38889	3.96104
	5.55	6.01205	3.27778	5.42857
	5.4	3.04819	3.52778	3.37662
	3.375	8.86747	3.75	3.54545
	7.325	7.20482	3.22222	2.96104
	3.65	6.14458	3.66667	7.09091
	6.35	3.98795	2.80556	4.49351
	4.15	3.85542	3.16667	4.77922
	9.625	5.95181	2.61111	3.4026
	5.525	5.03614	2.83333	4.63636
	11.925	4.60241	3.16667
	4.225	7.74699	4.25	3.53247
	3.8	7.92771	3.19444	5.92208
	10.2	5.45783	2.52778	3.54545
	3.4	3.20482	2.44444	4.22078
	5.325	3.56627	2.61111	4.19481
	5.175	3.63855	3.75	5.16883
	3.1	3.21687	3.13889	2.77922
	4.35	7.25301	2.41667	2.63636
	8.275	3.15663	4.41667	4.4026
	7.125	5.81928	2.19444	3.64935
		5.86747	2.44444	2.45455
	9.1	5.3253	2.44444	2.58442
	4.9	5.86747	2.61111	2.54545
	8.225	4.83133	3.22222	3.50649
	6.9	6.14458	3.02778	2.5974
	7.575	7.46988	2.83333	2.46753
	9.25	4.93976	3.72222	3.83117
	4.175	3.09639		4.32468
	8.875	4.39759	3.51429	2.79221
	6.55	6.6747	3.42857	8.2987
	7.35	3.79518	2.65714	4.62338
	7.375	5.53012	2.71429	3.41558
	6.65	5.14458	2.68571	5.14286
	6.85	3.37349	5	4.54545
	5.525	4.0241	3.2	2.97403
	5.55	3.08434	3.31429	3.20779
	6.225	8.38554	2.74286	4.81818
	6.575	4.15663	3.48571	3.67532
	5.65	6.95181	2.74286	4.16883
	4.275	7.44578	2.8	3.66234
	4.775		3.17143	6.37662
	7.65	3.13793	3.68571	5.45455
	9.225	3.7069	2.88571	3.84416
	8.375	3.87931	2.42857	3.31169
	6.75	3.81034	4.68571	7.46753
	10.025	3.56897	3.25714	2.97403
	10.225	5.96552	3.05714	2.76623
	6.875	7.32759	3.11429	3.49351
	4.925	3.7069	4.85714	4.57143
	5.525	9.51724	4.2	3.18182
		7.17241	2.62857	2.96104
		8.39655	2.8	2.97403
		11.3276	3.08571	5.66234
		6.15517	3.77143	2.54545
		7.01724	3.82857	3.96104
		6.34483	2.94286	2.67532
		4.51724	2.88571	3.12987
		3.98276	5.8	3.75325
		3.55172	6.25714	4
		4.22414	3.74286	2.94805
		7.22414	3.2
		6.72414	2.51429	3.06742
		3.62069	6.8	7.25843
		6.27586	3.82857	2.64045
		11.1897	6.08571	3.73034
		5.39655	2.4	6.10112
		3.31034	3.08571	3.1573
		5.75862	2.91429	4.77528
		4.87931	3.74286	5.13483
		5.18966	5.11429	6.19101
		4.55172	3.71429	5.73034
		4.44828	4.65714	5.47191
		3.27586	3.74286	3.51685
			3.42857	5.49438
		6.64583	3.8	2.68539
		13.4792	2.54286	4.86517
		4.9375	4.11429	3.35955
		4.91667	5.88571	3.49438
		10.0625	3.74286	3.03371
		7.3125	2.77143	5.73034
		10.4792		3.75281
		7.83333	6.35135	3.39326
		4.04167	5.21622	5.40449
		5.91667	2.62162	2.78652
		6.77083	6.27027	3.67416
		8.27083	2.72973	2.57303
		6.39583	3.18919	5.42697
		5.41667	3.2973	3.40449
		5	2.86486	3.11236
		3.70833	4.62162
		7.66667	3.72973
		4.35417	3.56757
		4.22917	2.83784
		4.3125	2.72973
		10.0417	6.91892
		8.83333	2.48649
		3.375	3.78378
		3.47917	4.40541
		4.08333	5.35135
		4.29167	2.94595
		3.60417	4.43243
		5.5	3.48649
		3.875	4.10811
			5.16216
			2.97297
			3.72973
			3.59459
			3.08108
			2.97297
			2.45946
			3.35135
			3.83784
			3.67568
			2.67568
			3.75676
			3.81081
			2.83784
			3.08108
			3.48649
			4.10811
			2.78378
			2.59459
			3.24324
			2.47826
			2.91304
			2.76087
			4
			2.26087
			3.15217
			3.1087
			3.97826
			2.1087
			3.30435
			2.54348
			2.5
			6.6087
			2.71739
			3.19565
			3.19565
			3.73913
			4.63043
			2.91304
			2.47826
			3.34783
			3.3913
			3.02174
			3.1087
			2.19565
			2.17391
			3.52174
			3.15217
			3.76087
			3.34783
			3.47826
			2.56522
			3.45652
			3.04348
			2.41304
			4.56522
			2.82609
			2.28261
			2.65217
			3.28261
			3.1087
			2.63043
			3.26087
			3.08108
			2.78378
			3.02703
			2.78378
			3.56757
			4.78378
			2.72973
			4.59459
			3.83784
			2.24324
			2.7027
			2.67568
			3.81081
			2.32432
			2.72973
			2.27027
			3.13514
			4.10811
			3.91892
			3.64865
			4.27027
			2.51351
			3.10811
			2.59459
			3.56757
			3.45946
			2.81081
			2.43243
			2.7027
			2.7027
			3.62162
			2.86486
			2.08108
			2.13514
			2.35135
			2.62162
			2.54054
