# Supplementary material for: Tyramine induces dynamic RNP granule remodeling and translation activation in the Drosophila brain
Source: eLife. 2021 Apr 23;10:e65742. doi: 10.7554/eLife.65742 (PMC8064753; doi:10.7554/eLife.65742)
Supplement: Figure 5—figure supplement 1—source data 1. [file elife-65742-fig5-figsupp1-data1.xlsx]

## Sheet: A
	A
	# profilin RNA in Imp+ granules
	control	Tyramine (10 min)
Repl 1	1.33144	0
	0	0
	1.11841	0
	1.74751	1.10953
	1.55334	0.776671
	0.665718	1.38075
	1.16501	1.16501
	1.33144	0.607829
	0	0.665718
	0.621337	1.82349
	0.932005	0.735793
	1.22632	0.635458
	1.41827	1.55334
	0.559203
	0.776671
	1.55334
Repl 2	0.850743	0.505129
	1.42625	2.02052
	0.918416	0.898007
	0.404103	0.76972
	1.07761	0.425372
	1.17863	0.484924
	1.05418	0.538804
	0.841881	0.673505
	0.878485	0.713123
	1.76795	1.01026
	0.808206	0.808206
	0.950831	0.621697
	1.34701
	1.1021
	1.07761
	0.252564
	1.06343
Repl 3	2.19893	0.203605
	0.964444	0.594306
	0.897524	0.414893
	1.1219	0.183244
	0.305407	0.488652
	0.956058	0.224381
	0.467858	0.897524
	0.687167	0.439787
	1.14528	0.931751
	0.467858	0.81442
	0.977304	1.34629
	0.673143	0.935716
	1.83244	0.578667
	0.758253	0.360481
	1.40357
	1.40957
	1.29349
	0.439787

## Sheet: B
	B
	# profilin RNA
	control	Tyramine (10 min)
Repl 1	135.65	94.0798
	131.274	85.3282
	102.831	100.644
	30.6306	98.4556
	98.4556	87.5161
	131.274	87.5161
	133.462	61.2613
	105.019	96.2677
	105.019	129.086
	94.0798	129.086
	98.4556	83.1403
	98.4556	63.4492
	107.207
	105.019
	109.395
	65.6371
	48.1338
Repl 2	116.629	63.7813
	98.4055	67.426
	136.674	102.05
	111.162	105.695
	109.339	112.984
	94.7608	100.228
	83.8269	89.2938
	92.9385	87.4715
	107.517	91.1162
	102.05	107.517
	76.5376	102.05
	78.3599	92.9385
	114.806	45.5581
	103.872	58.3144
	91.1162	129.385
	82.0046	80.1822
Repl 3	82.2742	110.368
	122.408	78.2609
	112.375	108.361
	106.355	126.421
	76.2542	94.3144
	96.3211	104.348
	100.334	100.334
	102.341	102.341
	104.348	122.408
	98.3278	110.368
	96.3211	102.341
	102.341	96.3211
	90.301	114.381
	122.408	126.421
	94.3144
	84.2809
	106.355
	102.341
