# Supplementary material for: Tyramine induces dynamic RNP granule remodeling and translation activation in the Drosophila brain
Source: eLife. 2021 Apr 23;10:e65742. doi: 10.7554/eLife.65742 (PMC8064753; doi:10.7554/eLife.65742)
Supplement: Figure 5—source data 1. [file elife-65742-fig5-data1.xlsx]

## Sheet: A
	A
	normalized GFP intensity
	SV40 3'UTR		prof 3'UTR		cof 3'UTR		camk2 3'UTR
	ctrl	Tyramine	ctrl	Tyramine	ctrl	Tyramine	ctrl	Tyramine
Repl 1	88.9642	63.2233	106.388	56.3233	107.681	109.244	59.9739	116.925
	114.254	97.996	108.735	49.2829	116.263	127.541	64.7261	122.975
	138.64	116.06	71.9687	197.132	120.737	143.343	105.625	104.55
	116.06	126.447	106.388	183.833	110.07	126.594	115.606	99.7306
	83.545	61.8685	118.123	131.421	93.0268	131.118	42.0604	114.359
	81.287	56.4493	107.953	125.163	160.273	115.47	41.5832	96.0729
	133.22	58.7073	46.9361	133.768	74.6212	121.864	55.6513	70.2539
	139.994	53.2882	36.7666	127.51	116.335	106.618	65.957	73.107
	112.447	79.0291	133.768	122.816	77.7987	146.954	147.447	73.981
	109.737	85.3514	150.196	119.687	107.048	167.214	137.761	100.532
	66.3844	85.3514	104.824	117.34	122.452	112.899	112.234	93.7018
	49.6754	69.5456	107.953	94.6545	78.59	110.056	110.955	99.6121
	149.478	115.608		186.962	46.8983	154.402	155.478	71.0037
	110.189	110.641		161.147	68.2058	152.035	151.418	80.4138
	50.5786	110.641		158.8			117.467	88.141
	55.5461	32.0632		129.074			116.057	87.435
Repl 2	164.734	99.6367	48.1261	158.303	86.8975	89.7256	58.9142	56.4081
	160.651	97.9961	33.2953	124.666	152.676	79.7516	52.4103	67.6863
	86.3801	83.1667	68.2908	169.885	96.5199	209.036	111.978	97.3125
	135.374	117.412	41.8	176.249	105.052	205.898	118.946	100.09
	107.603	97.5057	186.439	162.842	121.427	107.94	92.215	99.3624
	128.208	109.518	155.69	143.786	97.1582	99.6619	93.977	106.381
	107.017	53.9424	28.0792	173.742	106.49	130.353	76.9303	108.16
	82.9248	58.1234	40.0094	192.591	104.851	126.217	78.7347	87.2411
	75.1612	110.202	55.5917	264.331	72.9088	157.733	56.597	174.617
	76.033	161.611	63.269	455.139	100.195	111.333	64.9584	179.853
	108.201	84.2494	153.012	678.361	94.2002	174.44	108.716	82.5899
	86.7034	98.783	195.423	161.843	97.6734	128.349	98.4536	88.3632
	88.4309	82.2694	123.077	113.222	67.7791	130.028	134.159	84.6474
	81.7163	88.2305	134.892	111.906	72.2108	82.0883	89.405	90.8687
	91.0488	124.744	102.587		90.5633	100.553	241.266	118.535
	129.528	129.103	81.2064		133.398	112.237	144.568	116.371
	92.5979	113.101	185.474			157.7	60.1295	102.639
	101.463	120.498	143.686			150.161	96.7279	85.1067
	49.256	116.513	52.5845			104.094	109.183	118.276
	46.9678	80.1524	79.9339			138.366	111.732	102.091
			92.0936					51.1383
			102.552					50.5167
			115.497
			117.392
Repl 3	109.993	119.613	85.3895	126.711	90.6137	144.584	103.232	56.004
	96.6485	81.6459	102.785	145.642	117.797	160.329	98.8478	59.3526
	99.5788	105.391	76.1961	139.815	69.9071	139.75	87.2193	111.022
	101.009	99.041	67.6681	138.047	82.1891	132.682	71.9831	98.8484
	116.758	80.7228	116.447	138.483	139.391	100.159	115.082	94.5032
	91.5785	70.9463	120.965	126.649	136.065	90.9128	108.868	80.8625
	115.39	93.6048	90.8411	124.286	135.417	147.708	32.949	143.032
	106.789	138.505	87.6651	126.075	99.5904	142.258	104.411	124.74
	106.193	124.037	49.2668	135.93	67.7408	95.1398	80.7284	148.801
	110.102	95.7363	55.596		68.2953	92.1344	104.026	118.668
	86.9398		102.957		71.1118	94.8403	124.73	146.985
	98.9206		105.112		50.7476	88.4264	104.542	121.321
	78.8218		119.684		114.106	110.808	66.9384	59.7329
			109.781		126.342	112.984	99.8153	83.8069
			104.325		108.974		74.678	202.52
			119.965		87.4293		127.4	71.0818
			136.025		83.7143		147.178	136.102
			153.499		87.8084		147.372	102.511
			94.1778		128.769			59.3746
			101.655		133.991			89.9609

## Sheet: B
	B
	normalized GFP intensity (profilin reporter)
	ctrl	Tyramine	Tyramine + aniso
	63.471	139.268	96.3408
	63.3229	151.192	117.089
	90.6358	145.423	148.124
	111.779	126.801	118.427
	90.6794	172.651	123.554
	84.7946	201.102	133.668
	107.995	217.87	68.2428
	139.902	200.498	73.8821
	199.311	215.416	97.0345
	106.865	174.255	109.438
	112.293	213.56	146.494
	93.904	292.946	166.55
	134.189	322.847
	48.2797	153.383
	77.2761	214.54
	75.3028	181.918
		127.248
		210.693
		130.806
		184.954
		195.004
		190.259
	105.552	122.652	110.642
	108.243	117.949	87.7923
	70.3269	153.331	137.101
	80.011	155.511	126.557
	98.3221	144.299	103.787
	112.519	145.222	121.263
	71.325	114.905	97.8309
	64.6935	122.085	97.1436
	100.855	126.146	128.854
	117.171	126.263	166.584
	141.425	310.019	51.0139
	128.245	309.408	76.1847
	105.309	141.244	87.2696
	103.707	137.801	84.1163
	103.231	130.414	36.311
	89.0651	157.828	42.6275
			54.0536
			93.4816
	24.6776	169.656	190.818
	28.3868	180.162	233.29
	105.748	225.88	86.4651
	110.451	227.241	91.2879
	103.124	199.637	208.225
	92.4982	192.921	162.33
	109.437	224.246	205.849
	120.125	227.02	168.583
	101.061	200.312	108.748
	108.002	199.412	106.282
	107.459	194.636	194.507
	110.109	162.104	184.144
	140.359	317.102	162.211
	111.701	314.884	201.136
	108.164	244.302	178.518
	121.335	345.096	152.283
	91.4735
	87.9073
	112.842
	105.14

## Sheet: C
	C
	normalized GFP intensity (profilin reporter)
	ctrl		ala
Tyramine	no	yes	yes
Repl 1	103.711	217.923	154.784
	131.247	207.303	137.297
	122.442	118.361	163.179
	124.05	111.95	114.768
	75.7316	160.184	72.8078
	104.508	160.842	60.1357
	127.629	209.504	124.799
	110.327	210.656	158.559
	114.434	143.099	95.6952
	99.6026	190.952	87.3465
	85.07	190.537	61.9396
	95.872	159.948	48.9739
	53.2183	174.619
	52.1583	179.926
		124.014
		125.783
Repl 2	56.1597	208.242	78.7138
	65.3785	205.367	71.2116
	85.7215	149.201	60.5922
	86.441	152.356	62.3002
	114.295	275.216	57.3772
	98.6991	260.412	58.1293
	202.235	171.756	58.5528
	172.767	159.429	52.1078
	68.7201	135.507	115.362
	91.9765	118.497	119.214
	42.9297	132.15	109.317
	73.9716	122.063	110.909
	123.184
	107.262
	113.248
	95.1183
	94.8979
	106.994
Repl 3	93.6049	185.338	94.6024
	60.2767	180.69	89.4687
	105.825	312.962	190.136
	103.742	249.745	169.508
	214.494	131.627	77.0652
	163.98	117.718	102.738
	45.1159	136.435	90.2664
	54.8581	136.506	71.8847
	92.9082	87.916	59.2172
	74.2085	95.501	56.5948
	77.6963	283.852	74.3152
	155.069	213.31	70.4545
	69.747	107.244
	88.4727	99.2146
		230.368
		163.317
		108.858
		97.5536

## Sheet: D
	D
	# of gfp-profilin 3'UTR RNA in Me31B+ granules
	ctrl	Tyramine (10')
Repl 1	0.713445	0.721129
	0.739619	0.717541
	1.00157	0.539306
	1.39349	1.04511
	1.03192	0.343395
	1.22225	0.548804
	1.22225	0.232248
	0.932967	0.667712
	0.715405	0.801254
	0.837131	0.593521
	1.31549	0.603684
	0.77314	0.983996
	1.09976	0.452321
	1.00157	0.579855
Repl 2	0.740432	0.832986
	0.596766	0.822703
	0.857343	0.701462
	0.946782	0.378093
	1.4331	0
	0.666389	0.143309
	0.617027	0.617027
	0.818373	0.740432
	1.68098	0.67312
	1.01545	0.296173
	1.2007	0.818373
	0.600351	0.433424
	1.54525
	0.866848
	1.22554
	1.01545
	1.16354
	1.00968
Repl 3	0.96781	0.119115
	0.657903	0.514361
	1.13159	0.479489
	1.07043	0.245999
	1.41449	0.649275
	1.41449	0.551101
	1.69739	0.251465
	1.84499	0.251465
	1.12184	0.398448
	1.11139	0.404141
	1.09695	0.424348
	0.735536	0.317863
	0.342907	0.322289
	0.471497	0.3674
	0.409998
	0.510789
