# Supplementary material for: Tyramine induces dynamic RNP granule remodeling and translation activation in the Drosophila brain
Source: eLife. 2021 Apr 23;10:e65742. doi: 10.7554/eLife.65742 (PMC8064753; doi:10.7554/eLife.65742)
Supplement: Figure 6—source data 1. [file elife-65742-fig6-data1.xlsx]

## Sheet: B
	B
	number of ScFv-GFP foci/cell
Puro	no	no	yes
SunTag-prof	yes	no	yes
Tyr	yes	yes	yes
	2	0	8
	2	0	1
	2	0	1
	2	0	1
	1	0	0
	1	0	0
	1	0	0
	1	0	0
	3	0	0
	3	0	0
	3	0	0
	3	0	0
	3	0	0
	5	0	0
	5	0	0
	6	0	0
	7	0	0
	8	0	0
	1	0	0
	2	0	0
	3	0	1
	3	0	1
	3	0	2
	4	0	3
	4	0	3
	5	0	2
	5	0	2
	5	0	2
	6	0	1
	8	0	1
	0	0	0
	1	0	0
	1	0	0
	1	0	0
	2	0	0
	2	0	0
	3	0	0
	4	0	0
	4	0	0
	5	0	0
	0	0	0
	0	0	0
	2	0	0
	2	0	2
	0	0	3
	0	0	0
	1	0	0
		0	0
	0	0	1
	4	0	1
	2	0	0
	3	0	0
	4	0	0
	4	0	0
	0	0	0
		0	0
		0	0
		0	0
		0	0
		0	0
			1

## Sheet: C
	C
	number of cells with ScFv-GFP foci (fraction) - number of cells with ScFv-GFP foci
	time (min)
	0	0	0	0	0	0
	0.5	0	0	0	0	0
	1	0	0	0	0	0
	1.5	0	0	0	0	0
	2	0	0	0	0	0
	2.5	0.733333	0.727273	0	0	0.4
	3	1	0.909091	0.230769	1	0.8
	3.5	1	1	0.461538	1	1
	4	1	1	0.769231	1	1
	4.5	1	1	1	1	1
	5	1	1	0.923077	1	1
	5.5	1	1	1	1	1
	6	1	1	1	1	1
	6.5	1	1	1	1	1
	7	1	1	0.769231	1	1
	7.5	1	1	0.769231	0.666667	1
	8	1	1	0.769231	0.666667	1
	8.5	1	0.909091	0.769231	0.666667	1
	9	0.933333	0.818182	0.769231	0.666667	0.8
	9.5	0.866667	0.636364	0.769231	0.666667	1
	10	0.733333	0.636364	0.692308	0.666667	0.8
	10.5	0.733333	0.636364	0.692308	0.666667	0.8
	11	0.733333	0.636364	0.692308	0.666667	0.8
	11.5	0.733333	0.545455	0.692308	0.666667	0.8
	12	0.666667	0.545455	0.692308	0.666667	0.8
	time (min)	ΔF/F(0) - GCamp3.0 fluorescence (extracted from Figure 3F - control + Tyramine)
	0	0.0432655	0.036559	0.0164326	0.00550537	0.000249404	0.0186724	0.0129722		0.0218458	0.0915452	0.0045531	0.0352502	0.0209127	0.0509575		-0.0145755	0.0422511	-0.0144893	0.0308404	0.00904693
	0.5	0.00349701	0.0202077	0.00450963	-0.00916705	0.00501579	-0.0115923	-0.00377698		-0.00481136	0.00353281	-0.0161065	0.00244169	-0.00474228	-0.0013535		-0.00820938	0.0108332	-0.0011424	-0.00313614	-0.00570408
	1	-0.0502536	-0.0581341	-0.00819764	-0.00335975	-0.00697264	-0.0134752	0.00829562		-0.0191676	-0.0259317	0.00714143	-0.0188039	0.0025655	-0.0236487		0.00795092	-0.0113139	0.00257944	-0.0145366	0.00504966
	1.5	0.00349113	0.00136735	-0.0127446	0.00702143	0.00170746	0.00639507	-0.0174908		0.00213319	-0.0691463	0.00441192	-0.018888	-0.0187359	-0.0259553		0.014834	-0.0417704	0.0130523	-0.0131677	-0.00839251
	2	0.0105101	0.00893345	-0.00489244	0.0208202	-0.006606	-0.021979	0.0454405		0.0327453	-0.044832	0.00676494	0.404395	-0.0171811	-0.0378338		0.266856	0.0999708	0.0274123	-0.0364794	-0.0146537
	2.5	0.430148	0.476432	-0.0162832	0.00995592	-0.00895082	0.0069921	0.107472		0.0436448	-0.0843819	-0.0174241	0.505711	-0.0401928	-0.0432772		0.863712	0.372466	0.0336361	-0.049596	0.0013
	3	0.431309	0.876519	-0.0329399	-0.00777433	-0.00742456	-0.0158021	0.0778126		0.143858	-0.0371995	-0.0101298	0.492128	-0.017803	-0.0478538		0.990138	0.486772	0.0397358	-0.0728259	0.0137163
	3.5	0.422974	1.01819	-0.143141	0.0367312	0.00701101	-0.0317993	-0.000782865		0.169861	-0.0511842	0.0193771	0.411888	0.0699681	-0.0590124		0.874268	0.558055	0.0298315	-0.104106	0.237175
	4	0.327382	0.801745	-0.0981289	0.0801266	0.02733	-0.00487189	-0.065122		0.219345	-0.0446072	0.0715202	0.353625	0.145378	-0.06771		0.714556	0.579103	0.0601542	-0.130114	0.405945
	4.5	0.2133	0.559462	-0.0816309	0.091032	0.0324971	-0.0124419	-0.121557		0.301341	-0.0385775	0.150394	0.286857	0.219855	-0.0728816		0.577152	0.599087	0.12081	-0.149033	0.566543
	5	0.174499	0.396314	-0.0168808	0.0775673	0.0822243	-0.00911231	-0.0563182		0.382869	-0.0286778	0.20569	0.240633	0.299075	-0.0730433		0.45712	0.574158	0.165896	-0.154917	0.708181
	5.5	0.0766851	0.284461	-0.0119603	0.102904	0.0624682	0.00851528	0.00133911		0.461283	-0.0291371	0.223714	0.199265	0.293711	-0.067115		0.378549	0.583498	0.215623	-0.153834	0.829797
	6	0.0202627	0.192332	0.00581678	0.118845	0.125983	0.0119367	0.0719274		0.527864	-0.0160222	0.223667	0.162751	0.33919	-0.0492275		0.286022	0.563617	0.250681	-0.167155	0.915509
	6.5	-0.0251198	0.105867	0.0493072	0.0975382	0.137937	0.0139344	0.147707		0.564735	0.00465666	0.222443	0.142825	0.25896	-0.0274392		0.238997	0.510739	0.285242	-0.171344	0.979961
	7	-0.0673926	0.0505889	0.0406801	0.136026	0.110669	0.00101418	0.22392		0.601856	0.00308327	0.214208	0.119166	0.332426	0.013052		0.156577	0.481553	0.286969	-0.176737	1.07098
	7.5	-0.178821	-0.0026104	0.0256106	0.122443	0.141101	-0.00588224	0.277526		0.62761	0.00766664	0.179806	0.0970503	0.292622	0.0629682		0.100805	0.471561	0.299261	-0.176329	1.11498
	8	-0.21632	-0.0795354	0.0566646	0.140615	0.160686	-0.0206854	0.327725		0.656603	0.00735391	0.181312	0.0645505	0.314235	0.102306		0.0547314	0.435713	0.309858	-0.174183	1.10632
	8.5	-0.202191	-0.0699415	0.0531539	0.12475	0.126375	-0.0238007	0.400813		0.673139	0.0222083	0.157641	0.0480761	0.282749	0.143312		0.00920239	0.397462	0.302218	-0.184971	1.11322
	9	-0.232386	-0.101641	0.0283556	0.0965463	0.149209	-0.0323657	0.428715		0.694876	0.0174295	0.121451	0.0427437	0.240379	0.184119		-0.0303822	0.360104	0.303128	-0.179475	1.14396
	9.5	-0.270776	-0.139609	0.0643767	0.128903	0.12392	-0.0367056	0.454741		0.708609	-0.000708516	0.102204	0.0340153	0.21729	0.208302		-0.0617098	0.346954	0.305371	-0.194349	1.1112
	10	-0.318495	-0.180162	0.0637138	0.141997	0.139651	-0.0420559	0.513944		0.729661	0.0107353	0.0938268	0.0037327	0.19078	0.210513		-0.080305	0.313063	0.300853	-0.201561	1.10239
	10.5	-0.352811	-0.202738	0.0464502	0.140543	0.148118	-0.0566831	0.545574		0.762235	0.0120252	0.0819205	-0.0189442	0.18596	0.206994		-0.0986418	0.286658	0.287176	-0.204707	1.05506
	11	-0.378806	-0.230444	0.0683541	0.106732	0.0762813	-0.0570352	0.570777		0.797923	0.0175272	0.0481311	-0.0194213	0.143512	0.180336		-0.128364	0.274881	0.281645	-0.203604	1.03401
	11.5	-0.40377	-0.265106	0.0446389	0.119375	0.0587506	-0.0764462	0.586524		0.805148	0.015475	0.03406	-0.0479358	0.0930576	0.101674		-0.136526	0.251223	0.282854	-0.203379	0.991068
	12	-0.414404	-0.239756	0.0405961	0.089963	0.0700227	-0.0838631	0.59837		0.848715	0.0165011	0.0190948	-0.0543347	0.0687243	-0.00664263		-0.154047	0.202912	0.26685	-0.197659	0.974973
