# Supplementary material for: Tyramine induces dynamic RNP granule remodeling and translation activation in the Drosophila brain
Source: eLife. 2021 Apr 23;10:e65742. doi: 10.7554/eLife.65742 (PMC8064753; doi:10.7554/eLife.65742)
Supplement: Supplementary file 1. — Number of peptides found for each protein in the GFP-Imp- or GFP- bound fractions are indicated for replicates 1 and 2. [file elife-65742-supp1.xlsx]

## Sheet: main_table
			Replicate 1			Replicate 2
Protein names	FlyBase References	Molecular Function GO terms	GFP-Imp	GFP	GFP-Imp:GFP ratio	GFP-Imp2	GFP2	GFP-Imp:GFP ratio2
Smooth (Sm)	FBgn0003435	RNA binding protein	34		-	42		-
Bicoid stability factor (Bsf)	FBgn0032679	RNA binding protein	30		-	47		-
Beta-Tubulin at 97EF (β-tub97EF)	FBgn0003890	structural molecule	26		-	15		-
Zinc-finger protein at 72D (Zn72D)	FBgn0263603	RNA binding protein	25		-	24		-
UDP-glucose pyrophosphorylase (UGP)	FBgn0035978	enzyme	22		-	11		-
CG1316	FBgn0035526	RNA binding protein	17		-	31		-
Hephaestus (Heph)	FBgn0011224	RNA binding protein	16		-	21		-
Argonaute-1 (AGO1)	FBgn0262739	RNA binding protein	11		-	14		-
Chaperonin containing TCP1 subunit 3 (CCT3)	FBgn0015019	small molecule binding	10		-	10		-
Pasilla (Ps)	FBgn0261552	RNA binding protein	50		-	45	2	22.5
Quaking related 54B (Qkr54B)	FBgn0022987	RNA binding protein	17		-	34	3	11.3333
Quaking related 58E-2 (Qkr58E-2)	FBgn0022985	RNA binding protein	37		-	33	3	11
Midway (Mdy)	FBgn0004797	enzyme	13		-	19	2	9.5
Heterogeneous nuclear ribonucleoprotein 27C (Hrb27C)	FBgn0004838	RNA binding protein	15		-	44	6	7.33333
Acetyl-CoA carboxylase (ACC)	FBgn0033246	enzyme	16		-	10	4	2.5
Syncrip (Syp)	FBgn0038826	RNA binding protein	208	3	69.3333	172		-
RNA-binding protein 9 (Rbp9)	FBgn0010263	RNA binding protein	52	4	13	35	2	17.5
Polyadenylate-binding protein (PAbp)	FBgn0265297	RNA binding protein	58	5	11.6	94	3	31.3333
Squid (Sqd)	FBgn0263396	RNA binding protein	22	2	11	12		-
Elav	FBgn0260400	RNA binding protein	32	3	10.6667	21	3	7
Dodeca-satellite-binding protein 1 (Dp1)	FBgn0027835	RNA binding protein	18	2	9	17	3	5.66667
Lost	FBgn0263594	RNA binding protein	16	2	8	12		-
ATP citrate lyase (ATPCL)	FBgn0020236	enzyme	16	2	8	12	5	2.4
CG7461	FBgn0034432	enzyme	21	3	7	10		-
Purine-rich binding protein-alpha (Pur-alpha)	FBgn0022361	RNA binding protein	19	3	6.33333	20	2	10
Found in neurons (Fne)	FBgn0086675	RNA binding protein	25	4	6.25	20	3	6.66667
Chaperonin containing TCP1 subunit 7 (CCT7)	FBgn0037632	small molecule binding	12	2	6	11		-
Shibire (Shi)	FBgn0003392	cytoskeletal binding	41	7	5.85714	48	14	3.42857
Comatose (Comt)	FBgn0000346	enzyme	56	10	5.6	62	5	12.4
Modulo (Mod)	FBgn0002780	DNA binding protein	11	2	5.5	13		-
Fasciclin-1 (Fas1)	FBgn0262742	other molecular function	11	2	5.5	11	3	3.66667
Regulatory particle non-ATPase 13 (Rpn13)	FBgn0033886	other molecular function	16	3	5.33333	18		-
Amphiphysin (Amph)	FBgn0027356	lipid binding	15	3	5	16	5	3.2
Mitofilin	FBgn0019960	other molecular function	24	5	4.8	12		-
Fatty acid synthase 1 (FASN1)	FBgn0283427	enzyme	36	8	4.5	33	7	4.71429
Neural conserved at 73EF (Nc73EF)	FBgn0010352	enzyme	13	3	4.33333	10	5	2
Heat shock 70 kDa protein cognate 4 (Hsc70-4)	FBgn0266599	other molecular function	99	24	4.125	59	8	7.375
Mitochondrial trifunctional protein α subunit (Mtpa)	FBgn0028479	enzyme	35	9	3.88889	45	6	7.5
Calcium/calmodulin-dependent protein kinase type II alpha chain (CaMKII)	FBgn0264607	enzyme	31	8	3.875	25	3	8.33333
Methylcrotonoyl-CoA carboxylase 2 (Mccc2)	FBgn0042083	enzyme	11	3	3.66667	10		-
α-Tubulin at 84B (α-Tub84B)	FBgn0003884	structural molecule	50	15	3.33333	50	15	3.33333
Pyruvate kinase (Pyk)	FBgn0267385	enzyme	38	12	3.16667	38	12	3.16667
Zinc finger protein on ecdysone puffs (Pep)	FBgn0004401	RNA binding protein	25	8	3.125	25	8	3.125
Ypsilon schachtel (Yps)	FBgn0022959	RNA binding protein	23	8	2.875	23	8	2.875
Δ1-pyrroline-5-carboxylate synthase (P5CS)	FBgn0037146	enzyme	26	10	2.6	26	10	2.6
Mustard (Mtd)	FBgn0013576	uncharacterized	18	7	2.57143	18	7	2.57143
Pyruvate carboxylase (Pcb)	FBgn0027580	small molecule binding	15	6	2.5	13	5	2.6
CG5080	FBgn0031313	uncharacterized	20	9	2.22222	20	9	2.22222
Apolipophorin (Apolpp)	FBgn0087002	small molecule binding	64	30	2.13333	38	12	3.16667
Adaptor Protein complex 1/2, β subunit (AP-1-2β)	FBgn0004862	other molecular function	19	9	2.11111	24	9	2.66667
Nucleoporin 50kD (Nup50)	FBgn0033264	DNA binding protein	14	7	2	13		-
Table S1- List of Imp protein partners identified by IP-MS
Numbers in D,E,G,H correspond to the numbers of peptides identified in the bound fractions.
